# Supplementary material for: Image-based phenotyping for identification of QTL determining fruit shape and size in American cranberry (Vaccinium macrocarpon L.)
Source: PeerJ. 2018 Aug 15;6:e5461. doi: 10.7717/peerj.5461 (PMC6098679; doi:10.7717/peerj.5461)
Supplement: Supplemental Information 2 [file peerj-06-5461-s002.xlsx]

## Sheet: Consensus QTL 
Dataset1. Collocated QTL (based on univarate and covarate models) across all three years for fruit length (len), width (wid), area, eccentricity (ecc), and persistent homology PC1 and 2 (pc1 and pc2)
		Trait	qtlID	Location	Variance	Identified using:
		len	qtl1	2@54.9	6.96	C/NC
		len	qtl3	4@66.9	6.107	C/NC
		len	qtl5	11@24.3	3.247	C/NC
		len	qtl6	11@81.3	9.689	C/NC
		len	qtl7	12@48.7	5.048	C/NC
		wid	qtl8	1@103.6	10.784	C/NC
		wid	qtl11	7@57.3	11.757	C/NC
		wid	qtl12	8@52.9	3.08	C/NC
		wid	qtl13	9@88.2	5.156	C/NC
		wid	qtl15	11@56.1	4.233	C/NC
		wid	qtl16	12@52.5	3.434	C/NC
		area	qtl17	1@103.2	9.74	C/NC
		area	qtl18	2@55.6	4.915	C/NC
		area	qtl21	7@57.5	11.222	C/NC
		area	qtl23	11@82.7	7.794	C/NC
		area	qtl24	12@51.6	2.694	C/NC
		ecc	qtl26	1@106.3	7.841	C/NC
		ecc	qtl27	2@22.4	10.31	C/NC
		ecc	qtl28	2@57.7	9.331	C/NC
		ecc	qtl30	5@42.9	5.294	C/NC
		ecc	qtl31	6@46.2	6.464	C/NC
		ecc	qtl32	7@49.6	5.363	C/NC
		ecc	qtl35	12@39.9	6.947	C/NC
		LW	qtl37	1@106.4	7.817	C/NC
		LW	qtl38	2@8.2	3.892	C/NC
		LW	qtl39	2@57.9	9.23	C/NC
		LW	qtl40	5@44.2	4.824	C/NC
		LW	qtl41	6@46	6.264	C/NC
		LW	qtl45	12@50.5	7.361	C/NC
		pc1	qtl48	9@83.9	5.385	C/NC
		pc1	qtl49	11@21.7	8.211	C/NC
		pc1	qtl50	11@77.6	7.228	C/NC
		pc1	qtl51	12@52.2	4.835	C/NC
		pc2	qtl54	5@52.1	4.93	C/NC
		pc2	qtl55	6@42.9	4.508	C/NC
		pc2	qtl59	12@54.8	11.571	C/NC
		len	qtl61	5@42.6	4.243	C/NC
		len	qtl62	6@21.3	5.346	C/NC
		len	qtl63	7@56.3	10.352	C/NC
		wid	qtl64	1@11.5	1.911	C/NC
		wid	qtl67	11@81.3	5.663	C/NC
		area	qtl71	7@50.7	1.685	C
		ecc	qtl73	9@88.9	4.064	C/NC
		ecc	qtl75	12@51	7.855	C/NC
		LW	qtl76	2@22.3	10.853	C/NC
		LW	qtl79	9@88.3	4.74	C/NC
		LW	qtl80	10@11.2	3.333	C/NC
		len	qtl90	1@103.3	6.774	C/NC
		wid	qtl91	2@52.7	5.135	C/NC
		area	qtl92	5@42.5	1.216	C/NC
		LW	qtl99	12@38.5	7.178	C
		LW	qtl112	7@49.8	5.986	C
		LW	qtl120	4@33.8	0.341	C

## Sheet: 17 QTL (Only univariate)
Dataset2. Collocated QTL (based on univariate analysis only) across all three years for fruit length (len), width (wid), area, eccentricity (ecc), and persistent homology PC1 and 2 (pc1 and pc2)
	Trait	QTL ID	Location	Explained variance (in %, average across all three years)
	len	qtl2	4@69.4	4.301
	wid	qtl6	1@103.2	13.618
	wid	qtl8	7@57.1	10.498
	wid	qtl10	9@84.4	6.122
	area	qtl13	1@103.3	9.687
	area	qtl16	7@57.9	4.415
	area	qtl18	11@82.3	8.167
	ecc	qtl21	2@21.8	12.553
	ecc	qtl23	5@42.5	3.958
	ecc	qtl24	6@45.6	6.701
	LW	qtl28	1@106.8	6.01
	LW	qtl29	5@44.3	3.219
	LW	qtl30	6@45.6	6.382
	LW	qtl33	12@47.4	9.021
	pc1	qtl39	11@17.9	9.436
	pc1	qtl40	11@80.6	9.372
	pc1	qtl41	12@52.7	3.937
	pc1	qtl39	11@17.9	9.436
	pc1	qtl40	11@80.6	9.372
	pc1	qtl41	12@52.7	3.937

## Sheet: Gene annotation
Dataset3. Gene models located at each marker position.
Marker	Position (cM)	LG	Gene ID (based on Polashock et al. 2014)	Gene Description (based on Polashock et al. 2014)
scaffold_53968_1097	0	1
scaffold_2652_11004	0	1	g4810.t1	XP_002872928 hypothetical protein ARALYDRAFT_912161 [Arabidopsis lyrata subsp. lyrata].
scaffold_11414_3187	0	1	g14278.t1	XP_002328755 predicted protein [Populus trichocarpa].
scaffold_11414_3221	0	1	g14278.t1	XP_002328755 predicted protein [Populus trichocarpa].
scaffold_14462_3128	0	1
scaffold_39065_3280	0	1
scaffold_8248_6311	0	1	g11307.t1	XP_003534318 PREDICTED: ATP-dependent Clp protease proteolytic subunit 4, chloroplastic-like [Glycine max].
scaffold_93931_607	0	1
scaffold_1312_1044	0.45	1	g2746.t1	XP_002528720 conserved hypothetical protein [Ricinus communis].
SCF138607	0.45	1
scaffold_19157_2172	0.45	1
scaffold_23874_167	1.47	1	g22986.t1	XP_002280969 PREDICTED: beta-amyrin 28-oxidase [Vitis vinifera].
scaffold_7138_290	1.47	1
scaffold_18618_147	1.47	1	g19702.t1	XP_002278508 PREDICTED: uncharacterized protein LOC100250890 [Vitis vinifera].
scaffold_33444_1678	1.47	1
scaffold_33444_1679	1.47	1
scaffold_48833_933	1.47	1
scaffold_48833_935	1.47	1
scaffold_48833_937	1.47	1
scaffold_48833_951	1.47	1
scaffold_54537_1893	1.47	1
scaffold_54537_1898	1.47	1
scaffold_54537_1937	1.47	1
scaffold_54537_2005	1.47	1
scaffold_54537_2035	1.47	1
scaffold_54537_2052	1.47	1
scaffold_7514_3882	1.47	1	g10585.t1	XP_002516472 Vacuolar-processing enzyme precursor, putative [Ricinus communis].
scaffold_91922_297	1.47	1
scaffold_53968_1134	2.11	1
scaffold_109849_178	2.11	1
scaffold_7138_265	2.11	1
scaffold_7138_268	2.11	1
scaffold_7138_293	2.11	1
scaffold_35314_2820	2.11	1
scaffold_14462_3037	2.11	1
scaffold_17891_4953	2.11	1
scaffold_124213_198	2.9	1
scaffold_27699_4259	2.9	1
scaffold_65323_1244	2.9	1
scaffold_76130_520	2.9	1
scaffold_16810_3436	2.9	1
scaffold_16810_3459	2.9	1
scaffold_16810_3463	2.9	1
scaffold_16810_3565	2.9	1
scaffold_16810_3591	2.9	1
scaffold_16810_3636	2.9	1
scaffold_65323_1295	2.9	1
scaffold_8624_6846	2.9	1	g11662.t1	No BLAST Hit
SCF4386	2.9	1
scaffold_9628_2399	6.31	1	g12623.t1	XP_002265359 PREDICTED: cyclin-dependent kinase F-4-like [Vitis vinifera].
scaffold_53968_1035	6.31	1
scaffold_9628_2504	6.31	1	g12623.t1	XP_002265359 PREDICTED: cyclin-dependent kinase F-4-like [Vitis vinifera].
scaffold_76161_1307	7.51	1
scaffold_11402_4025	7.51	1
scaffold_3169_10335	7.51	1	g5534.t1	XP_004295401 PREDICTED: G-type lectin S-receptor-like serine/threonine-protein kinase RKS1-like [Fragaria vesca subsp. vesca].
scaffold_103838_294	7.51	1
scaffold_19502_3457	7.51	1
scaffold_11266_2720	7.51	1
scaffold_32919_297	7.51	1	g27347.t1	XP_002278594 PREDICTED: aluminum-activated malate transporter 12 [Vitis vinifera].
scaffold_34590_3437	7.51	1	g28013.t1	XP_002278326 PREDICTED: transcriptional regulator SUPERMAN [Vitis vinifera].
scaffold_11648_1119	7.51	1	g14472.t1	XP_002277376 PREDICTED: uncharacterized protein LOC100262589 [Vitis vinifera].
scaffold_119801_313	7.51	1
scaffold_2968_8231	7.51	1	g5233.t1	No BLAST Hit
scaffold_59245_719	8.9	1
scaffold_81081_492	8.9	1
scaffold_9160_2298	9.43	1	g12179.t1	XP_004243772 PREDICTED: putative ribonuclease H protein At1g65750-like [Solanum lycopersicum].
scaffold_9160_2381	9.43	1	g12179.t1	XP_004243772 PREDICTED: putative ribonuclease H protein At1g65750-like [Solanum lycopersicum].
scaffold_1100_4209	9.43	1	g2377.t1	XP_002276078 PREDICTED: abhydrolase domain-containing protein FAM108C1-like [Vitis vinifera].
scaffold_1100_4227	9.43	1	g2377.t1	XP_002276078 PREDICTED: abhydrolase domain-containing protein FAM108C1-like [Vitis vinifera].
scaffold_1106_7349	9.43	1	g2386.t1	NP_001063022 Os09g0371700 [Oryza sativa Japonica Group].
scaffold_3673_1458	9.43	1	g6229.t1	XP_002276932 PREDICTED: uncharacterized protein LOC100266131 [Vitis vinifera].
scaffold_3766_574	9.43	1	g6348.t1	XP_002269121 PREDICTED: pentatricopeptide repeat-containing protein At4g19220, mitochondrial [Vitis vinifera].
scaffold_3766_604	9.43	1	g6348.t1	XP_002269121 PREDICTED: pentatricopeptide repeat-containing protein At4g19220, mitochondrial [Vitis vinifera].
scaffold_4368_8707	9.43	1	g7109.t1	XP_002278429 PREDICTED: protein phosphatase 2C 29-like [Vitis vinifera].
scaffold_76507_369	9.43	1
scaffold_76507_384	9.43	1
vm51985	9.43	1
scaffold_26476_4152	9.43	1
scaffold_134917_143	9.72	1
scaffold_15733_1219	9.72	1	g17674.t1	XP_002279304 PREDICTED: regulator of nonsense transcripts 1 homolog isoform X2 [Vitis vinifera].
scaffold_35889_2207	9.72	1
scaffold_32919_317	10.57	1	g27347.t1	XP_002278594 PREDICTED: aluminum-activated malate transporter 12 [Vitis vinifera].
scaffold_134917_129	10.57	1
scaffold_9050_2056	11.12	1	g12075.t1	XP_004300204 PREDICTED: inactive poly [ADP-ribose] polymerase RCD1-like [Fragaria vesca subsp. vesca].
scaffold_9050_2066	11.12	1	g12075.t1	XP_004300204 PREDICTED: inactive poly [ADP-ribose] polymerase RCD1-like [Fragaria vesca subsp. vesca].
scaffold_96465_597	11.23	1
scaffold_96465_621	11.23	1
scaffold_71113_927	12.56	1
scaffold_71113_855	12.56	1
vm55441	12.85	1
scaffold_324_4853	14.11	1	g903.t1	No BLAST Hit
scaffold_40197_1814	14.11	1
scaffold_65439_1077	14.11	1
scaffold_40197_1830	14.11	1
scaffold_40197_1833	14.11	1
scaffold_31163_2598	14.48	1
scaffold_38320_1959	14.48	1
scaffold_128374_188	14.48	1
scaffold_16410_888	15.69	1
scaffold_1276_909	15.69	1	g2687.t1	No BLAST Hit
scaffold_38320_1958	15.69	1
scaffold_25619_774	15.97	1	g23927.t1	XP_004305434 PREDICTED: protein FAR1-RELATED SEQUENCE 5-like [Fragaria vesca subsp. vesca].
scaffold_25619_855	15.97	1	g23927.t1	XP_004305434 PREDICTED: protein FAR1-RELATED SEQUENCE 5-like [Fragaria vesca subsp. vesca].
scaffold_5_30366	15.97	1	g62.t1	XP_003631787 PREDICTED: uncharacterized protein LOC100853519 [Vitis vinifera].
scaffold_93161_158	15.97	1
scaffold_5_2181	15.97	1	g62.t1	XP_003631787 PREDICTED: uncharacterized protein LOC100853519 [Vitis vinifera].
scaffold_5_24523	15.97	1	g62.t1	XP_003631787 PREDICTED: uncharacterized protein LOC100853519 [Vitis vinifera].
scaffold_5_30383	15.97	1	g62.t1	XP_003631787 PREDICTED: uncharacterized protein LOC100853519 [Vitis vinifera].
scaffold_5_24496	16.14	1	g62.t1	XP_003631787 PREDICTED: uncharacterized protein LOC100853519 [Vitis vinifera].
scaffold_25619_730	16.14	1	g23927.t1	XP_004305434 PREDICTED: protein FAR1-RELATED SEQUENCE 5-like [Fragaria vesca subsp. vesca].
scaffold_81281_87	16.14	1
scaffold_2223_1295	16.44	1	g4194.t1	XP_002518085 acid phosphatase, putative [Ricinus communis].
scaffold_152086_169	16.89	1
scaffold_39501_2089	16.89	1
scaffold_144559_357	18.24	1
scaffold_144559_324	18.41	1
scaffold_35569_2846	18.41	1
scaffold_144559_382	18.41	1
scaffold_35569_2857	18.41	1
SCF3551	18.41	1
scaffold_22637_3389	18.41	1	g22257.t1	XP_004301530 PREDICTED: purple acid phosphatase 23 isoform X2 [Fragaria vesca subsp. vesca].
scaffold_39501_2101	18.41	1
scaffold_42029_822	19.24	1
scaffold_32098_1940	19.38	1
scaffold_42029_793	20.58	1
scaffold_7200_6757	20.58	1	g10286.t1	XP_004247828 PREDICTED: 3-ketoacyl-CoA thiolase 2, peroxisomal [Solanum lycopersicum].
scaffold_42029_741	20.58	1
scaffold_7200_6795	20.58	1	g10286.t1	XP_004247828 PREDICTED: 3-ketoacyl-CoA thiolase 2, peroxisomal [Solanum lycopersicum].
scaffold_7200_6806	20.58	1	g10286.t1	XP_004247828 PREDICTED: 3-ketoacyl-CoA thiolase 2, peroxisomal [Solanum lycopersicum].
scaffold_1443_11261	20.58	1	g2956.t1	XP_004247844 PREDICTED: F-box/kelch-repeat protein At3g23880-like [Solanum lycopersicum].
scaffold_93161_251	20.58	1
scaffold_35238_2084	20.58	1
scaffold_93161_127	20.58	1
scaffold_35238_2100	20.58	1
scaffold_426_4354	21.65	1	g1125.t1	XP_002299279 predicted protein [Populus trichocarpa].
scaffold_22637_3414	21.92	1	g22257.t1	XP_004301530 PREDICTED: purple acid phosphatase 23 isoform X2 [Fragaria vesca subsp. vesca].
scaffold_40397_985	22.22	1
scaffold_205740_92	22.22	1
scaffold_131775_75	22.49	1
scaffold_55219_1486	22.62	1
scaffold_15858_3067	22.62	1
scaffold_3612_3319	22.62	1	g6138.t1	XP_002285592 PREDICTED: 7-hydroxymethyl chlorophyll a reductase, chloroplastic [Vitis vinifera].
scaffold_3612_3955	22.62	1	g6138.t1	XP_002285592 PREDICTED: 7-hydroxymethyl chlorophyll a reductase, chloroplastic [Vitis vinifera].
scaffold_31849_429	23.21	1
scaffold_33009_2143	23.21	1
scaffold_143114_330	23.21	1
scaffold_5536_5875	23.88	1
scaffold_5536_5876	23.88	1
scaffold_24552_1898	24.28	1	g23366.t1	XP_002281205 PREDICTED: uncharacterized protein LOC100264495 [Vitis vinifera].
scaffold_10162_13	24.28	1	g13158.t1	No BLAST Hit
scaffold_10162_15	24.28	1	g13158.t1	No BLAST Hit
scaffold_11023_1074	24.28	1	g13953.t1	XP_003597349 hypothetical protein MTR_2g096640 [Medicago truncatula].
scaffold_23397_359	24.28	1
scaffold_16654_4278	24.28	1
scaffold_22318_2907	24.28	1
scaffold_62395_1781	24.41	1
scaffold_62395_1380	25.01	1
scaffold_58422_187	25.01	1
scaffold_115288_495	25.01	1
scaffold_32358_2578	25.21	1
scaffold_58422_200	25.21	1
scaffold_64688_441	25.21	1
scaffold_64688_510	25.21	1
scaffold_8782_6448	25.38	1
scaffold_44732_1519	25.38	1
scaffold_7231_3539	25.38	1	g10308.t1	XP_002437089 hypothetical protein SORBIDRAFT_10g021032, partial [Sorghum bicolor].
scaffold_31190_1690	25.38	1
scaffold_6810_4490	25.38	1	g9891.t1	No BLAST Hit
scaffold_6810_4577	25.38	1	g9891.t1	No BLAST Hit
scaffold_6810_4638	25.38	1	g9891.t1	No BLAST Hit
scaffold_9033_5327	25.38	1	g12058.t1	No BLAST Hit
scaffold_55875_1442	25.47	1
scaffold_6810_4781	25.47	1	g9891.t1	No BLAST Hit
scaffold_9033_5259	25.47	1	g12058.t1	No BLAST Hit
scaffold_6810_7280	25.47	1	g9891.t1	No BLAST Hit
scaffold_45513_1234	28.78	1
scaffold_35977_2889	29.04	1
scaffold_35977_2922	29.04	1
scaffold_36886_1616	29.42	1	g28894.t1	XP_002268984 PREDICTED: uncharacterized protein LOC100244691 [Vitis vinifera].
scaffold_32358_2565	29.42	1
scaffold_6810_4631	29.42	1	g9891.t1	No BLAST Hit
scaffold_64996_1622	29.7	1
scaffold_45085_2098	29.7	1	g31616.t1	No BLAST Hit
scaffold_62603_693	29.7	1
scaffold_3679_2742	29.7	1
scaffold_9288_534	29.7	1	g12308.t1	No BLAST Hit
scaffold_95913_1153	29.7	1
scaffold_7031_3957	29.7	1
scaffold_94985_861	29.7	1
scaffold_16222_2345	29.7	1
scaffold_16222_2363	29.7	1
scaffold_23101_1174	29.7	1
scaffold_23101_1209	29.7	1
scaffold_62258_1328	29.7	1	g35604.t1	No BLAST Hit
scaffold_7031_3963	29.7	1
scaffold_7031_3989	29.7	1
scaffold_97035_859	29.7	1
scaffold_69346_606	29.7	1
scaffold_71372_378	29.7	1
scaffold_71372_415	29.7	1
scaffold_97035_932	29.7	1
scaffold_37334_3131	29.7	1
scaffold_1696_10596	29.7	1	g3375.t1	XP_004242231 PREDICTED: beta-amyrin 28-oxidase-like [Solanum lycopersicum].
scaffold_37334_1854	29.7	1
scaffold_37334_1887	29.7	1
scaffold_37334_1895	29.7	1
scaffold_51715_1701	29.7	1
scaffold_11116_768	29.7	1	g14024.t1	No BLAST Hit
scaffold_73900_869	29.7	1
scaffold_170652_201	29.7	1
scaffold_105430_240	29.7	1
scaffold_20281_1485	29.7	1
scaffold_16334_642	29.7	1
scaffold_6110_904	29.98	1	g9094.t1	XP_004300884 PREDICTED: uncharacterized protein LOC101315056 [Fragaria vesca subsp. vesca].
scaffold_15113_398	29.98	1	g17188.t1	No BLAST Hit
scaffold_7154_809	29.98	1
scaffold_52303_1856	29.98	1
scaffold_15113_423	29.98	1	g17188.t1	No BLAST Hit
scaffold_13815_1292	29.98	1	g16233.t1	XP_002281051 PREDICTED: uncharacterized protein LOC100256073 [Vitis vinifera].
scaffold_156331_44	30.27	1
scaffold_22095_4306	30.27	1
scaffold_22095_4389	30.27	1
scaffold_6151_1214	30.27	1	g9142.t1	XP_002267999 PREDICTED: uncharacterized protein LOC100243242 [Vitis vinifera].
scaffold_62603_729	30.27	1
scaffold_1066_239	30.27	1	g2321.t1	XP_004290021 PREDICTED: membrane-associated 30 kDa protein, chloroplastic [Fragaria vesca subsp. vesca].
scaffold_1066_8647	30.27	1	g2321.t1	XP_004290021 PREDICTED: membrane-associated 30 kDa protein, chloroplastic [Fragaria vesca subsp. vesca].
scaffold_1066_8733	30.27	1	g2321.t1	XP_004290021 PREDICTED: membrane-associated 30 kDa protein, chloroplastic [Fragaria vesca subsp. vesca].
scaffold_156331_52	30.27	1
scaffold_21943_4548	30.27	1
scaffold_26352_1385	30.27	1
scaffold_44200_496	30.27	1
scaffold_15113_397	30.27	1	g17188.t1	No BLAST Hit
scaffold_22095_4371	30.56	1
scaffold_105587_462	30.56	1
SCF43220	30.57	1
scaffold_37328_2503	30.57	1
scaffold_26851_3914	30.57	1
SCF118999	30.57	1
scaffold_192897_179	30.57	1
ct116900	30.57	1
scaffold_44200_416	30.57	1
scaffold_68972_1139	31.2	1
scaffold_2207_9299	31.68	1	g4173.t1	XP_004291027 PREDICTED: NADH dehydrogenase [ubiquinone] iron-sulfur protein 7, mitochondrial [Fragaria vesca subsp. vesca].
SCF3914	31.68	1
scaffold_6645_4506	31.68	1	g9697.t1	No BLAST Hit
scaffold_86507_811	31.68	1	g39038.t1	No BLAST Hit
scaffold_8881_6460	31.68	1	g11920.t1	No BLAST Hit
scaffold_111146_748	31.68	1
scaffold_174202_143	31.68	1
scaffold_29480_3099	31.68	1
scaffold_29633_279	31.68	1	g25875.t1	No BLAST Hit
scaffold_30763_3649	31.68	1
scaffold_3398_4590	31.68	1	g5850.t1	XP_002267999 PREDICTED: uncharacterized protein LOC100243242 [Vitis vinifera].
scaffold_34680_462	31.68	1	g28053.t1	XP_004153220 PREDICTED: uncharacterized protein LOC101209411 [Cucumis sativus].
scaffold_34680_473	31.68	1	g28053.t1	XP_004153220 PREDICTED: uncharacterized protein LOC101209411 [Cucumis sativus].
scaffold_34680_557	31.68	1	g28053.t1	XP_004153220 PREDICTED: uncharacterized protein LOC101209411 [Cucumis sativus].
scaffold_4527_522	31.68	1	g7296.t1	XP_002863332 hypothetical protein ARALYDRAFT_330675 [Arabidopsis lyrata subsp. lyrata].
scaffold_53575_2053	31.68	1
scaffold_5367_5675	31.68	1	g8318.t1	No BLAST Hit
scaffold_63947_427	31.68	1
scaffold_67859_386	31.68	1
scaffold_67859_400	31.68	1
scaffold_67859_401	31.68	1
scaffold_68072_794	31.68	1
scaffold_68972_1184	31.68	1
scaffold_68972_1228	31.68	1
scaffold_78615_581	31.68	1	g38159.t1	No BLAST Hit
scaffold_83777_1061	31.68	1
scaffold_92811_1082	31.68	1
scaffold_94806_161	31.68	1	g39818.t1	XP_004298879 PREDICTED: uncharacterized protein LOC101307011 [Fragaria vesca subsp. vesca].
scaffold_6901_779	31.68	1	g9994.t1	XP_004251994 PREDICTED: acetolactate synthase small subunit 1, chloroplastic [Solanum lycopersicum].
SCF124322	31.68	1
SCF111370	31.68	1
SCF22962	31.68	1
scaffold_17351_2364	31.68	1
scaffold_10692_6504	31.68	1
scaffold_3398_4593	31.68	1	g5850.t1	XP_002267999 PREDICTED: uncharacterized protein LOC100243242 [Vitis vinifera].
scaffold_50850_1690	31.68	1
scaffold_8765_4335	32.27	1	g11805.t1	XP_002515156 monoxygenase, putative [Ricinus communis].
scaffold_10329_3466	32.27	1
scaffold_90664_544	32.27	1
scaffold_90664_610	32.27	1
scaffold_119843_205	32.27	1
scaffold_5336_377	32.27	1	g8285.t1	No BLAST Hit
scaffold_132563_419	32.27	1
scaffold_119843_102	32.27	1
scaffold_119843_175	32.27	1
scaffold_119843_227	32.27	1
scaffold_44369_1307	32.27	1
scaffold_7333_7111	32.27	1	g10408.t1	XP_002285851 PREDICTED: UDP-galactose transporter 1 isoform 2 [Vitis vinifera].
scaffold_132563_418	32.27	1
scaffold_5513_2545	32.27	1
scaffold_5513_2568	32.27	1
SCF8223	32.27	1
scaffold_43010_1033	32.69	1
scaffold_5152_276	32.87	1	g8062.t1	No BLAST Hit
scaffold_51660_1253	33.47	1
scaffold_79987_757	33.47	1
scaffold_57172_1336	33.47	1
scaffold_90664_651	33.47	1
scaffold_10789_423	33.47	1	g13727.t1	No BLAST Hit
scaffold_51963_3413	33.69	1	g33389.t1	No BLAST Hit
scaffold_26473_1684	33.69	1
scaffold_51963_3422	33.69	1	g33389.t1	No BLAST Hit
scaffold_51963_3464	33.69	1	g33389.t1	No BLAST Hit
scaffold_51963_3465	33.69	1	g33389.t1	No BLAST Hit
scaffold_57172_1360	33.69	1
scaffold_63456_1876	33.69	1
scaffold_79987_712	34.06	1
scaffold_16102_1339	34.07	1	g17930.t1	No BLAST Hit
scaffold_26473_2692	34.07	1
scaffold_71150	34.07	1
scaffold_53192_1405	35.26	1
scaffold_69436_1312	35.26	1
scaffold_84577_993	35.66	1
scaffold_2563_1334	35.66	1	g4675.t1	XP_002278571 PREDICTED: small RNA degrading nuclease 5 [Vitis vinifera].
scaffold_48424_1773	35.66	1
scaffold_2850_11183	35.96	1	g5072.t1	NP_565148 carboxyvinyl-carboxyphosphonate phosphorylmutase [Arabidopsis thaliana].
scaffold_2021_8315	36.52	1	g3900.t1	XP_002279972 PREDICTED: disease resistance protein At4g27190 [Vitis vinifera].
scaffold_106934_609	36.52	1
scaffold_56836_1453	37.46	1
scaffold_6701_1445	37.46	1	g9771.t1	XP_004290567 PREDICTED: alcohol dehydrogenase-like [Fragaria vesca subsp. vesca].
scaffold_56836_1478	37.46	1
scaffold_6701_1485	37.46	1	g9771.t1	XP_004290567 PREDICTED: alcohol dehydrogenase-like [Fragaria vesca subsp. vesca].
scaffold_60209_1652	37.46	1
scaffold_8765_2444	37.74	1	g11805.t1	XP_002515156 monoxygenase, putative [Ricinus communis].
scaffold_48424_1719	38.02	1
scaffold_48424_1730	38.02	1
scaffold_106934_593	38.02	1
scaffold_89289_215	38.02	1
scaffold_17020_179	39.51	1	g18609.t1	XP_004299816 PREDICTED: patellin-3-like isoform X1 [Fragaria vesca subsp. vesca].
scaffold_24816_4190	39.76	1	g23510.t1	XP_004159618 PREDICTED: eukaryotic translation initiation factor 3 subunit I-like [Cucumis sativus].
SCF142441	40.43	1
162108_K70	40.72	1
scaffold_36632_1209	41.32	1
scaffold_23861_249	41.32	1	g22978.t1	XP_002308830 predicted protein [Populus trichocarpa].
scaffold_42437_2728	41.32	1
scaffold_36632_1228	41.32	1
scaffold_28685_1160	44.04	1
scaffold_28685_1255	44.33	1
scaffold_9500_1026	44.33	1
scaffold_9500_1040	44.33	1
scaffold_9500_1042	44.33	1
scaffold_4040_6982	44.61	1
scaffold_4719_7228	45.78	1	g7536.t1	XP_002264447 PREDICTED: uncharacterized protein LOC100244450 [Vitis vinifera].
scaffold_2191_10864	45.91	1
scaffold_109817_651	46.1	1
scaffold_58358_2203	46.1	1	g34791.t1	No BLAST Hit
scaffold_58358_2222	46.1	1	g34791.t1	No BLAST Hit
scaffold_85316_876	46.1	1
scaffold_15191_1140	46.1	1
scaffold_3828_4011	46.1	1	g6419.t1	XP_002527722 zinc/iron transporter, putative [Ricinus communis].
scaffold_58358_2070	46.1	1	g34791.t1	No BLAST Hit
scaffold_1941_10112	46.1	1	g3783.t1	XP_002270031 PREDICTED: dof zinc finger protein DOF5.1 [Vitis vinifera].
scaffold_58358_2069	46.1	1	g34791.t1	No BLAST Hit
scaffold_65297_1295	46.75	1
scaffold_54729_2106	48.48	1
scaffold_36507_2247	49.91	1	g28737.t1	XP_004304555 PREDICTED: protein AUXIN SIGNALING F-BOX 2 [Fragaria vesca subsp. vesca].
scaffold_109817_659	49.91	1
scaffold_43499_2223	50.87	1	g31137.t1	XP_002314467 predicted protein, partial [Populus trichocarpa].
scaffold_18824	50.87	1
scaffold_18380	52.06	1
scaffold_4585_8114	53.88	1	g7371.t1	XP_002282117 PREDICTED: protein terminal ear1 [Vitis vinifera].
scaffold_3916_4622	54.74	1
scaffold_1845_9975	54.74	1	g3629.t1	XP_004250878 PREDICTED: signal recognition particle subunit SRP72 [Solanum lycopersicum].
scaffold_4585_4746	54.74	1	g7371.t1	XP_002282117 PREDICTED: protein terminal ear1 [Vitis vinifera].
scaffold_4072_1302	55.02	1	g6736.t1	XP_002266306 PREDICTED: cyclin-dependent kinase G-2 isoform X1 [Vitis vinifera].
scaffold_4072_1319	55.02	1	g6736.t1	XP_002266306 PREDICTED: cyclin-dependent kinase G-2 isoform X1 [Vitis vinifera].
scaffold_3916_8681	55.02	1
scaffold_3916_8685	55.02	1
scaffold_3916_8718	55.02	1
scaffold_3916_8762	55.02	1
scaffold_20504_3658	55.02	1
SCF121995	55.02	1
scaffold_159055_63	55.02	1
scaffold_5427_6061	55.02	1	g8384.t1	XP_002264955 PREDICTED: pre-mRNA-splicing factor ATP-dependent RNA helicase PRP16 [Vitis vinifera].
scaffold_159055_64	55.02	1
scaffold_159055_66	55.02	1
scaffold_21571_4603	55.02	1
scaffold_35254_1878	55.02	1
scaffold_3916_4624	55.02	1
scaffold_15888_1876	55.3	1	g17797.t1	XP_002272590 PREDICTED: ribose-phosphate pyrophosphokinase 4 [Vitis vinifera].
scaffold_15888_1770	55.3	1	g17797.t1	XP_002272590 PREDICTED: ribose-phosphate pyrophosphokinase 4 [Vitis vinifera].
scaffold_21571_4659	55.3	1
scaffold_15888_4098	55.3	1	g17797.t1	XP_002272590 PREDICTED: ribose-phosphate pyrophosphokinase 4 [Vitis vinifera].
scaffold_86009_795	55.3	1
scaffold_6132_4821	55.3	1	g9123.t1	XP_002269864 PREDICTED: 2-phytyl-1,4-beta-naphthoquinone methyltransferase, chloroplastic [Vitis vinifera].
scaffold_15888_1791	55.3	1	g17797.t1	XP_002272590 PREDICTED: ribose-phosphate pyrophosphokinase 4 [Vitis vinifera].
scaffold_15888_1883	55.3	1	g17797.t1	XP_002272590 PREDICTED: ribose-phosphate pyrophosphokinase 4 [Vitis vinifera].
scaffold_86009_799	55.3	1
242569_K70	55.3	1
scaffold_86009_769	55.3	1
scaffold_29472_3905	56.22	1	g25798.t1	XP_002314606 hypothetical protein POPTR_0010s05420g [Populus trichocarpa].
scaffold_17674_2425	58	1
scaffold_10132_4751	58	1	g13125.t1	XP_003628600 Serine/threonine protein phosphatase [Medicago truncatula].
scaffold_17674_2151	58.14	1
scaffold_22145_992	58.14	1	g21971.t1	XP_004292284 PREDICTED: uncharacterized protein LOC101301940 [Fragaria vesca subsp. vesca].
scaffold_17674_2355	58.14	1
scaffold_105955_554	58.14	1
scaffold_17674_2189	58.14	1
scaffold_17674_2195	58.14	1
scaffold_22145_994	58.14	1	g21971.t1	XP_004292284 PREDICTED: uncharacterized protein LOC101301940 [Fragaria vesca subsp. vesca].
scaffold_23359_736	58.28	1
scaffold_178819_151	58.28	1
scaffold_22145_997	58.28	1	g21971.t1	XP_004292284 PREDICTED: uncharacterized protein LOC101301940 [Fragaria vesca subsp. vesca].
scaffold_87722_519	58.28	1
scaffold_87722_526	58.28	1
scaffold_4844_3525	60.76	1
scaffold_25405_879	62.75	1
scaffold_25405_895	62.75	1
scaffold_25405_908	62.75	1
1trimcontig440230	62.75	1
scaffold_30788_3800	62.99	1	g26425.t1	XP_002311870 predicted protein [Populus trichocarpa].
scaffold_18085_4194	62.99	1
scaffold_1447_12035	62.99	1	g2961.t1	XP_002275229 PREDICTED: sphinganine C(4)-monooxygenase 1 [Vitis vinifera].
SCF59248	62.99	1
scaffold_1447_12107	62.99	1	g2961.t1	XP_002275229 PREDICTED: sphinganine C(4)-monooxygenase 1 [Vitis vinifera].
scaffold_23849_3755	63.89	1
scaffold_72495_1145	63.89	1
SCF102347	64.25	1
scaffold_120553_245	64.25	1
scaffold_8_9904	64.25	1	g70.t1	XP_002314912 glucosyltransferase like family protein [Populus trichocarpa].
scaffold_120553_193	64.25	1
scaffold_8_9959	65.43	1	g70.t1	XP_002314912 glucosyltransferase like family protein [Populus trichocarpa].
scaffold_12191_2925	65.43	1	g14905.t1	XP_002316008 hypothetical protein POPTR_0010s14920g [Populus trichocarpa].
scaffold_12660_440	65.74	1	g15278.t1	XP_004155342 PREDICTED: nucleobase-ascorbate transporter 7-like [Cucumis sativus].
scaffold_56373_2256	66.53	1
scaffold_55812_1447	67.24	1
scaffold_38000_2149	67.24	1	g29302.t1	No BLAST Hit
scaffold_62235_1297	67.24	1	g35600.t1	XP_004239086 PREDICTED: cell division topological specificity factor homolog, chloroplastic [Solanum lycopersicum].
scaffold_2511_7388	67.24	1	g4602.t1	XP_002273322 PREDICTED: nucleolar protein 14-like [Vitis vinifera].
scaffold_1308_10338	67.82	1	g2740.t1	XP_003633654 PREDICTED: 26S proteasome non-ATPase regulatory subunit 11 [Vitis vinifera].
scaffold_1882_4031	67.82	1	g3687.t1	XP_004172781 PREDICTED: F-box only protein 21-like, partial [Cucumis sativus].
scaffold_1308_10342	67.82	1	g2740.t1	XP_003633654 PREDICTED: 26S proteasome non-ATPase regulatory subunit 11 [Vitis vinifera].
scaffold_18995_3804	67.82	1	g19952.t1	XP_004297278 PREDICTED: uncharacterized protein LOC101298217 [Fragaria vesca subsp. vesca].
scaffold_25310_4356	67.82	1	g23759.t1	XP_002311433 basic helix-loop-helix family protein [Populus trichocarpa].
scaffold_13331_170	67.82	1	g15839.t1	XP_002280608 PREDICTED: phosphate transporter PHO1 homolog 1 isoform 1 [Vitis vinifera].
scaffold_58464_535	67.82	1
scaffold_1882_4015	67.82	1	g3687.t1	XP_004172781 PREDICTED: F-box only protein 21-like, partial [Cucumis sativus].
scaffold_31560_3806	67.82	1
scaffold_81148_991	68.75	1
scaffold_2119_6852	69.31	1	g4036.t1	XP_002315964 predicted protein [Populus trichocarpa].
scaffold_24926_462	70.8	1	g23566.t1	XP_002529154 conserved hypothetical protein [Ricinus communis].
scaffold_220971_127	71.14	1
scaffold_5332_2697	71.14	1	g8281.t1	XP_003555898 PREDICTED: uncharacterized protein LOC100815402 [Glycine max].
scaffold_24204_1142	73.53	1
scaffold_24204_1208	73.53	1
scaffold_24204_1211	73.53	1
scaffold_70204_1236	74	1
scaffold_119621_277	74	1
scaffold_34549_2167	74	1
scaffold_5270_4642	74	1	g8190.t1	XP_002264932 PREDICTED: heterogeneous nuclear ribonucleoprotein A1, A2/B1 homolog [Vitis vinifera].
scaffold_35265_2858	74	1
scaffold_35265_2899	74	1
scaffold_59364_401	74.28	1
scaffold_34549_1228	74.28	1
scaffold_50786_1268	74.28	1
scaffold_53970_2131	74.28	1
scaffold_28885_1664	76.08	1
scaffold_104714_73	76.08	1
scaffold_28885_1694	76.08	1
scaffold_23247_1453	76.08	1	g22612.t1	XP_002265072 PREDICTED: uncharacterized oxidoreductase At4g09670-like [Vitis vinifera].
scaffold_7704_6652	76.08	1
scaffold_7704_6677	76.08	1
scf11l	76.17	1
scaffold_4292_3103	76.17	1	g7010.t1	XP_002267999 PREDICTED: uncharacterized protein LOC100243242 [Vitis vinifera].
scaffold_26291	76.43	1
scaffold_3315_926	76.55	1	g5732.t1	XP_002270403 PREDICTED: armadillo repeat-containing protein 7 isoform X1 [Vitis vinifera].
scaffold_177375_210	77.27	1
1trimcontig238795	77.27	1
scaffold_177375_241	77.27	1
scaffold_1399_7325	77.4	1	g2884.t1	XP_002266918 PREDICTED: uncharacterized oxidoreductase At4g09670 isoform 2 [Vitis vinifera].
scaffold_23562_4626	77.4	1
scaffold_22_11172	77.4	1	g121.t1	XP_002264617 PREDICTED: cleavage stimulating factor 64 [Vitis vinifera].
scaffold_22_11196	77.4	1	g121.t1	XP_002264617 PREDICTED: cleavage stimulating factor 64 [Vitis vinifera].
scaffold_41901_298	77.86	1
scaffold_29336_265	78.6	1	g25737.t1	XP_004302290 PREDICTED: alkaline/neutral invertase A, mitochondrial [Fragaria vesca subsp. vesca].
scaffold_35108_2163	81.39	1
scaffold_22192_2071	81.39	1
scaffold_22192_4274	81.39	1
scaffold_78314_1267	81.39	1
scaffold_35108_2080	81.39	1
scaffold_4184_766	81.39	1	g6870.t1	XP_002277366 PREDICTED: uncharacterized protein LOC100266586 [Vitis vinifera].
scaffold_9812_7345	81.39	1	g12802.t1	NP_001235544 uncharacterized protein LOC100527400 [Glycine max].
scaffold_93026_936	81.39	1
scaffold_35108_2089	82.85	1
scaffold_93026_883	82.85	1
scaffold_26887_942	82.85	1	g24570.t1	XP_002329158 BED finger-nbs-lrr resistance protein [Populus trichocarpa].
scaffold_93026_886	82.85	1
scaffold_4180_1919	83.77	1	g6867.t1	XP_002276683 PREDICTED: serine/threonine-protein kinase haspin-like [Vitis vinifera].
scaffold_4180_1926	83.77	1	g6867.t1	XP_002276683 PREDICTED: serine/threonine-protein kinase haspin-like [Vitis vinifera].
scaffold_16235_5089	85.23	1	g18021.t1	XP_004230350 PREDICTED: pleiotropic drug resistance protein 3 isoform X1 [Solanum lycopersicum].
scaffold_5299_7068	85.23	1	g8241.t1	XP_004230379 PREDICTED: LOW QUALITY PROTEIN: transmembrane protein 184A-like [Solanum lycopersicum].
scaffold_77055_270	85.23	1
SCF11186	85.23	1
1trimcontig179737	85.57	1
scaffold_20176_1206	88.55	1
scaffold_4476_2515	88.55	1	g7236.t1	XP_002266845 PREDICTED: uncharacterized protein LOC100264813 [Vitis vinifera].
scaffold_3121_10812	88.55	1	g5459.t1	XP_002326594 predicted protein [Populus trichocarpa].
scaffold_20176_973	88.55	1
vm23232	88.91	1
scaffold_208552_89	88.91	1
scaffold_83550_1274	88.91	1
scaffold_10376_2956	89.4	1	g13358.t1	XP_002331115 predicted protein [Populus trichocarpa].
scaffold_9212_6745	90.51	1
scaffold_119452_364	90.51	1
scaffold_10376_3074	90.93	1	g13358.t1	XP_002331115 predicted protein [Populus trichocarpa].
scaffold_105165_459	92.18	1
scaffold_105165_461	92.18	1
scaffold_105165_468	92.18	1
scaffold_74837_389	92.36	1
scaffold_25202_2559	92.36	1	g23704.t1	No BLAST Hit
scaffold_4295_3383	92.36	1	g7015.t1	XP_002267907 PREDICTED: uncharacterized protein LOC100253141 [Vitis vinifera].
scaffold_37124_691	92.36	1	g28981.t1	XP_002268924 PREDICTED: potassium channel AKT2/3 [Vitis vinifera].
scaffold_25202_2628	92.89	1	g23704.t1	No BLAST Hit
scaffold_55945_713	92.89	1
scaffold_4295_3439	92.89	1	g7015.t1	XP_002267907 PREDICTED: uncharacterized protein LOC100253141 [Vitis vinifera].
scaffold_4447_7543	92.89	1	g7206.t1	XP_002273298 PREDICTED: uncharacterized protein LOC100248070 isoform X1 [Vitis vinifera].
scaffold_57438_750	92.89	1
scaffold_74837_396	92.89	1
1trimcontig239742	92.89	1
SCF149633	92.89	1
scaffold_36351_426	92.95	1
scaffold_10652_604	92.95	1	g13610.t1	XP_002263770 PREDICTED: abhydrolase domain-containing protein 3 [Vitis vinifera].
scf8l	94.75	1
scaffold_25202_2578	94.75	1	g23704.t1	No BLAST Hit
GVC-C347_380	94.75	1
scaffold_33693_971	94.93	1	g27658.t1	XP_002270155 PREDICTED: glutelin type-A 3 [Vitis vinifera].
scaffold_33693_976	94.93	1	g27658.t1	XP_002270155 PREDICTED: glutelin type-A 3 [Vitis vinifera].
SCF3362	94.93	1
scaffold_718_4495	94.93	1	g1713.t1	XP_003592989 ATP-dependent DNA helicase Q1 [Medicago truncatula].
SCF173212	95.35	1
scaffold_185_4067	95.35	1	g572.t1	XP_003538286 PREDICTED: magnesium transporter MRS2-3-like isoform 1 [Glycine max].
scaffold_33693_964	95.35	1	g27658.t1	XP_002270155 PREDICTED: glutelin type-A 3 [Vitis vinifera].
scaffold_1825_2668	96.39	1	g3588.t1	XP_002307493 ubiquinol-cytochrome C reductase complex 7.8 kDa family protein [Populus trichocarpa].
SCF30816	96.39	1
scaffold_1825_2736	97.96	1	g3588.t1	XP_002307493 ubiquinol-cytochrome C reductase complex 7.8 kDa family protein [Populus trichocarpa].
scaffold_13468_4506	97.96	1	g15946.t1	XP_002268923 PREDICTED: high affinity sulfate transporter 2-like [Vitis vinifera].
scaffold_81716_1234	100.35	1
scaffold_357_3567	100.35	1	g978.t1	XP_002532766 fructose-1,6-bisphosphatase, putative [Ricinus communis].
1trimcontig182430	100.35	1
scaffold_13082_2198	100.74	1	g15646.t1	XP_004230625 PREDICTED: putative glutamine amidotransferase YLR126C [Solanum lycopersicum].
scaffold_22372_4239	100.74	1
scaffold_23231_3533	100.74	1	g22599.t1	XP_003635191 PREDICTED: K(+) efflux antiporter 3, chloroplastic-like [Vitis vinifera].
scaffold_120913_200	101.03	1
scaffold_120913_306	101.03	1
scaffold_120913_399	101.03	1
scaffold_120913_429	101.03	1
scaffold_12871_3707	101.03	1	g15456.t1	XP_002275785 PREDICTED: pyruvate kinase isozyme A, chloroplastic [Vitis vinifera].
scaffold_29057_3354	101.6	1
scaffold_13082_2190	101.6	1	g15646.t1	XP_004230625 PREDICTED: putative glutamine amidotransferase YLR126C [Solanum lycopersicum].
scaffold_13178_3759	102.54	1	g15726.t1	XP_002518332 kinase, putative [Ricinus communis].
scaffold_15803_354	102.73	1	g17726.t1	XP_002271143 PREDICTED: receptor-like protein kinase HAIKU2 [Vitis vinifera].
scaffold_33830_310	102.73	1
scaffold_20280_2588	102.73	1
scaffold_20280_2609	102.73	1
scaffold_21342_3504	102.73	1
scaffold_21342_3517	102.73	1
scaffold_23231_3543	102.73	1	g22599.t1	XP_003635191 PREDICTED: K(+) efflux antiporter 3, chloroplastic-like [Vitis vinifera].
scaffold_49208_980	102.73	1
scaffold_49208_996	102.73	1
SCF117157	102.73	1
scaffold_17261_2727	102.73	1	g18773.t1	XP_004230675 PREDICTED: serine/threonine-protein kinase TOR isoform X2 [Solanum lycopersicum].
scaffold_33830_309	102.73	1
scaffold_60018_985	102.73	1
scaffold_32417_1276	102.73	1
scaffold_19539_410	103.15	1	g20301.t1	XP_002309943 predicted protein, partial [Populus trichocarpa].
scaffold_75017_350	105.72	1
scaffold_134769_24	105.72	1
scaffold_134769_26	105.72	1
scaffold_134769_48	105.72	1
scaffold_37308_1692	105.72	1
scaffold_75017_264	105.72	1
scaffold_75017_271	105.72	1
scaffold_75017_368	105.72	1
scaffold_75017_369	105.72	1
scaffold_85998_175	105.72	1
scaffold_85998_177	105.72	1
scaffold_12760_4346	105.72	1	g15372.t1	XP_002264556 PREDICTED: endo-1,4-beta-xylanase A-like [Vitis vinifera].
scaffold_30424_1045	105.72	1
scaffold_53004_1821	105.72	1
scaffold_32417_1192	105.72	1
scaffold_32417_1191	106.17	1
scaffold_12748_4086	106.91	1	g15363.t1	XP_004230737 PREDICTED: PRKR-interacting protein 1 [Solanum lycopersicum].
scaffold_12748_4096	106.91	1	g15363.t1	XP_004230737 PREDICTED: PRKR-interacting protein 1 [Solanum lycopersicum].
scaffold_12748_4108	106.91	1	g15363.t1	XP_004230737 PREDICTED: PRKR-interacting protein 1 [Solanum lycopersicum].
scaffold_12748_4113	106.91	1	g15363.t1	XP_004230737 PREDICTED: PRKR-interacting protein 1 [Solanum lycopersicum].
scaffold_143834_336	106.91	1
scaffold_143834_346	106.91	1
SCF23691	106.91	1
scaffold_40112_1958	106.91	1
SCF39242	106.91	1
scaffold_32660_3157	106.91	1
SCF69981	106.91	1
scaffold_15885_2425	106.91	1	g17795.t1	NP_001235533 uncharacterized protein LOC100527911 [Glycine max].
scaffold_21220_951	106.91	1	g21409.t1	XP_002518787 zinc metalloprotease, putative [Ricinus communis].
scaffold_64976_957	107.38	1
scaffold_3011_100	107.52	1	g5300.t1	XP_003631624 PREDICTED: uncharacterized protein LOC100855234 [Vitis vinifera].
scaffold_29457_199	107.69	1
scaffold_56057_466	107.69	1	g34273.t1	XP_002270710 PREDICTED: TIP41-like protein-like [Vitis vinifera].
scaffold_3011_105	107.69	1	g5300.t1	XP_003631624 PREDICTED: uncharacterized protein LOC100855234 [Vitis vinifera].
scaffold_1263_678	108.1	1	g2665.t1	XP_004231416 PREDICTED: putative B3 domain-containing protein At5g66980-like [Solanum lycopersicum].
vm89040	108.1	1
SCF29735	108.1	1
scaffold_12667_2566	108.1	1
scaffold_14392_2540	108.1	1
scaffold_55690_808	108.1	1
scaffold_8541_630	109.29	1	g11570.t1	XP_002305430 myb family transcription factor family protein [Populus trichocarpa].
scaffold_2363_13188	110.2	1	g4410.t1	XP_004302207 PREDICTED: 40S ribosomal protein S25-like [Fragaria vesca subsp. vesca].
scaffold_2363_13195	110.2	1	g4410.t1	XP_004302207 PREDICTED: 40S ribosomal protein S25-like [Fragaria vesca subsp. vesca].
scaffold_20974_630	110.2	1	g21236.t1	XP_002519100 multidrug resistance pump, putative [Ricinus communis].
scaffold_7741_2262	110.2	1	g10796.t1	XP_002512570 s-adenosylmethionine synthetase, putative [Ricinus communis].
scaffold_56474_920	110.2	1
scaffold_56474_949	110.2	1
SCF125768	110.2	1
SCF142785	110.2	1
SCF42549	110.2	1
scaffold_12386_3788	111.98	1
SCF208509	111.98	1
scaffold_155015_128	112.82	1
scaffold_14647_1415	113.13	1	g16852.t1	XP_002306201 hypothetical protein POPTR_0004s18500g [Populus trichocarpa].
scaffold_34330_3092	113.13	1
scaffold_35593_3209	113.13	1
scaffold_48000_2086	113.13	1
scaffold_86480_585	113.13	1
scaffold_48000_2071	113.92	1
scaffold_50439_2370	113.92	1
scaffold_50439_2379	113.92	1
SCF172019	113.92	1
SCF153722	113.92	1
scaffold_73469_1298	113.92	1
scaffold_50439_2380	114.75	1
scaffold_50439_2377	114.75	1
scaffold_4354_5518	114.75	1	g7086.t1	XP_002283145 PREDICTED: expansin-A20 [Vitis vinifera].
scaffold_50439_2378	114.75	1
scaffold_77830_839	114.75	1
scaffold_78313_985	114.75	1
SCF68870	115.88	1
SCF31394	0	2
SCF77145	0	2
SCF180863	1.11e-16	2
scaffold_10676_6243	0.6	2	g13632.t1	XP_004242830 PREDICTED: uncharacterized protein LOC101263427 [Solanum lycopersicum].
scaffold_13509_2315	0.6	2
scaffold_13509_2317	0.6	2
scaffold_13509_2319	0.6	2
scaffold_2384_2172	0.6	2	g4432.t1	XP_003633168 PREDICTED: probable LRR receptor-like serine/threonine-protein kinase At4g30520 [Vitis vinifera].
scaffold_9857_2071	0.6	2	g12845.t1	XP_002270118 PREDICTED: uncharacterized protein LOC100266808 [Vitis vinifera].
scaffold_83870_340	1.2	2
scaffold_20949_637	1.79	2
scaffold_89883_102	1.79	2
scaffold_3096_4391	1.79	2	g5419.t1	No BLAST Hit
SCF22434	1.79	2
1trimcontig178358	1.79	2
scaffold_2541_816	1.79	2	g4646.t1	XP_002307856 ATPase 6 family protein [Populus trichocarpa].
scaffold_2541_767	1.79	2	g4646.t1	XP_002307856 ATPase 6 family protein [Populus trichocarpa].
scaffold_147251_269	1.79	2
scaffold_43659_2956	2.26	2
scaffold_9857_1606	2.38	2	g12845.t1	XP_002270118 PREDICTED: uncharacterized protein LOC100266808 [Vitis vinifera].
scaffold_36026_1634	2.38	2
scaffold_9857_2056	2.38	2	g12845.t1	XP_002270118 PREDICTED: uncharacterized protein LOC100266808 [Vitis vinifera].
scaffold_13767_3213	2.38	2	g16193.t1	XP_004287240 PREDICTED: uncharacterized methyltransferase At2g41040, chloroplastic-like isoform X1 [Fragaria vesca subsp. vesca].
scaffold_3676_5270	2.38	2	g6231.t1	XP_003633105 PREDICTED: nuclear pore complex protein Nup205-like [Vitis vinifera].
scaffold_12021_5513	2.38	2
scaffold_12021_5517	2.38	2
scaffold_12021_5515	2.38	2
scaffold_2976_6488	2.98	2	g5243.t1	XP_001619960 hypothetical protein NEMVEDRAFT_v1g149662, partial [Nematostella vectensis].
scaffold_30505_2172	2.98	2	g26300.t1	XP_002526240 conserved hypothetical protein [Ricinus communis].
scaffold_28974_3273	2.98	2
scaffold_63852_1018	2.98	2
GVC-C722_207	2.98	2
scaffold_2584_807	2.98	2	g4712.t1	No BLAST Hit
scaffold_2584_844	2.98	2	g4712.t1	No BLAST Hit
scaffold_12021_5334	2.98	2
scaffold_43659_2933	2.98	2
scaffold_5473_3860	2.98	2
scaffold_84361_181	2.98	2
SCF127382	2.98	2
scaffold_36026_1605	4.17	2
scaffold_2541_856	4.17	2	g4646.t1	XP_002307856 ATPase 6 family protein [Populus trichocarpa].
scaffold_14212_2887	4.17	2
scaffold_214_19356	4.17	2	g646.t1	XP_003617265 hypothetical protein MTR_5g089680 [Medicago truncatula].
scaffold_28974_3302	4.17	2
scaffold_38482_1050	4.17	2
scaffold_79510_407	4.17	2
scaffold_89214_1033	4.17	2
scaffold_5355_5289	5.06	2	g8305.t1	XP_002324990 hypothetical protein POPTR_0018s08740g [Populus trichocarpa].
scaffold_5355_5299	5.26	2	g8305.t1	XP_002324990 hypothetical protein POPTR_0018s08740g [Populus trichocarpa].
scaffold_5355_5345	5.26	2	g8305.t1	XP_002324990 hypothetical protein POPTR_0018s08740g [Populus trichocarpa].
scaffold_11068_2124	5.75	2	g13983.t1	XP_002514212 transferase, transferring pentosyl groups, putative [Ricinus communis].
scaffold_21168_3751	6.45	2
scaffold_6420_7410	7.44	2	g9451.t1	XP_004239270 PREDICTED: uncharacterized protein LOC101266511 [Solanum lycopersicum].
scaffold_6420_7453	7.44	2	g9451.t1	XP_004239270 PREDICTED: uncharacterized protein LOC101266511 [Solanum lycopersicum].
scaffold_11068_3570	8.03	2	g13983.t1	XP_002514212 transferase, transferring pentosyl groups, putative [Ricinus communis].
scaffold_11068_2064	8.03	2	g13983.t1	XP_002514212 transferase, transferring pentosyl groups, putative [Ricinus communis].
scaffold_18666_1489	8.03	2
scaffold_35837_2667	8.03	2
scaffold_6895_6201	8.66	2	g9987.t1	XP_002326280 predicted protein [Populus trichocarpa].
SCF74458	11.31	2
scf28l	11.31	2
scaffold_37691_1239	11.31	2	g29189.t1	XP_004243715 PREDICTED: auxin-binding protein ABP19a-like [Solanum lycopersicum].
SCF965	11.86	2
scaffold_15195_272	12.09	2	g17258.t1	XP_002279119 PREDICTED: MOB kinase activator-like 1 [Vitis vinifera].
scaffold_15195_299	12.09	2	g17258.t1	XP_002279119 PREDICTED: MOB kinase activator-like 1 [Vitis vinifera].
scaffold_60325_509	12.85	2	g35218.t1	XP_002267628 PREDICTED: cytochrome P450 89A2-like [Vitis vinifera].
scaffold_20344_4796	12.87	2
scaffold_59091_93	13.06	2
scaffold_4009_1688	13.06	2	g6660.t1	XP_002276214 PREDICTED: 3-oxoacyl-[acyl-carrier-protein] synthase II, chloroplastic [Vitis vinifera].
scaffold_4009_5196	13.06	2	g6660.t1	XP_002276214 PREDICTED: 3-oxoacyl-[acyl-carrier-protein] synthase II, chloroplastic [Vitis vinifera].
scaffold_60325_513	13.06	2	g35218.t1	XP_002267628 PREDICTED: cytochrome P450 89A2-like [Vitis vinifera].
scaffold_10943_5950	13.2	2	g13870.t1	XP_002267090 PREDICTED: adenylate cyclase, terminal-differentiation specific [Vitis vinifera].
scaffold_10943_5979	13.2	2	g13870.t1	XP_002267090 PREDICTED: adenylate cyclase, terminal-differentiation specific [Vitis vinifera].
scaffold_37193_863	13.2	2
scaffold_30156_3305	13.69	2
scaffold_59091_171	13.69	2
scaffold_53065_1508	13.69	2
scaffold_59091_194	13.69	2
scaffold_21621_4463	13.99	2
scaffold_2905_4757	13.99	2	g5150.t1	XP_002866019 hypothetical protein ARALYDRAFT_495496 [Arabidopsis lyrata subsp. lyrata].
SCF26049	13.99	2
SCF77376	13.99	2
scaffold_14281_3522	14.28	2
scaffold_2039_12007	14.28	2	g3923.t1	NP_001234146 serine/threonine protein kinase pk23 [Solanum lycopersicum].
scaffold_2039_12023	14.28	2	g3923.t1	NP_001234146 serine/threonine protein kinase pk23 [Solanum lycopersicum].
1trimcontig351427	14.28	2
scaffold_44658_871	14.69	2	g31486.t1	XP_002267865 PREDICTED: glutamate synthase 1 [NADH], chloroplastic isoform X1 [Vitis vinifera].
scaffold_44658_866	14.69	2	g31486.t1	XP_002267865 PREDICTED: glutamate synthase 1 [NADH], chloroplastic isoform X1 [Vitis vinifera].
314761_K63	14.83	2
scaffold_6652_6608	17.05	2	g9705.t1	No BLAST Hit
scaffold_6652_6663	17.05	2	g9705.t1	No BLAST Hit
scaffold_18165_2403	17.05	2	g19406.t1	XP_002266878 PREDICTED: uncharacterized protein LOC100255280 [Vitis vinifera].
scaffold_18165_2494	17.05	2	g19406.t1	XP_002266878 PREDICTED: uncharacterized protein LOC100255280 [Vitis vinifera].
scaffold_18165_2517	17.05	2	g19406.t1	XP_002266878 PREDICTED: uncharacterized protein LOC100255280 [Vitis vinifera].
scaffold_5293_2250	17.68	2	g8229.t1	XP_004234194 PREDICTED: uncharacterized protein At3g49140-like [Solanum lycopersicum].
scaffold_94_21967	18.83	2	g327.t1	XP_002266751 PREDICTED: uncharacterized protein LOC100243267 [Vitis vinifera].
scaffold_4235_7663	19.17	2	g6938.t1	XP_002266509 PREDICTED: protein timeless homolog [Vitis vinifera].
scaffold_21885_2681	19.17	2	g21813.t1	XP_002276546 PREDICTED: UDP-glycosyltransferase 88A1-like [Vitis vinifera].
scaffold_14440_626	19.6	2	g16707.t1	XP_002513671 Anthranilate N-benzoyltransferase protein, putative [Ricinus communis].
scaffold_14440_592	21.04	2	g16707.t1	XP_002513671 Anthranilate N-benzoyltransferase protein, putative [Ricinus communis].
scaffold_14440_636	21.04	2	g16707.t1	XP_002513671 Anthranilate N-benzoyltransferase protein, putative [Ricinus communis].
scaffold_57811_1716	21.04	2
scaffold_8019_6341	21.4	2	g11077.t1	No BLAST Hit
scaffold_21380_2128	21.4	2	g21495.t1	No BLAST Hit
scaffold_28792_1608	22.53	2
scaffold_588_14282	22.53	2	g1476.t1	XP_002317423 hypothetical protein POPTR_0011s07390g [Populus trichocarpa].
scaffold_18254_1032	22.53	2
scaffold_28792_1656	22.53	2
scaffold_32004_3608	22.53	2
scaffold_8019_6359	22.53	2	g11077.t1	No BLAST Hit
SCF13771	22.53	2
scaffold_798_5968	22.53	2	g1862.t1	XP_003629517 Major pollen allergen-like protein [Medicago truncatula].
scaffold_6892_1884	22.53	2	g9981.t1	XP_002318805 HCF106 family protein [Populus trichocarpa].
scaffold_8019_206	22.53	2	g11077.t1	No BLAST Hit
scaffold_8019_211	22.53	2	g11077.t1	No BLAST Hit
scaffold_14052_6230	23.62	2	g16422.t1	XP_002510788 KDEL motif-containing protein 1 precursor, putative [Ricinus communis].
scaffold_8755_2482	23.7	2	g11798.t1	XP_002272264 PREDICTED: homeobox-leucine zipper protein ANTHOCYANINLESS 2 isoform X1 [Vitis vinifera].
scaffold_8659_3231	23.92	2	g11697.t1	XP_004234363 PREDICTED: E3 ubiquitin ligase BIG BROTHER-like [Solanum lycopersicum].
scaffold_97957_626	23.92	2
scaffold_97957_613	23.92	2
scaffold_121393_268	23.92	2
scaffold_49612_430	23.92	2
29080_K63	23.92	2
scaffold_50215_1124	24.15	2
scaffold_24850_1925	24.81	2	g23523.t1	XP_002318837 predicted protein [Populus trichocarpa].
scaffold_42460_234	25.62	2
scaffold_64776_1169	25.62	2
scaffold_63671_1144	25.64	2
scaffold_54731_1330	28.18	2
scaffold_3428_6768	28.18	2
scaffold_38278	28.18	2
scaffold_64776_1140	28.18	2
scaffold_64776_966	28.18	2
scaffold_67934_526	28.18	2
scaffold_3428_10483	28.18	2
scaffold_43835_1332	28.18	2
scaffold_82980_1281	28.18	2
scaffold_30508_492	28.18	2
SCF83079	28.18	2
scaffold_51254_1480	28.18	2	g33227.t1	XP_002266955 PREDICTED: pollen-specific leucine-rich repeat extensin-like protein 2 [Vitis vinifera].
scaffold_67934_527	28.18	2
scaffold_56893_1962	28.81	2
scaffold_13716_1275	29.37	2	g16152.t1	XP_002269540 PREDICTED: LRR receptor-like serine/threonine-protein kinase ERL2-like [Vitis vinifera].
ct130570	29.37	2
scaffold_50432_741	34.65	2
scaffold_50432_753	34.65	2
372875_K63	34.75	2
scaffold_33602_383	34.75	2	g27624.t1	No BLAST Hit
scaffold_740_2149	35.7	2	g1756.t1	XP_002318288 hypothetical protein POPTR_0012s14660g [Populus trichocarpa].
scaffold_104502_88	35.7	2
scaffold_2429_10453	36.02	2	g4487.t1	No BLAST Hit
scaffold_42093_407	36.57	2
SCF73288	37.13	2
scaffold_183992_83	37.13	2
scaffold_183992_126	37.13	2
scaffold_5976_6782	37.37	2	g8959.t1	XP_002526240 conserved hypothetical protein [Ricinus communis].
scaffold_10842_3283	37.37	2	g13772.t1	XP_002304303 hypothetical protein POPTRDRAFT_830729 [Populus trichocarpa].
scaffold_12794_3674	37.37	2	g15395.t1	XP_002277737 PREDICTED: ATP-dependent DNA helicase pcrA-like [Vitis vinifera].
scaffold_2126_10221	37.94	2
scaffold_20891_2586	37.94	2	g21184.t1	XP_002263160 PREDICTED: UMP-CMP kinase [Vitis vinifera].
scaffold_42093_373	37.94	2
scaffold_5955_3066	39.13	2	g8936.t1	No BLAST Hit
scaffold_99178_612	39.13	2
CA325	39.13	2
CA325_205	39.13	2
scaffold_45738_584	39.13	2
SCF130642	39.13	2
scaffold_19388_2399	39.13	2
scaffold_27618_3168	39.13	2
scaffold_27618_3212	39.13	2
scaffold_27618_3239	39.13	2
scaffold_4325_9150	39.13	2
scaffold_69654_1568	39.72	2
scaffold_69654_1606	39.72	2
SCF158988	39.72	2
SCF48645	40.85	2
scaffold_12794_3735	40.85	2	g15395.t1	XP_002277737 PREDICTED: ATP-dependent DNA helicase pcrA-like [Vitis vinifera].
scaffold_7862_3704	41.08	2	g10925.t1	XP_003523276 PREDICTED: expansin-A8-like [Glycine max].
scaffold_7862_3753	41.08	2	g10925.t1	XP_003523276 PREDICTED: expansin-A8-like [Glycine max].
scaffold_7862_3707	41.51	2	g10925.t1	XP_003523276 PREDICTED: expansin-A8-like [Glycine max].
scaffold_20649_2180	42.11	2
scaffold_38952_3144	42.11	2
scaffold_38952_3145	42.11	2
scaffold_10951_6083	42.11	2	g13876.t1	XP_002325928 predicted protein [Populus trichocarpa].
scaffold_62678_1430	42.11	2
scaffold_1741_1992	43.3	2	g3457.t1	NP_001141266 uncharacterized protein LOC100273355 [Zea mays].
scaffold_20649_2179	43.3	2
ct124256	43.3	2
scaffold_7209_3534	43.3	2
scaffold_7209_3538	43.3	2
scaffold_46664_1276	43.3	2	g32067.t1	No BLAST Hit
scaffold_1741_1883	43.42	2	g3457.t1	NP_001141266 uncharacterized protein LOC100273355 [Zea mays].
ct155461	43.42	2
scaffold_15222_4143	43.42	2	g17271.t1	No BLAST Hit
scaffold_7702_6276	43.42	2	g10756.t1	XP_004240868 PREDICTED: superoxide dismutase [Mn], mitochondrial [Solanum lycopersicum].
scaffold_44516_2479	43.42	2
scaffold_48048_1608	43.64	2
scaffold_44145_2859	47.4	2
ct89348	47.79	2
scaffold_74218_403	48.26	2
scaffold_102465_607	49.29	2	g40414.t1	XP_002312162 oxidoreductase family protein [Populus trichocarpa].
scaffold_33914_312	49.29	2	g27758.t1	No BLAST Hit
scaffold_14228_1030	49.29	2
scaffold_102465_648	49.29	2	g40414.t1	XP_002312162 oxidoreductase family protein [Populus trichocarpa].
scaffold_77675_473	49.39	2
scaffold_14228_1001	49.39	2
scaffold_12807_2478	49.99	2
scaffold_33914_316	50.21	2	g27758.t1	No BLAST Hit
scaffold_12807_2613	50.21	2
scaffold_20227_2484	50.21	2
scaffold_33914_306	50.21	2	g27758.t1	No BLAST Hit
scf2000b	50.21	2
scaffold_12807_2487	50.25	2
scaffold_59431_989	51.49	2
scaffold_121399_74	51.49	2
scaffold_40835_805	51.49	2	g30284.t1	XP_002282536 PREDICTED: BTB/POZ and MATH domain-containing protein 3 isoform X1 [Vitis vinifera].
scaffold_12515_669	51.78	2
scaffold_7563_4960	51.91	2
scaffold_27196_4009	52.48	2
scaffold_51491_921	52.48	2
scaffold_19028_2696	52.48	2
scaffold_19028_2776	52.48	2
scaffold_59431_1002	52.48	2
scaffold_27196_4038	52.48	2
scaffold_62586_1474	52.48	2
scaffold_51491_1461	52.48	2
scaffold_58633_892	52.96	2
scaffold_13683_4314	52.96	2
scaffold_863_479	52.96	2	g1978.t1	No BLAST Hit
scaffold_863_483	52.96	2	g1978.t1	No BLAST Hit
scaffold_118119_189	52.97	2
SCF158633	52.97	2
scaffold_59431_392	52.97	2
scaffold_5848_6426	52.97	2
scaffold_23767_1467	52.97	2	g22919.t1	XP_004307582 PREDICTED: serine/threonine-protein phosphatase PP1 isozyme 4 [Fragaria vesca subsp. vesca].
scaffold_59431_632	52.97	2
scaffold_59431_1011	52.97	2
scaffold_59431_1023	52.97	2
scaffold_59431_416	52.97	2
scaffold_59431_434	52.97	2
scaffold_59431_516	52.97	2
scaffold_59431_598	52.97	2
scaffold_59431_637	52.97	2
scaffold_59431_643	52.97	2
scaffold_59431_885	52.97	2
scaffold_57248_610	53.33	2
scaffold_13781_5835	53.56	2	g16206.t1	XP_003632484 PREDICTED: uncharacterized protein LOC100233139 [Vitis vinifera].
VCB-C03938_274	53.56	2
scaffold_20030_3302	54.15	2
SCF18709	54.15	2
scaffold_104290_912	54.15	2
scaffold_5394_8263	54.47	2
scaffold_64060_1916	54.47	2
scaffold_18136_2299	54.47	2	g19380.t1	No BLAST Hit
scaffold_145748_217	54.47	2
scaffold_1569_1562	54.47	2	g3162.t1	XP_002534015 suppressor of ty, putative [Ricinus communis].
scaffold_28640_2400	54.47	2
scaffold_6444_4003	54.47	2
35137_K63	54.47	2
SCF3595	54.75	2
scaffold_10365_6125	54.75	2
scaffold_180329_159	54.75	2
scaffold_104579_512	54.75	2
scaffold_104947_324	54.75	2
scaffold_117942_557	54.75	2
scaffold_180329_194	54.75	2
scaffold_180329_200	54.75	2
scaffold_18251_2010	54.75	2	g19459.t1	No BLAST Hit
scaffold_18251_2037	54.75	2	g19459.t1	No BLAST Hit
scaffold_18386_4830	54.75	2
scaffold_34239_1132	54.75	2
scaffold_41261_2113	54.75	2
scaffold_41737_2850	54.75	2	g30582.t1	XP_003632109 PREDICTED: protein disulfide isomerase-like 1-4 isoform 2 [Vitis vinifera].
scaffold_41737_2851	54.75	2	g30582.t1	XP_003632109 PREDICTED: protein disulfide isomerase-like 1-4 isoform 2 [Vitis vinifera].
scaffold_54851_1993	54.75	2	g34007.t1	No BLAST Hit
scaffold_59806_1158	54.75	2
scaffold_66159_612	54.75	2
scaffold_72422_1279	54.75	2
scaffold_72422_1301	54.75	2
scaffold_81822_1249	54.75	2	g38561.t1	No BLAST Hit
scaffold_64091_1003	54.75	2
scaffold_104947_288	54.75	2
SCF66692	54.75	2
SCF192715	54.75	2
SCF174468	54.75	2
172672_K70	54.75	2
scaffold_50678_1265	54.75	2
scaffold_117942_599	54.75	2
297265_K63	54.75	2
scaffold_10520_1898	54.75	2	g13480.t1	XP_004236745 PREDICTED: protein kinase APK1A, chloroplastic [Solanum lycopersicum].
scaffold_42167_2474	54.75	2
scaffold_50678_1286	54.75	2
scaffold_18366_1701	54.75	2	g19522.t1	XP_002276664 PREDICTED: RNA pseudourine synthase 5-like [Vitis vinifera].
SCF56816	54.75	2
scaffold_19158_316	54.75	2	g20053.t1	XP_004239760 PREDICTED: ABC transporter G family member 6 [Solanum lycopersicum].
scaffold_81822_1213	56.25	2	g38561.t1	No BLAST Hit
scaffold_19158_394	56.25	2	g20053.t1	XP_004239760 PREDICTED: ABC transporter G family member 6 [Solanum lycopersicum].
scaffold_90192_957	56.25	2
scaffold_135125_84	56.25	2
scaffold_11312_2927	56.67	2
scaffold_50678_1308	56.67	2
scaffold_50678_1309	56.67	2
scaffold_57144_1671	56.67	2
scaffold_26229_3473	56.67	2
SCF125667	57.45	2
scaffold_10261_6131	57.45	2
scaffold_24126_604	57.59	2
scaffold_34688_1152	57.59	2
scf12916	57.59	2
scaffold_84806_119	57.59	2
scaffold_12898_2079	57.59	2
SCF61078	57.59	2
scaffold_118949_621	57.59	2
scaffold_125738_231	57.67	2
scaffold_6617_6407	58.09	2	g9665.t1	No BLAST Hit
CHI03186-1_124	58.09	2
scaffold_6617_6412	58.16	2	g9665.t1	No BLAST Hit
scaffold_6617_6623	58.78	2	g9665.t1	No BLAST Hit
scaffold_6617_6395	58.78	2	g9665.t1	No BLAST Hit
scaffold_125738_277	58.78	2
scaffold_66792_1570	58.78	2
scaffold_2711_7365	59.23	2	g4891.t1	XP_002267310 PREDICTED: transcriptional activator DEMETER isoform X1 [Vitis vinifera].
scaffold_5311_3026	59.23	2	g8258.t1	No BLAST Hit
scaffold_16548_4022	59.23	2	g18270.t1	No BLAST Hit
scaffold_16541_2946	59.23	2	g18261.t1	No BLAST Hit
scaffold_16541_4957	59.23	2	g18261.t1	No BLAST Hit
scaffold_87539_1023	59.23	2
scaffold_87539_983	59.23	2
scaffold_6814_6237	59.38	2
SCF80703	60.43	2
scaffold_5591_2266	60.43	2
scaffold_6492_1901	60.43	2	g9529.t1	XP_004233874 PREDICTED: F-box/kelch-repeat protein At3g23880-like [Solanum lycopersicum].
scaffold_1236_325	60.43	2	g2612.t1	No BLAST Hit
scaffold_2712_9176	60.57	2	g4892.t1	XP_004250473 PREDICTED: uncharacterized protein LOC101245816 [Solanum lycopersicum].
scaffold_2712_9177	60.57	2	g4892.t1	XP_004250473 PREDICTED: uncharacterized protein LOC101245816 [Solanum lycopersicum].
scaffold_39311_1240	60.57	2
scaffold_1182_9666	61.23	2	g2519.t1	XP_002276781 PREDICTED: scopoletin glucosyltransferase [Vitis vinifera].
scaffold_28071_2527	61.23	2
scaffold_40275_701	61.31	2
scaffold_27004_2941	61.71	2
scaffold_24212_1491	61.74	2	g23173.t1	No BLAST Hit
scaffold_18990_1352	61.74	2
scaffold_18990_1323	61.74	2
scaffold_18990_1386	61.74	2
scaffold_44867_557	61.93	2
scaffold_24230_2764	61.93	2
scaffold_20695_3165	62.07	2
scaffold_131448_245	62.8	2
scaffold_43613_1759	62.8	2
scaffold_209543_49	62.8	2
scaffold_65833_1786	62.86	2
scaffold_209315_135	63.49	2
SCF213102	63.49	2
198358_K70	63.49	2
scaffold_57324_1841	63.78	2
scaffold_57324_1853	63.78	2
scaffold_12249_5762	66.52	2
scaffold_12249_5782	66.52	2
scaffold_3191_5626	67.31	2	g5563.t1	XP_002263129 PREDICTED: aspartic proteinase-like protein 2 isoform X1 [Vitis vinifera].
scaffold_96752_138	70.03	2
scaffold_9808_3404	70.24	2	g12798.t1	XP_002284087 PREDICTED: GDSL esterase/lipase At5g03820-like [Vitis vinifera].
scaffold_16179_4036	70.24	2
scaffold_82728_337	70.24	2
scaffold_7669_6864	70.54	2
scaffold_7669_6869	70.54	2
scaffold_9595_7371	70.54	2	g12596.t1	XP_004246549 PREDICTED: protein BUD31 homolog 2-like isoform 1 [Solanum lycopersicum].
scaffold_116525_279	72.55	2
scaffold_9595_7405	73.48	2	g12596.t1	XP_004246549 PREDICTED: protein BUD31 homolog 2-like isoform 1 [Solanum lycopersicum].
scaffold_122027_478	74.6	2
scaffold_4666_9165	74.6	2	g7473.t1	XP_002276979 PREDICTED: solute carrier family 35 member F1-like [Vitis vinifera].
scaffold_47218_1068	74.7	2
scaffold_24665_3919	74.7	2	g23429.t1	XP_002530339 Desacetoxyvindoline 4-hydroxylase, putative [Ricinus communis].
scaffold_25895_1836	74.7	2	g24059.t1	XP_002281666 PREDICTED: uncharacterized protein LOC100247671 [Vitis vinifera].
scaffold_25952_3980	74.7	2
scaffold_50629_59	74.7	2
scaffold_21661_1873	74.7	2
scaffold_76736_1131	74.7	2
scaffold_5882_6822	74.83	2	g8864.t1	XP_002262850 PREDICTED: uncharacterized protein LOC100248009 isoform X1 [Vitis vinifera].
scaffold_102126_133	74.83	2
scaffold_13401_1927	75	2	g15893.t1	No BLAST Hit
scaffold_59545_1381	75.39	2
scaffold_102126_82	75.39	2
scaffold_59545_1383	75.39	2
scaffold_7400_6952	75.43	2	g10475.t1	XP_002308456 predicted protein, partial [Populus trichocarpa].
scaffold_3671_8042	78.4	2	g6225.t1	XP_003550699 PREDICTED: uncharacterized protein LOC100806232 isoform X1 [Glycine max].
scaffold_58637_256	78.4	2
scaffold_13652_4416	78.4	2	g16103.t1	XP_002280930 PREDICTED: 2-Cys peroxiredoxin [Vitis vinifera].
scaffold_13652_4426	78.4	2	g16103.t1	XP_002280930 PREDICTED: 2-Cys peroxiredoxin [Vitis vinifera].
scaffold_14670_2538	82.19	2	g16870.t1	XP_003631297 PREDICTED: uncharacterized protein LOC100246722 [Vitis vinifera].
scaffold_36380_433	82.4	2
scaffold_3671_8064	82.4	2	g6225.t1	XP_003550699 PREDICTED: uncharacterized protein LOC100806232 isoform X1 [Glycine max].
scaffold_2594_4289	82.4	2	g4723.t1	XP_002322780 predicted protein [Populus trichocarpa].
scaffold_18171_1688	84.19	2	g19411.t1	XP_004164483 PREDICTED: uncharacterized LOC101213573 [Cucumis sativus].
scaffold_52236_472	84.19	2
1trimcontig209220	84.19	2
scaffold_17171_1079	84.39	2	g18708.t1	XP_002267321 PREDICTED: D-lactate dehydrogenase [cytochrome], mitochondrial isoform X1 [Vitis vinifera].
scaffold_17171_1126	84.39	2	g18708.t1	XP_002267321 PREDICTED: D-lactate dehydrogenase [cytochrome], mitochondrial isoform X1 [Vitis vinifera].
scaffold_19406_3253	84.39	2	g20207.t1	No BLAST Hit
scaffold_10729_6216	85.97	2	g13676.t1	XP_004173112 PREDICTED: lysosomal beta glucosidase-like, partial [Cucumis sativus].
scaffold_46488_1151	85.97	2
scaffold_30888_868	85.97	2	g26468.t1	No BLAST Hit
scaffold_66167_373	85.97	2
scaffold_66167_381	85.97	2
SCF142664	85.97	2
contig704	85.98	2
scaffold_5870_3372	86.45	2
scaffold_5870_7369	86.45	2
scaffold_22595_200	87.05	2
scaffold_98632_128	87.05	2
scaffold_22901_1940	87.05	2
scaffold_5870_3281	87.05	2
scaffold_5870_3285	87.05	2
scaffold_25728_1166	87.74	2	g23985.t1	XP_002277066 PREDICTED: histone-lysine N-methyltransferase SUVR3 [Vitis vinifera].
scaffold_35493_3053	87.76	2
vm54133	87.76	2
scaffold_90528_1718	87.96	2
scaffold_41902_945	87.96	2
scaffold_41902_971	87.96	2
scaffold_33471_2525	87.96	2
scaffold_30133_3150	87.96	2
scaffold_35493_3047	88.09	2
scaffold_5870_7288	88.38	2
scaffold_17588_2625	88.38	2	g19013.t1	XP_002277300 PREDICTED: zinc finger CCCH domain-containing protein 67 [Vitis vinifera].
scaffold_17588_2682	88.38	2	g19013.t1	XP_002277300 PREDICTED: zinc finger CCCH domain-containing protein 67 [Vitis vinifera].
scaffold_35493_3144	88.53	2
scaffold_33471_2683	88.53	2
scaffold_35493_2993	88.53	2
scaffold_35493_3014	88.53	2
scaffold_35493_3046	88.53	2
scaffold_35493_3052	88.53	2
SCF122552	88.54	2
SCF203038	88.54	2
scaffold_105613_75	88.54	2
scaffold_871_3737	88.54	2	g1993.t1	XP_002268494 PREDICTED: zinc finger protein VAR3, chloroplastic [Vitis vinifera].
scaffold_53819_448	88.54	2
scaffold_10622_4570	88.54	2	g13574.t1	XP_002308543 conserved oligomeric Golgi complex component-related family protein [Populus trichocarpa].
scaffold_10622_4603	88.54	2	g13574.t1	XP_002308543 conserved oligomeric Golgi complex component-related family protein [Populus trichocarpa].
scaffold_14435_1178	88.54	2	g16704.t1	ESW17488 hypothetical protein PHAVU_007G2436000g, partial [Phaseolus vulgaris].
scaffold_6392_7385	88.54	2	g9428.t1	XP_002283436 PREDICTED: protein kinase and PP2C-like domain-containing protein [Vitis vinifera].
SCF141794	89.43	2
scaffold_1314_11486	90.02	2	g2750.t1	XP_002278329 PREDICTED: 4-alpha-glucanotransferase DPE2 [Vitis vinifera].
VCC_B3	90.92	2
scaffold_17080_3162	91.66	2
scaffold_14846_3505	91.66	2	g17009.t1	XP_004306443 PREDICTED: type I inositol 1,4,5-trisphosphate 5-phosphatase CVP2 isoform X3 [Fragaria vesca subsp. vesca].
scaffold_7191	91.81	2
scaffold_66779_961	91.94	2
scaffold_13330_2138	91.94	2	g15838.t1	XP_002322401 putative pectin methylesterase family protein [Populus trichocarpa].
scaffold_86678_1031	92.8	2
scaffold_23713_3192	93.6	2	g22886.t1	No BLAST Hit
scaffold_17601_2057	93.72	2	g19024.t1	No BLAST Hit
scaffold_3832_8164	93.72	2	g6424.t1	XP_004164014 PREDICTED: haloacid dehalogenase-like hydrolase domain-containing protein 3-like [Cucumis sativus].
scaffold_17601_2011	93.72	2	g19024.t1	No BLAST Hit
scaffold_17601_1989	93.72	2	g19024.t1	No BLAST Hit
scaffold_17601_2029	93.72	2	g19024.t1	No BLAST Hit
scaffold_17601_2096	93.72	2	g19024.t1	No BLAST Hit
scaffold_17601_2102	93.72	2	g19024.t1	No BLAST Hit
scaffold_3832_8162	93.72	2	g6424.t1	XP_004164014 PREDICTED: haloacid dehalogenase-like hydrolase domain-containing protein 3-like [Cucumis sativus].
scaffold_51997_1424	93.72	2
scaffold_51997_1509	93.72	2
SCF177451	94.19	2
scaffold_5421_2388	96.9	2	g8376.t1	XP_002529505 conserved hypothetical protein [Ricinus communis].
scaffold_5421_2473	96.9	2	g8376.t1	XP_002529505 conserved hypothetical protein [Ricinus communis].
SCF175823	97.18	2
scaffold_8645_1830	99.56	2	g11686.t1	XP_002526720 conserved hypothetical protein [Ricinus communis].
1trimcontig332949	99.56	2
scaffold_245_5211	99.56	2	g720.t1	XP_002277512 PREDICTED: carboxyl-terminal-processing peptidase 3, chloroplastic [Vitis vinifera].
scaffold_245_5315	99.56	2	g720.t1	XP_002277512 PREDICTED: carboxyl-terminal-processing peptidase 3, chloroplastic [Vitis vinifera].
scaffold_245_5345	99.56	2	g720.t1	XP_002277512 PREDICTED: carboxyl-terminal-processing peptidase 3, chloroplastic [Vitis vinifera].
scaffold_29231_3083	99.56	2
ct118602	99.56	2
Ig15420a	99.56	2
scaffold_29231_3092	99.56	2
scaffold_56127_856	99.56	2
scaffold_30834_339	99.56	2
vm13780	100.75	2
scaffold_56127_912	100.75	2
scaffold_8410_3911	100.75	2	g11462.t1	XP_003635633 PREDICTED: LOW QUALITY PROTEIN: myrcene synthase, chloroplastic-like, partial [Vitis vinifera].
scaffold_85751_70	100.75	2
scaffold_32633_1467	100.75	2
scaffold_28740_664	0	3
scaffold_59355_1495	1.16	3
contig130Fb	1.16	3
scaffold_120985_668	1.16	3
scaffold_60563_2063	1.16	3
scaffold_55518_2216	1.16	3
scaffold_60563_2064	1.16	3
vm78806	1.16	3
scaffold_7798_8014	1.43	3	g10856.t1	XP_002267256 PREDICTED: RRP12-like protein-like [Vitis vinifera].
scaffold_12181_4577	1.43	3	g14896.t1	XP_002267256 PREDICTED: RRP12-like protein-like [Vitis vinifera].
scaffold_18448_2692	1.43	3	g19584.t1	XP_002277706 PREDICTED: transmembrane protein 184C isoform X1 [Vitis vinifera].
scaffold_7798_8021	1.43	3	g10856.t1	XP_002267256 PREDICTED: RRP12-like protein-like [Vitis vinifera].
scaffold_7798_8043	1.43	3	g10856.t1	XP_002267256 PREDICTED: RRP12-like protein-like [Vitis vinifera].
scaffold_5310_4095	4.56	3	g8257.t1	XP_002263244 PREDICTED: uncharacterized protein LOC100265216 [Vitis vinifera].
scaffold_134_11665	4.56	3	g451.t1	XP_002458046 hypothetical protein SORBIDRAFT_03g026110 [Sorghum bicolor].
scf511	4.56	3
scaffold_134_17416	4.56	3	g451.t1	XP_002458046 hypothetical protein SORBIDRAFT_03g026110 [Sorghum bicolor].
scaffold_134_17423	4.56	3	g451.t1	XP_002458046 hypothetical protein SORBIDRAFT_03g026110 [Sorghum bicolor].
scaffold_27062_1058	4.56	3
scaffold_57845_967	4.56	3
scaffold_39193_792	4.56	3
scaffold_1405_3342	4.56	3	g2892.t1	XP_002454503 hypothetical protein SORBIDRAFT_04g032300 [Sorghum bicolor].
scaffold_48644_1138	4.56	3
scaffold_36630_1455	4.56	3
scaffold_36630_1457	4.56	3
scaffold_17610_5409	4.65	3	g19031.t1	No BLAST Hit
scaffold_36630_1470	4.73	3
SCF90229	5.33	3
scaffold_83985_935	5.33	3
scaffold_83985_952	5.33	3
scaffold_10802_5013	5.41	3	g13737.t1	XP_003633112 PREDICTED: U-box domain-containing protein 34-like [Vitis vinifera].
vm04084	6.52	3
scaffold_27082_1216	6.52	3	g24666.t1	XP_004169558 PREDICTED: uncharacterized protein LOC101226847 [Cucumis sativus].
scaffold_15946_5410	6.52	3
scaffold_121138_141	6.52	3
scaffold_77824_1049	6.52	3
scf20g	6.52	3
scaffold_2818_7348	6.52	3
scaffold_2818_7317	6.52	3
scaffold_2818_7369	6.52	3
scaffold_2818_7377	6.52	3
vm51409	6.52	3
2ms2a02	6.52	3
scaffold_4840_3606	7.03	3
scaffold_93522_327	7.11	3
scaffold_44864_476	7.11	3
scaffold_44864_517	7.11	3
scaffold_21415_4864	7.11	3	g21518.t1	No BLAST Hit
scaffold_44864_413	7.11	3
scaffold_3809_1860	8.22	3
scaffold_93522_243	8.22	3
scaffold_93522_258	8.22	3
SCF27755	8.22	3
scaffold_76462_893	8.22	3
scaffold_62655_1406	8.22	3	g35674.t1	No BLAST Hit
scaffold_62655_1463	8.22	3	g35674.t1	No BLAST Hit
scaffold_99457_319	8.22	3
scaffold_99457_312	8.22	3
scaffold_85554_1128	8.22	3
scaffold_85554_1130	8.22	3
scaffold_5578_7960	8.22	3	g8546.t1	XP_002530188 conserved hypothetical protein [Ricinus communis].
scaffold_64939_1550	8.22	3
SCF23339	8.22	3
scaffold_64939_1541	8.22	3
scaffold_64939_1552	8.22	3
scaffold_76056_884	8.22	3
scaffold_10968_5523	8.22	3	g13895.t1	XP_002282312 PREDICTED: rop guanine nucleotide exchange factor 1 [Vitis vinifera].
scaffold_10968_5525	8.22	3	g13895.t1	XP_002282312 PREDICTED: rop guanine nucleotide exchange factor 1 [Vitis vinifera].
scaffold_10968_5533	8.22	3	g13895.t1	XP_002282312 PREDICTED: rop guanine nucleotide exchange factor 1 [Vitis vinifera].
scaffold_121138_142	8.22	3
scaffold_1220_2682	8.22	3	g2587.t1	XP_002281749 PREDICTED: uncharacterized protein LOC100252108 [Vitis vinifera].
scaffold_128832_298	8.22	3
scaffold_20068_3771	8.22	3	g20655.t1	XP_004161104 PREDICTED: LOW QUALITY PROTEIN: protein bem46-like [Cucumis sativus].
scaffold_21275_743	8.22	3
scaffold_33807_2762	8.22	3
scaffold_33807_2769	8.22	3
scaffold_33807_2793	8.22	3
scaffold_3572_387	8.22	3	g6083.t1	XP_002277600 PREDICTED: DEAD-box ATP-dependent RNA helicase 17 isoform X1 [Vitis vinifera].
scaffold_45860_1327	8.22	3
scaffold_45860_1333	8.22	3
scaffold_92827_539	8.22	3
scaffold_93693_319	8.22	3
scaffold_99562_874	8.22	3
scaffold_69755_831	8.82	3
scaffold_69546_1416	8.82	3
scaffold_45381_868	8.82	3
scaffold_45381_872	8.82	3
scaffold_128832_245	8.82	3
scaffold_37044_2156	8.82	3	g28957.t1	ACB30546 putative lysophosphatidic acid acyltransferase [Ricinus communis].
scaffold_31973_630	8.82	3	g26935.t1	XP_004290080 PREDICTED: CMP-sialic acid transporter 4 [Fragaria vesca subsp. vesca].
scaffold_31973_619	8.82	3	g26935.t1	XP_004290080 PREDICTED: CMP-sialic acid transporter 4 [Fragaria vesca subsp. vesca].
scaffold_31973_631	8.82	3	g26935.t1	XP_004290080 PREDICTED: CMP-sialic acid transporter 4 [Fragaria vesca subsp. vesca].
scaffold_69755_817	10.77	3
scaffold_32118_826	10.77	3
SCF47809	10.77	3
scaffold_8209_2932	11.2	3	g11273.t1	XP_002269385 PREDICTED: tubulin-folding cofactor C-like [Vitis vinifera].
scaffold_8209_2945	11.2	3	g11273.t1	XP_002269385 PREDICTED: tubulin-folding cofactor C-like [Vitis vinifera].
scaffold_8873_4025	11.2	3	g11912.t1	XP_002282994 PREDICTED: calcium-dependent protein kinase 26 isoform X2 [Vitis vinifera].
scaffold_303_14812	11.2	3	g860.t1	XP_004231109 PREDICTED: brefeldin A-inhibited guanine nucleotide-exchange protein 1 [Solanum lycopersicum].
scaffold_303_14773	11.2	3	g860.t1	XP_004231109 PREDICTED: brefeldin A-inhibited guanine nucleotide-exchange protein 1 [Solanum lycopersicum].
scaffold_1220_9016	14.32	3	g2587.t1	XP_002281749 PREDICTED: uncharacterized protein LOC100252108 [Vitis vinifera].
scaffold_484_15337	14.32	3	g1236.t1	XP_002281652 PREDICTED: uncharacterized protein LOC100255496 [Vitis vinifera].
scaffold_484_15382	14.32	3	g1236.t1	XP_002281652 PREDICTED: uncharacterized protein LOC100255496 [Vitis vinifera].
scaffold_484_15461	14.32	3	g1236.t1	XP_002281652 PREDICTED: uncharacterized protein LOC100255496 [Vitis vinifera].
scaffold_484_15473	14.32	3	g1236.t1	XP_002281652 PREDICTED: uncharacterized protein LOC100255496 [Vitis vinifera].
scaffold_484_15474	14.32	3	g1236.t1	XP_002281652 PREDICTED: uncharacterized protein LOC100255496 [Vitis vinifera].
scaffold_805_1077	16.32	3	g1876.t1	XP_003631541 PREDICTED: uncharacterized protein LOC100246973 [Vitis vinifera].
scaffold_14206_4603	16.32	3	g16544.t1	No BLAST Hit
scaffold_95560_861	16.32	3
scaffold_36168_1897	16.32	3	g28602.t1	XP_002517307 conserved hypothetical protein [Ricinus communis].
scaffold_55209_1202	16.32	3
scaffold_55209_1311	16.32	3
scaffold_55209_1342	16.32	3
scaffold_14505_5942	17.03	3	g16754.t1	XP_004231055 PREDICTED: uncharacterized protein LOC101244815 [Solanum lycopersicum].
SCF98686	17.2	3
42710_K70	17.52	3
411475_K63	17.52	3
scaffold_54603_1691	17.71	3	g33950.t1	XP_003631574 PREDICTED: proline-rich protein 4-like [Vitis vinifera].
scaffold_54603_1721	17.71	3	g33950.t1	XP_003631574 PREDICTED: proline-rich protein 4-like [Vitis vinifera].
scaffold_21244_1604	17.71	3
scaffold_14619_5062	17.71	3
scaffold_22746_3852	17.71	3
scaffold_39156_1356	17.71	3
1trimcontig440008	17.71	3
scaffold_37953_2229	17.76	3
scaffold_120368_140	18.3	3
scaffold_37953_2374	18.3	3
scaffold_40272_1259	18.3	3
scaffold_37953_2377	18.3	3
SCF57479	19.56	3
scaffold_38329_2902	20.14	3
scaffold_8610_6310	20.14	3
scaffold_8610_6211	20.75	3
scaffold_120368_107	20.75	3
scaffold_132857_319	20.75	3
scaffold_20179_4053	20.75	3
scaffold_120110_223	20.75	3
scaffold_163736_100	20.75	3
scaffold_19700_1833	21.49	3	g20420.t1	XP_003603980 Inositol-1-monophosphatase [Medicago truncatula].
scaffold_6379_4467	22.98	3	g9416.t1	XP_002883153 hypothetical protein ARALYDRAFT_898258 [Arabidopsis lyrata subsp. lyrata].
scaffold_6379_4462	22.98	3	g9416.t1	XP_002883153 hypothetical protein ARALYDRAFT_898258 [Arabidopsis lyrata subsp. lyrata].
scaffold_84794_1177	22.98	3
scaffold_6379_4634	23.55	3	g9416.t1	XP_002883153 hypothetical protein ARALYDRAFT_898258 [Arabidopsis lyrata subsp. lyrata].
scaffold_6379_4585	23.55	3	g9416.t1	XP_002883153 hypothetical protein ARALYDRAFT_898258 [Arabidopsis lyrata subsp. lyrata].
121633_K63	23.59	3
scaffold_30651_1550	24.55	3
scaffold_103107_262	25.5	3
scaffold_53375_1865	25.5	3	g33707.t1	No BLAST Hit
scaffold_40211_776	25.97	3
scaffold_26875_2437	25.97	3
scaffold_3332_2249	25.97	3	g5759.t1	No BLAST Hit
scaffold_26875_2440	25.97	3
scaffold_23031_1288	25.97	3
scaffold_31290_2119	25.97	3
scaffold_31290_2139	25.97	3
scaffold_49616_2230	25.97	3
scaffold_5919_4165	25.97	3	g8897.t1	XP_002284912 PREDICTED: uncharacterized protein LOC100250124 [Vitis vinifera].
SCF38340	25.97	3
scaffold_51167_1574	25.97	3
scaffold_51167_1566	25.97	3
scaffold_24357_1562	25.97	3
scaffold_81716_1205	25.97	3
scaffold_81716_1211	25.97	3
scaffold_54785_1107	26.26	3	g33983.t1	XP_002284858 PREDICTED: expansin-A1 [Vitis vinifera].
scaffold_30061_2463	26.26	3	g26078.t1	XP_004235992 PREDICTED: cyclic dof factor 1-like [Solanum lycopersicum].
scaffold_30061_2502	26.26	3	g26078.t1	XP_004235992 PREDICTED: cyclic dof factor 1-like [Solanum lycopersicum].
scaffold_3812_6378	26.57	3
scaffold_3812_6384	26.57	3
scaffold_23031_2145	26.57	3
scaffold_46112_2395	26.57	3
scaffold_15208_4395	26.57	3
1trimcontig439466	26.57	3
SCF9815	26.57	3
scaffold_108520_514	26.57	3
scaffold_2565_10935	26.57	3	g4679.t1	No BLAST Hit
scaffold_73187_404	26.57	3
scaffold_13388_3745	28.64	3
SCF110888	28.64	3
scaffold_49616_2260	28.64	3
scaffold_42014_1292	29.67	3
scaffold_21160_2395	29.67	3
scaffold_36500_3209	30.23	3	g28732.t1	XP_002448503 hypothetical protein SORBIDRAFT_06g028070 [Sorghum bicolor].
scaffold_24160_2138	30.23	3	g23140.t1	XP_004235987 PREDICTED: ATP synthase subunit gamma, mitochondrial [Solanum lycopersicum].
scaffold_18210_2781	30.23	3
scaffold_42014_1307	30.23	3
scaffold_57070_1345	30.23	3
scaffold_18210_2626	30.23	3
scaffold_18210_2746	30.23	3
scaffold_81500_1424	30.23	3	g38529.t1	No BLAST Hit
scaffold_37951	30.23	3
scaffold_1478_9928	30.23	3	g3008.t1	XP_004299107 PREDICTED: polyol transporter 5-like [Fragaria vesca subsp. vesca].
scaffold_44298_2166	30.23	3
scaffold_90420_584	30.26	3
scaffold_104859_376	32.35	3
scaffold_58370_1534	32.77	3
scaffold_90420_530	32.77	3
scaffold_90420_542	32.77	3
scaffold_90420_549	32.77	3
scaffold_90420_626	32.77	3
scaffold_88664_663	33.36	3
scaffold_13562_2793	33.36	3	g16023.t1	No BLAST Hit
scaffold_5595_5982	33.36	3
scaffold_61575_203	33.36	3
scaffold_70042_940	33.36	3
scaffold_70042_968	33.36	3
82171_K70	33.36	3
scaffold_15548_1005	33.36	3
scaffold_113156_448	34.75	3
SCF21119	34.75	3
scaffold_2087_7048	34.78	3	g3993.t1	XP_002521225 conserved hypothetical protein [Ricinus communis].
scaffold_29047_2048	34.78	3	g25615.t1	XP_003630872 hypothetical protein MTR_8g104400 [Medicago truncatula].
scaffold_47624_1052	34.78	3
scaffold_29047_2076	34.78	3	g25615.t1	XP_003630872 hypothetical protein MTR_8g104400 [Medicago truncatula].
scaffold_82560_1006	34.78	3
scaffold_82560_1018	34.78	3
scaffold_82560_930	34.78	3
scaffold_82560_931	34.78	3
scaffold_82560_970	34.78	3
scaffold_10160_6524	35.06	3	g13156.t1	No BLAST Hit
scaffold_89673_809	35.34	3
scaffold_20907_3773	35.34	3	g21193.t1	XP_002326678 predicted protein [Populus trichocarpa].
scaffold_13882_622	35.34	3
scaffold_13882_772	35.34	3
scaffold_13882_803	35.34	3
scaffold_30577_3814	35.34	3	g26327.t1	XP_002283095 PREDICTED: dihydropyrimidine dehydrogenase [NADP(+)] [Vitis vinifera].
scaffold_70071_808	35.34	3
scaffold_59598_424	35.34	3
scaffold_5850_3387	35.34	3
scaffold_1733_151	35.34	3	g3439.t1	No BLAST Hit
scaffold_1733_156	35.34	3	g3439.t1	No BLAST Hit
scaffold_83752_1086	35.34	3
scaffold_52106_445	35.34	3
scaffold_83752_1040	35.34	3
scaffold_32248_1991	35.34	3
scaffold_85748_525	35.34	3
scaffold_27672_3597	35.34	3
scaffold_37792_1500	35.34	3	g29226.t1	No BLAST Hit
scaffold_46451_1146	35.34	3
scaffold_56734_1093	35.34	3
scaffold_56734_1132	35.34	3
scaffold_85748_479	35.34	3
scaffold_94531_926	35.34	3
scaffold_94531_929	35.34	3
scaffold_94531_943	35.34	3
1trimcontig436904	35.34	3
scaffold_108730_32	35.34	3
scaffold_5795_673	35.34	3	g8774.t1	No BLAST Hit
SCF108252	35.34	3
SCF128992	35.34	3
KAN-11440_291	35.34	3
SCF78184	35.34	3
scaffold_127523_575	35.34	3
scaffold_42119_2582	35.34	3
scaffold_1733_59	35.34	3	g3439.t1	No BLAST Hit
scaffold_15346_2911	35.34	3
scaffold_35026_462	35.34	3
scaffold_15346_2917	35.34	3
scaffold_23737_3834	35.34	3	g22900.t1	No BLAST Hit
scaffold_42096_2213	35.34	3
scaffold_87905_1015	35.34	3
scaffold_92611_523	35.34	3
scaffold_98035_705	35.34	3
scaffold_98035_706	35.34	3
scaffold_214465_44	35.34	3
scaffold_214465_62	35.34	3
SCF22477	35.34	3
SCF53750	35.34	3
scaffold_35026_341	35.34	3
scaffold_4302_2816	35.34	3	g7025.t1	No BLAST Hit
scaffold_35026_366	35.34	3
scaffold_53046_292	35.34	3
scaffold_6553_5779	35.94	3	g9599.t1	No BLAST Hit
scaffold_6553_5632	36.19	3	g9599.t1	No BLAST Hit
scaffold_12185_2899	36.19	3	g14900.t1	XP_002268900 PREDICTED: uncharacterized protein LOC100250656 [Vitis vinifera].
scaffold_38978_2057	36.19	3
scaffold_129960_534	36.19	3
scaffold_6553_5803	36.19	3	g9599.t1	No BLAST Hit
scaffold_57453_1060	36.19	3
scaffold_3243_9538	36.49	3
scaffold_106895_552	36.49	3
scaffold_106895_571	36.49	3
scf9025	36.53	3
scaffold_158866_55	37.13	3
scaffold_3243_9598	37.13	3
scaffold_3243_9609	38.1	3
SCF7845	38.92	3
scaffold_55507_341	38.92	3
scaffold_10536_5013	38.95	3	g13494.t1	XP_004232391 PREDICTED: transcription initiation factor IIB [Solanum lycopersicum].
scaffold_14492_5182	38.95	3	g16747.t1	XP_003631662 PREDICTED: uncharacterized protein LOC100853783 [Vitis vinifera].
scaffold_14492_5220	38.95	3	g16747.t1	XP_003631662 PREDICTED: uncharacterized protein LOC100853783 [Vitis vinifera].
scaffold_18760_4623	39.27	3	g19791.t1	XP_003615217 hypothetical protein MTR_5g065250 [Medicago truncatula].
scaffold_32778_1212	39.27	3
scaffold_31578_1129	39.27	3	g26774.t1	XP_002331389 predicted protein [Populus trichocarpa].
scaffold_32778_1122	39.27	3
scaffold_3465_5158	39.27	3	g5933.t1	XP_002277528 PREDICTED: far upstream element-binding protein 1 isoform X2 [Vitis vinifera].
scaffold_10536_5015	39.51	3	g13494.t1	XP_004232391 PREDICTED: transcription initiation factor IIB [Solanum lycopersicum].
scaffold_24569_3552	39.51	3
scaffold_24569_3565	39.51	3
scaffold_24569_3574	39.51	3
scaffold_61162_731	40.48	3
scaffold_8287_2876	40.48	3
scaffold_8287_2891	40.48	3
scaffold_27872_1456	41.08	3
scaffold_43967_1194	42.86	3
scaffold_42742_163	42.86	3
scaffold_43967_1225	42.86	3
scaffold_43967_1244	42.86	3
scaffold_43967_1301	42.86	3
scaffold_61162_718	42.86	3
scaffold_5558_3852	42.86	3
scaffold_120300_136	42.86	3
scaffold_5558_3946	42.86	3
scaffold_5558_3889	42.86	3
scaffold_40993_3056	43.05	3
scaffold_18271_1049	43.05	3	g19471.t1	XP_004298879 PREDICTED: uncharacterized protein LOC101307011 [Fragaria vesca subsp. vesca].
scaffold_18271_1059	43.05	3	g19471.t1	XP_004298879 PREDICTED: uncharacterized protein LOC101307011 [Fragaria vesca subsp. vesca].
scaffold_46400_1023	43.05	3
scaffold_18271_1034	43.3	3	g19471.t1	XP_004298879 PREDICTED: uncharacterized protein LOC101307011 [Fragaria vesca subsp. vesca].
scaffold_64332_1557	43.3	3
scaffold_9368_5923	43.3	3
scaffold_12440_4793	45.51	3	g15099.t1	XP_003524582 PREDICTED: peptidyl-prolyl cis-trans isomerase CYP40-like isoform X1 [Glycine max].
scaffold_200430_94	47	3
scaffold_27566_82	47	3	g24909.t1	No BLAST Hit
scaffold_27566_111	47	3	g24909.t1	No BLAST Hit
scaffold_8068_4184	47	3
scaffold_8068_4160	47	3
scaffold_115971_74	47	3
scaffold_12440_4869	47	3	g15099.t1	XP_003524582 PREDICTED: peptidyl-prolyl cis-trans isomerase CYP40-like isoform X1 [Glycine max].
scaffold_19176_176	47	3	g20061.t1	XP_003632513 PREDICTED: uncharacterized protein LOC100854101 [Vitis vinifera].
scaffold_49385_369	47	3
scaffold_49385_464	47	3
scaffold_8068_4135	47	3
scaffold_8068_4197	47	3
scaffold_8068_4262	47	3
scaffold_55109_963	47	3
scaffold_55109_918	47	3
scaffold_5969_6481	47	3	g8951.t1	XP_002283249 PREDICTED: probable beta-1,4-xylosyltransferase IRX14H [Vitis vinifera].
scaffold_20817_2608	47	3
scaffold_55109_909	47	3
scaffold_31278_1677	47	3	g26641.t1	XP_004290309 PREDICTED: peptidyl-prolyl cis-trans isomerase CYP40 [Fragaria vesca subsp. vesca].
scaffold_119452_488	50.64	3
scaffold_119452_519	50.64	3
scaffold_120835_579	50.64	3
scaffold_11842_6734	50.64	3	g14611.t1	XP_002277575 PREDICTED: uncharacterized protein LOC100266406 [Vitis vinifera].
scaffold_46587_1825	50.64	3
scaffold_46587_1839	50.64	3
scaffold_14059_5352	52.94	3
scaffold_35616_2275	52.94	3
scaffold_35616_2302	52.94	3
scaffold_17219_2740	54.12	3	g18740.t1	XP_002272930 PREDICTED: pentatricopeptide repeat-containing protein At1g77360, mitochondrial-like [Vitis vinifera].
scaffold_889_6975	54.12	3	g2020.t1	XP_002279502 PREDICTED: uncharacterized protein LOC100257838 [Vitis vinifera].
scaffold_178384_67	54.12	3
scaffold_889_7003	54.12	3	g2020.t1	XP_002279502 PREDICTED: uncharacterized protein LOC100257838 [Vitis vinifera].
scaffold_52119_1893	54.23	3
scaffold_73112_1219	54.23	3
scaffold_35753_1600	54.23	3	g28459.t1	XP_002270626 PREDICTED: methionyl-tRNA formyltransferase-like [Vitis vinifera].
SCF149145	54.52	3
scaffold_45226_771	54.52	3
scaffold_52119_1866	54.52	3
scaffold_80957_1393	54.52	3
scf5304	56.18	3
scaffold_42994_1177	58.58	3
scaffold_43804_404	58.58	3	g31237.t1	XP_002280530 PREDICTED: uncharacterized protein LOC100256597 [Vitis vinifera].
SCF85773	58.58	3
scaffold_26817_3858	60.96	3
scf142e	60.96	3
scaffold_267_5809	60.96	3	g783.t1	XP_002533540 SP1L, putative [Ricinus communis].
scaffold_72821_1430	60.96	3
scaffold_10155_3218	60.96	3	g13148.t1	XP_002280247 PREDICTED: eukaryotic translation initiation factor 3 subunit M [Vitis vinifera].
scf10688	60.96	3
scaffold_13275	60.96	3
scaffold_31246	60.96	3
scaffold_880_2215	60.96	3	g2008.t1	No BLAST Hit
scaffold_97874_316	60.96	3
scaffold_880_2250	60.96	3	g2008.t1	No BLAST Hit
scaffold_880_2265	60.96	3	g2008.t1	No BLAST Hit
scaffold_2484_5966	60.96	3	g4564.t1	XP_004304165 PREDICTED: EVI5-like protein [Fragaria vesca subsp. vesca].
scaffold_172106_80	60.96	3
scaffold_3164_3789	60.96	3
scaffold_20885_4545	62.22	3
scaffold_743_1726	62.22	3	g1762.t1	XP_003633858 PREDICTED: uncharacterized protein LOC100262792 [Vitis vinifera].
scaffold_13482_2452	62.75	3
scaffold_1637_7350	62.75	3	g3283.t1	XP_002277734 PREDICTED: uncharacterized protein At5g39865-like isoform 1 [Vitis vinifera].
scaffold_1637_7446	62.75	3	g3283.t1	XP_002277734 PREDICTED: uncharacterized protein At5g39865-like isoform 1 [Vitis vinifera].
scaffold_41055_2500	62.75	3
SCF177450	62.75	3
ct155339	62.75	3
scaffold_9359_4141	63.52	3	g12370.t1	XP_004304235 PREDICTED: F-box protein At5g39250-like isoform 3 [Fragaria vesca subsp. vesca].
scaffold_18038_5368	66.32	3	g19312.t1	XP_002283325 PREDICTED: NAP1-related protein 2 [Vitis vinifera].
scaffold_76369_1171	66.64	3
scaffold_28523_940	68.07	3
scaffold_12949_2622	68.07	3
scaffold_15063_5952	68.07	3	g17154.t1	XP_002267044 PREDICTED: 60S ribosomal protein L6, mitochondrial [Vitis vinifera].
scaffold_15063_5953	68.07	3	g17154.t1	XP_002267044 PREDICTED: 60S ribosomal protein L6, mitochondrial [Vitis vinifera].
scaffold_15063_5954	68.07	3	g17154.t1	XP_002267044 PREDICTED: 60S ribosomal protein L6, mitochondrial [Vitis vinifera].
scaffold_41055_2501	68.07	3
313711_K70	68.63	3
scaffold_10070_6536	68.63	3	g13054.t1	XP_002274411 PREDICTED: cyclin-dependent protein kinase inhibitor SMR3 [Vitis vinifera].
scaffold_41055_2497	68.63	3
scaffold_41493_2983	69.87	3
scaffold_7771_2057	69.87	3	g10828.t1	XP_002524651 cinnamoyl-CoA reductase, putative [Ricinus communis].
scaffold_103556_120	70.34	3
scaffold_100329_160	70.34	3
scaffold_103556_142	70.34	3
scaffold_87414_956	70.34	3
ct89711	70.52	3
scaffold_8265_2161	70.52	3
SCF157992	70.52	3
scaffold_1680_2319	70.53	3	g3351.t1	XP_004231834 PREDICTED: surfeit locus protein 2 [Solanum lycopersicum].
scaffold_52491_1681	70.53	3	g33530.t1	XP_003633806 PREDICTED: uncharacterized protein LOC100250716 isoform X2 [Vitis vinifera].
scaffold_9455_7256	70.53	3
scaffold_52491_1708	70.53	3	g33530.t1	XP_003633806 PREDICTED: uncharacterized protein LOC100250716 isoform X2 [Vitis vinifera].
scaffold_52426_2305	71.36	3
scaffold_25717_3244	71.36	3	g23979.t1	XP_004309164 PREDICTED: uncharacterized protein LOC101300012 [Fragaria vesca subsp. vesca].
scaffold_13372_3087	72.9	3	g15874.t1	XP_004245484 PREDICTED: protein NLP7 isoform X1 [Solanum lycopersicum].
scaffold_1499_11576	74.7	3	g3046.t1	No BLAST Hit
scaffold_57793_951	74.7	3	g34664.t1	XP_002301756 predicted protein, partial [Populus trichocarpa].
scaffold_19017	74.7	3
SCF153094	74.7	3
scaffold_203_8320	74.7	3	g624.t1	XP_002313010 hypothetical protein POPTR_0009s12680g [Populus trichocarpa].
scaffold_80063_354	75.46	3
scaffold_903_507	75.46	3	g2042.t1	XP_002275325 PREDICTED: mitochondrial phosphate carrier protein 3, mitochondrial isoform X1 [Vitis vinifera].
scaffold_178690_27	75.46	3
scaffold_28308_2499	75.46	3	g25268.t1	XP_002512895 conserved hypothetical protein [Ricinus communis].
scaffold_22114_4204	76.89	3	g21946.t1	XP_003544390 PREDICTED: thaumatin-like protein 1-like [Glycine max].
scaffold_44_6824	80.01	3	g184.t1	XP_002278162 PREDICTED: proteasome subunit alpha type-7 [Vitis vinifera].
scaffold_44_6839	80.01	3	g184.t1	XP_002278162 PREDICTED: proteasome subunit alpha type-7 [Vitis vinifera].
contig480Fb	82.61	3
scaffold_83331_243	82.87	3
1trimcontig443603	83.66	3
scaffold_15806_2166	85.17	3	g17727.t1	XP_002267333 PREDICTED: NAC domain-containing protein 86 [Vitis vinifera].
SCF162565	85.17	3
scaffold_194092_103	85.17	3
scaffold_8555_7284	85.17	3	g11586.t1	XP_002532876 2-deoxyglucose-6-phosphate phosphatase, putative [Ricinus communis].
scaffold_8555_7312	85.17	3	g11586.t1	XP_002532876 2-deoxyglucose-6-phosphate phosphatase, putative [Ricinus communis].
scaffold_4882_5968	85.84	3	g7727.t1	No BLAST Hit
scaffold_1311_1453	85.84	3	g2744.t1	No BLAST Hit
scaffold_1311_1468	85.84	3	g2744.t1	No BLAST Hit
scaffold_15806_2140	85.84	3	g17727.t1	XP_002267333 PREDICTED: NAC domain-containing protein 86 [Vitis vinifera].
scaffold_69649_782	85.84	3	g36855.t1	No BLAST Hit
scaffold_3330_4772	85.84	3	g5757.t1	No BLAST Hit
scaffold_69649_790	85.84	3	g36855.t1	No BLAST Hit
scaffold_60765_2081	87.55	3
scaffold_13541_2643	87.55	3	g16005.t1	XP_004302218 PREDICTED: uncharacterized aarF domain-containing protein kinase At4g31390, chloroplastic [Fragaria vesca subsp. vesca].
NA172	87.55	3
scaffold_2692_1979	87.55	3	g4864.t1	XP_002527104 protein with unknown function [Ricinus communis].
scaffold_13541_2650	87.55	3	g16005.t1	XP_004302218 PREDICTED: uncharacterized aarF domain-containing protein kinase At4g31390, chloroplastic [Fragaria vesca subsp. vesca].
scaffold_35862	87.55	3
scaffold_199587_181	87.79	3
scaffold_199587_137	87.79	3
scaffold_199587_157	87.79	3
scaffold_199587_158	87.79	3
scaffold_199587_182	87.79	3
scaffold_3520_10124	88.15	3	g6011.t1	No BLAST Hit
scaffold_3287_3468	88.15	3	g5692.t1	XP_002276081 PREDICTED: uncharacterized protein LOC100264638 isoform X1 [Vitis vinifera].
SCF58861	88.74	3
scaffold_95650_374	91.12	3
scaffold_12659_2033	91.12	3
scaffold_12659_2051	91.12	3
SCF27510	92.4	3
scaffold_58947_238	92.4	3
SCF56561	0	4
418294_K63	0	4
scaffold_4605_6097	0	4	g7399.t1	XP_003546119 PREDICTED: F-box/kelch-repeat protein At3g23880-like isoform X1 [Glycine max].
scaffold_47329_1182	0	4
scaffold_2079_1738	0.59	4	g3981.t1	XP_004296789 PREDICTED: sodium/hydrogen exchanger 2-like [Fragaria vesca subsp. vesca].
scaffold_68330_223	0.59	4
1trimcontig176303	0.59	4
SCF26697	0.59	4
scaffold_40808_2829	1.19	4
scaffold_71525_1564	1.19	4
scaffold_87360_1156	1.19	4
scaffold_66266_726	1.19	4
2ms4d10b	1.19	4
ct119523	1.19	4
ct94504	1.19	4
GVC-V24d10b_202	1.19	4
scaffold_5428_1979	1.19	4	g8385.t1	XP_002282293 PREDICTED: uncharacterized protein LOC100242666 [Vitis vinifera].
scaffold_10709_5238	1.19	4
scaffold_1231_11640	1.19	4	g2605.t1	XP_002281606 PREDICTED: chloride channel protein CLC-d [Vitis vinifera].
scaffold_88382_740	1.19	4
scaffold_88382_749	1.19	4
scaffold_13942_3967	1.34	4
scaffold_172290_53	1.34	4
scaffold_46954_428	1.34	4
scaffold_466_11599	1.34	4	g1207.t1	XP_002282135 PREDICTED: uncharacterized protein LOC100261301 [Vitis vinifera].
scaffold_19545_3755	1.34	4	g20305.t1	XP_002282622 PREDICTED: pentatricopeptide repeat-containing protein At4g14850 [Vitis vinifera].
scaffold_9495_6545	1.34	4
scaffold_10450_6831	1.34	4	g13417.t1	XP_004307055 PREDICTED: uncharacterized protein At4g14342 [Fragaria vesca subsp. vesca].
scaffold_10450_6833	1.34	4	g13417.t1	XP_004307055 PREDICTED: uncharacterized protein At4g14342 [Fragaria vesca subsp. vesca].
scaffold_217165_17	1.34	4
scaffold_24467_132	1.34	4
scaffold_65696_1602	1.34	4
scaffold_65696_1625	1.34	4
SCF83036	1.34	4
scaffold_9495_6618	2.39	4
scaffold_66687_192	2.39	4
scaffold_70108_831	2.39	4
scaffold_466_2095	2.39	4	g1207.t1	XP_002282135 PREDICTED: uncharacterized protein LOC100261301 [Vitis vinifera].
scaffold_16354_3940	2.39	4
scaffold_49548_2207	2.39	4
scaffold_6214_5063	2.39	4	g9211.t1	XP_002276974 PREDICTED: uncharacterized protein LOC100266667 [Vitis vinifera].
scaffold_6115_6410	2.39	4	g9102.t1	XP_002276706 PREDICTED: uncharacterized protein LOC100251108 [Vitis vinifera].
scaffold_74033_763	2.39	4
scaffold_10534_3929	2.39	4	g13493.t1	XP_004289729 PREDICTED: probable pectate lyase 8 [Fragaria vesca subsp. vesca].
scaffold_17400_4358	2.39	4
scaffold_17400_4363	2.39	4
scaffold_29610_1729	2.39	4	g25865.t1	XP_002284388 PREDICTED: DNA repair protein XRCC4 isoform X1 [Vitis vinifera].
scaffold_33200_1441	2.39	4
scaffold_33200_1542	2.39	4
scaffold_46954_445	2.39	4
scaffold_6115_3907	2.39	4	g9102.t1	XP_002276706 PREDICTED: uncharacterized protein LOC100251108 [Vitis vinifera].
scaffold_6115_3908	2.39	4	g9102.t1	XP_002276706 PREDICTED: uncharacterized protein LOC100251108 [Vitis vinifera].
scaffold_6115_6379	2.39	4	g9102.t1	XP_002276706 PREDICTED: uncharacterized protein LOC100251108 [Vitis vinifera].
scaffold_64185_535	2.39	4
scaffold_74033_762	2.39	4
scaffold_88382_682	2.39	4
scf105g	2.39	4
scaffold_42523_2226	3.33	4
scaffold_5615_8728	3.33	4	g8579.t1	XP_003635401 PREDICTED: G-type lectin S-receptor-like serine/threonine-protein kinase At1g11410-like, partial [Vitis vinifera].
scaffold_5120_1454	3.33	4	g8019.t1	XP_002510965 receptor protein kinase, putative [Ricinus communis].
scaffold_155464_207	3.33	4
scaffold_16354_3959	3.33	4
scaffold_31187_2503	3.33	4
scaffold_4404_8428	3.33	4	g7150.t1	XP_003546119 PREDICTED: F-box/kelch-repeat protein At3g23880-like isoform X1 [Glycine max].
scaffold_4404_8433	3.33	4	g7150.t1	XP_003546119 PREDICTED: F-box/kelch-repeat protein At3g23880-like isoform X1 [Glycine max].
scaffold_2971_4707	3.33	4	g5239.t1	XP_004162521 PREDICTED: TBC1 domain family member 13-like [Cucumis sativus].
scaffold_2971_4637	3.33	4	g5239.t1	XP_004162521 PREDICTED: TBC1 domain family member 13-like [Cucumis sativus].
scaffold_2971_4766	4.18	4	g5239.t1	XP_004162521 PREDICTED: TBC1 domain family member 13-like [Cucumis sativus].
scaffold_49749_788	4.18	4
scaffold_15375_4951	4.18	4	g17392.t1	No BLAST Hit
vm83024	4.18	4
scaffold_23835_1563	4.18	4	g22963.t1	NP_175926 TBP-associated factor 7 [Arabidopsis thaliana].
scaffold_2053_2139	4.61	4	g3945.t1	XP_004295757 PREDICTED: pentatricopeptide repeat-containing protein At1g12300, mitochondrial-like [Fragaria vesca subsp. vesca].
scaffold_10081_5658	6.31	4	g13069.t1	XP_002268156 PREDICTED: protein PRD1 isoform X1 [Vitis vinifera].
scaffold_8435_1079	7.16	4
scaffold_17095_1878	7.16	4	g18656.t1	XP_002533047 hypothetical protein RCOM_0068670 [Ricinus communis].
scaffold_20563_1957	7.16	4
scaffold_68346_1623	7.16	4
scaffold_8435_1097	7.16	4
SCF9157	7.16	4
scaffold_421_12123	7.16	4	g1115.t1	XP_002302897 predicted protein [Populus trichocarpa].
scaffold_421_12125	7.16	4	g1115.t1	XP_002302897 predicted protein [Populus trichocarpa].
scaffold_421_12126	7.16	4	g1115.t1	XP_002302897 predicted protein [Populus trichocarpa].
scaffold_6130_7167	7.16	4	g9120.t1	XP_004288991 PREDICTED: protein STRICTOSIDINE SYNTHASE-LIKE 4-like [Fragaria vesca subsp. vesca].
scaffold_421_12120	7.16	4	g1115.t1	XP_002302897 predicted protein [Populus trichocarpa].
SCF162175	7.16	4
scaffold_14868_593	7.75	4	g17025.t1	XP_002534117 endonuclease III, putative [Ricinus communis].
scaffold_14113_5197	10.23	4	g16467.t1	No BLAST Hit
scaffold_21976_1734	10.23	4	g21863.t1	XP_002329431 predicted protein [Populus trichocarpa].
scaffold_42755_973	10.23	4
scaffold_54129_1190	10.23	4
scaffold_69570_1175	10.23	4
scaffold_8435_1114	10.82	4
scaffold_68346_1733	10.82	4
scaffold_68346_1752	10.82	4
scaffold_68346_1780	10.82	4
scaffold_68346_1806	10.82	4
scaffold_68201_613	10.82	4
scf1172	10.82	4
scaffold_106626_368	10.82	4
scaffold_106626_377	10.82	4
scaffold_106626_385	10.82	4
scaffold_28119_1915	10.82	4	g25173.t1	XP_002521646 conserved hypothetical protein [Ricinus communis].
scaffold_32307_1416	10.82	4
scaffold_106626_412	10.82	4
scaffold_14113_5194	10.82	4	g16467.t1	No BLAST Hit
scaffold_1224_13094	11.32	4	g2596.t1	XP_003555681 PREDICTED: B3 domain-containing transcription factor VRN1-like isoform X1 [Glycine max].
scaffold_42755_943	11.32	4
scaffold_49537_1710	12.03	4
scaffold_9204_4798	12.51	4	g12226.t1	XP_002270767 PREDICTED: OBERON-like protein [Vitis vinifera].
scaffold_9204_5443	13.16	4	g12226.t1	XP_002270767 PREDICTED: OBERON-like protein [Vitis vinifera].
scaffold_16749_3112	13.16	4
scaffold_16749_3127	13.16	4
scaffold_53486_1411	13.16	4
scaffold_9204_4845	13.16	4	g12226.t1	XP_002270767 PREDICTED: OBERON-like protein [Vitis vinifera].
scaffold_138597_332	13.78	4
scaffold_138597_342	13.78	4
scaffold_70438_845	13.81	4
scaffold_70438_852	13.81	4
scaffold_293_13406	15.6	4	g834.t1	XP_002268030 PREDICTED: uncharacterized protein LOC100255468 [Vitis vinifera].
scaffold_158838_24	15.6	4
scaffold_158838_36	15.6	4
scaffold_158838_62	15.6	4
ct119590	15.6	4
416328_K63	15.6	4
scaffold_113790_253	15.6	4
scaffold_8435_965	15.6	4
scaffold_16749_3183	15.6	4
scaffold_1745_10073	15.6	4	g3464.t1	XP_003634855 PREDICTED: serine/threonine-protein kinase D6PKL2-like [Vitis vinifera].
scaffold_175464_217	15.6	4
scaffold_7142_5762	15.6	4	g10230.t1	XP_002283303 PREDICTED: calcium-binding protein PBP1 [Vitis vinifera].
scaffold_8435_980	15.6	4
scaffold_47054_2298	17.25	4
scaffold_47054_2317	17.25	4
SCF113389	17.98	4
scaffold_90453_156	17.98	4	g39413.t1	XP_002277169 PREDICTED: glucan endo-1,3-beta-glucosidase, basic vacuolar isoform [Vitis vinifera].
SCF72229	17.98	4
scaffold_90453_158	17.98	4	g39413.t1	XP_002277169 PREDICTED: glucan endo-1,3-beta-glucosidase, basic vacuolar isoform [Vitis vinifera].
scaffold_405_8462	18.39	4	g1084.t1	No BLAST Hit
scaffold_14223_3778	18.39	4
scaffold_405_8478	18.39	4	g1084.t1	No BLAST Hit
5ms2b12	18.45	4
scaffold_60960_209	18.45	4	g35344.t1	XP_002265300 PREDICTED: kinesin-1-like [Vitis vinifera].
scaffold_4553_1673	18.45	4	g7328.t1	XP_002265078 PREDICTED: tyrosyl-DNA phosphodiesterase 1-like [Vitis vinifera].
scaffold_27846_3448	18.58	4
scaffold_25620_2456	19.95	4
SCF140628	20.23	4
CA855F	20.23	4
scaffold_25620_2595	20.36	4
scaffold_1374_4261	20.36	4	g2848.t1	No BLAST Hit
SCF46739	20.36	4
scaffold_4761_4837	23.5	4
scaffold_4761_4853	23.5	4
vm52682	23.94	4
scaffold_21084_3315	24.72	4
scaffold_45151_2781	24.72	4
scaffold_311_12011	25	4	g878.t1	No BLAST Hit
scaffold_13096_1145	25	4	g15653.t1	XP_003590376 hypothetical protein MTR_1g059310 [Medicago truncatula].
scaffold_5952_4592	25	4	g8934.t1	XP_003529335 PREDICTED: 30S ribosomal protein S5, chloroplastic-like [Glycine max].
scaffold_13096_1158	25	4	g15653.t1	XP_003590376 hypothetical protein MTR_1g059310 [Medicago truncatula].
scaffold_20204_2267	25	4
scaffold_8860_2059	25	4	g11896.t1	No BLAST Hit
scaffold_95115_668	25	4
scaffold_44149_1218	25	4
scaffold_2126_10218	25	4
scaffold_100190_244	25	4
scaffold_21084_3281	25	4
scaffold_2126_10174	25	4
scaffold_100190_220	25	4
scaffold_95115_667	25.55	4
scaffold_97922_630	25.55	4
scaffold_590_1189	26.49	4	g1482.t1	No BLAST Hit
scaffold_90626_366	26.49	4
scaffold_100190_229	26.49	4
scaffold_90626_263	26.49	4
scaffold_90626_419	26.49	4
scaffold_90626_783	26.49	4
scaffold_90626_797	26.49	4
scaffold_14937_1897	26.49	4	g17065.t1	XP_002509419 glutaredoxin, grx, putative [Ricinus communis].
scaffold_143372_297	26.49	4
scaffold_590_1198	26.49	4	g1482.t1	No BLAST Hit
scaffold_90626_453	26.49	4
scaffold_4724_2880	26.77	4
scaffold_93693_309	26.77	4
scaffold_97922_695	26.77	4
scaffold_8860_2075	26.77	4	g11896.t1	No BLAST Hit
SCF6530	26.79	4
scaffold_32238_721	26.79	4	g27071.t1	No BLAST Hit
scaffold_14937_1946	26.79	4	g17065.t1	XP_002509419 glutaredoxin, grx, putative [Ricinus communis].
scaffold_90626_420	26.79	4
scaffold_16032_5807	27.06	4
scaffold_16540_5236	27.06	4
scaffold_16540_5244	27.06	4
scaffold_23760_3475	27.34	4
scaffold_47518_2554	27.34	4	g32301.t1	No BLAST Hit
scaffold_45191_576	28.13	4
scaffold_90402_451	28.13	4
scaffold_80493_282	28.18	4
scaffold_3474_6975	28.7	4	g5945.t1	XP_002276679 PREDICTED: probable ATP-dependent RNA helicase DHX35 isoform X1 [Vitis vinifera].
scaffold_90402_452	29.33	4
scaffold_25483_2965	29.33	4
scaffold_25483_644	29.33	4
scaffold_9712_1323	29.33	4
scaffold_9712_1352	29.33	4
scaffold_81503_1092	29.33	4
scaffold_195_14754	29.33	4	g602.t1	XP_002512175 conserved hypothetical protein [Ricinus communis].
SCF124075	29.33	4
scaffold_24035_2128	29.33	4
scaffold_1599_6682	29.33	4	g3221.t1	XP_002307132 hypothetical protein POPTR_0005s08690g [Populus trichocarpa].
scaffold_13076_780	29.33	4	g15642.t1	XP_003546023 PREDICTED: GDSL esterase/lipase At1g28600-like [Glycine max].
scaffold_20038_5099	29.33	4	g20632.t1	XP_002310644 predicted protein [Populus trichocarpa].
scaffold_37794_2052	29.33	4
scaffold_195_14929	29.89	4	g602.t1	XP_002512175 conserved hypothetical protein [Ricinus communis].
scaffold_113453_514	29.89	4
scaffold_113453_577	29.89	4
scaffold_113550_188	29.89	4
scaffold_116983_232	29.89	4
scaffold_131343_240	29.89	4
scaffold_169448_97	29.89	4
scaffold_170656_108	29.89	4
scaffold_18008_3339	29.89	4	g19289.t1	XP_002964011 hypothetical protein SELMODRAFT_405593 [Selaginella moellendorffii].
scaffold_18008_673	29.89	4	g19289.t1	XP_002964011 hypothetical protein SELMODRAFT_405593 [Selaginella moellendorffii].
scaffold_222939_110	29.89	4
scaffold_2295_2038	29.89	4	g4306.t1	No BLAST Hit
scaffold_2436_5595	29.89	4
scaffold_55482_425	29.89	4
scaffold_59299_131	29.89	4
scf6955c	29.89	4
scaffold_41942_2055	29.89	4
vm52204	29.89	4
scaffold_41942_2053	29.89	4
scaffold_2159_1339	29.89	4	g4100.t1	No BLAST Hit
scaffold_65798_429	29.89	4
scaffold_18008_3233	29.89	4	g19289.t1	XP_002964011 hypothetical protein SELMODRAFT_405593 [Selaginella moellendorffii].
scaffold_18851_2161	29.89	4
scaffold_116983_281	29.89	4
scaffold_18755_3744	29.89	4	g19786.t1	No BLAST Hit
scaffold_18755_3774	29.89	4	g19786.t1	No BLAST Hit
scaffold_55482_414	29.89	4
scaffold_60471_1576	29.89	4
scaffold_9605_3252	29.89	4	g12605.t1	XP_002266263 PREDICTED: uncharacterized protein LOC100253264 [Vitis vinifera].
scaffold_62076_862	30.17	4	g35559.t1	XP_002330656 predicted protein [Populus trichocarpa].
scaffold_45782_2291	31.3	4	g31834.t1	No BLAST Hit
scaffold_39165_111	31.31	4	g29717.t1	XP_004165548 PREDICTED: potassium transporter 5-like [Cucumis sativus].
scaffold_85652_525	31.31	4
SCF28100	32.32	4
scaffold_18755_3637	32.32	4	g19786.t1	No BLAST Hit
scaffold_24341	32.32	4
305731_K63	32.32	4
scaffold_4308_7311	32.32	4
scaffold_48281_2402	32.32	4	g32497.t1	YP_588300 hypothetical protein ZeamMp038 (mitochondrion) [Zea mays subsp. mays].
scaffold_48281_2501	32.32	4	g32497.t1	YP_588300 hypothetical protein ZeamMp038 (mitochondrion) [Zea mays subsp. mays].
scaffold_48281_2513	32.32	4	g32497.t1	YP_588300 hypothetical protein ZeamMp038 (mitochondrion) [Zea mays subsp. mays].
scaffold_38771_2073	32.32	4
scaffold_31590_2799	32.72	4
scaffold_23637_4496	32.88	4
scaffold_120214	32.91	4
scaffold_52689_990	33.26	4
scaffold_48281_2414	33.3	4	g32497.t1	YP_588300 hypothetical protein ZeamMp038 (mitochondrion) [Zea mays subsp. mays].
scaffold_82274_764	33.58	4
scaffold_24358_3619	33.58	4
scaffold_80923_1125	33.58	4
scaffold_34688_1347	33.58	4
scaffold_59657_1014	33.58	4
scaffold_34688_1306	33.58	4
scaffold_80923_1123	33.58	4
scaffold_1430_7505	33.58	4	g2935.t1	XP_002515735 conserved hypothetical protein [Ricinus communis].
scaffold_10827_3635	33.58	4
scaffold_1294_2260	33.58	4	g2721.t1	XP_002323994 hypothetical protein POPTR_0017s10560g [Populus trichocarpa].
scaffold_1294_2276	33.58	4	g2721.t1	XP_002323994 hypothetical protein POPTR_0017s10560g [Populus trichocarpa].
scaffold_1294_2277	33.58	4	g2721.t1	XP_002323994 hypothetical protein POPTR_0017s10560g [Populus trichocarpa].
scaffold_1294_2285	33.58	4	g2721.t1	XP_002323994 hypothetical protein POPTR_0017s10560g [Populus trichocarpa].
scaffold_1300_4066	33.58	4
scaffold_30462_3299	33.58	4
scaffold_33303_1078	33.58	4
scaffold_33303_1080	33.58	4
scaffold_33303_2554	33.58	4
scaffold_33303_2712	33.58	4
scaffold_36250_2078	33.58	4
scaffold_59657_981	33.58	4
scaffold_6270_6464	33.86	4	g9278.t1	XP_002270226 PREDICTED: squamosa promoter-binding-like protein 16 [Vitis vinifera].
scaffold_57296_2225	33.86	4
scaffold_191_17358	33.86	4	g593.t1	XP_002514929 GTP binding protein, putative [Ricinus communis].
scaffold_57296_2125	33.86	4
scaffold_58550_910	33.86	4
scaffold_6270_6500	33.86	4	g9278.t1	XP_002270226 PREDICTED: squamosa promoter-binding-like protein 16 [Vitis vinifera].
scaffold_26143_262	33.86	4	g24214.t1	XP_003631849 PREDICTED: uncharacterized protein LOC100259900 [Vitis vinifera].
scaffold_15914_3804	33.86	4
scaffold_63608_809	34.72	4	g35829.t1	XP_002890709 transferase family protein [Arabidopsis lyrata subsp. lyrata].
scaffold_99451_668	34.72	4
scaffold_9081_1399	34.86	4	g12110.t1	XP_004159685 PREDICTED: 60S ribosomal protein L17-2-like [Cucumis sativus].
scaffold_24358_3519	34.86	4
scaffold_54382_172	34.86	4
scaffold_58550_1006	34.86	4
scaffold_26143_204	34.86	4	g24214.t1	XP_003631849 PREDICTED: uncharacterized protein LOC100259900 [Vitis vinifera].
scaffold_26143_193	34.86	4	g24214.t1	XP_003631849 PREDICTED: uncharacterized protein LOC100259900 [Vitis vinifera].
scaffold_26143_211	34.86	4	g24214.t1	XP_003631849 PREDICTED: uncharacterized protein LOC100259900 [Vitis vinifera].
scaffold_9081_1388	35.06	4	g12110.t1	XP_004159685 PREDICTED: 60S ribosomal protein L17-2-like [Cucumis sativus].
SCF154541	35.64	4
scaffold_6878_7959	36.85	4
scaffold_30082_1361	36.85	4	g26089.t1	XP_004310203 PREDICTED: OTU domain-containing protein At3g57810-like isoform X2 [Fragaria vesca subsp. vesca].
scaffold_1228_3985	36.85	4
scaffold_1228_4011	36.85	4
scaffold_1300_3183	36.85	4
scaffold_25210_859	36.85	4	g23709.t1	XP_004241860 PREDICTED: glutamate receptor 2.8-like [Solanum lycopersicum].
scaffold_3760_922	36.85	4
scaffold_64658_1073	36.85	4
scaffold_68686_1244	36.85	4
scaffold_68686_1291	36.85	4
scaffold_68686_1292	36.85	4
scaffold_42834_865	36.85	4
scaffold_42834_867	36.85	4
scaffold_18247_5405	36.85	4
scaffold_30462_3194	37.98	4
scaffold_11914_4853	38.83	4	g14676.t1	XP_002272517 PREDICTED: peroxisome biogenesis factor 10 [Vitis vinifera].
scaffold_51514_2267	38.83	4
SCF38553	39.4	4
scaffold_7544_7265	40.25	4
scaffold_69505_1274	41.39	4
scaffold_3706_3322	41.39	4	g6283.t1	XP_004239156 PREDICTED: actin-related protein 3 [Solanum lycopersicum].
scaffold_3706_3323	41.39	4	g6283.t1	XP_004239156 PREDICTED: actin-related protein 3 [Solanum lycopersicum].
SCF15845	41.47	4
scaffold_23531_3468	43.24	4
scaffold_55661_317	43.24	4	g34194.t1	XP_003631262 PREDICTED: probable nucleoredoxin 1-like [Vitis vinifera].
scaffold_55661_329	43.24	4	g34194.t1	XP_003631262 PREDICTED: probable nucleoredoxin 1-like [Vitis vinifera].
scaffold_55661_368	43.24	4	g34194.t1	XP_003631262 PREDICTED: probable nucleoredoxin 1-like [Vitis vinifera].
scaffold_55661_419	43.24	4	g34194.t1	XP_003631262 PREDICTED: probable nucleoredoxin 1-like [Vitis vinifera].
scaffold_55661_429	43.24	4	g34194.t1	XP_003631262 PREDICTED: probable nucleoredoxin 1-like [Vitis vinifera].
scaffold_65387_812	43.86	4	g36150.t1	XP_002272174 PREDICTED: protein TRANSPARENT TESTA 12-like [Vitis vinifera].
scaffold_65387_813	43.86	4	g36150.t1	XP_002272174 PREDICTED: protein TRANSPARENT TESTA 12-like [Vitis vinifera].
scaffold_37097_3046	43.86	4
scaffold_6531_346	44.73	4
scaffold_12301_5325	45.31	4	g14990.t1	XP_004301927 PREDICTED: putative ribonuclease H protein At1g65750-like [Fragaria vesca subsp. vesca].
scaffold_22674_919	45.88	4
SCF194552	45.88	4
scaffold_50216_824	45.88	4
scaffold_55661_422	45.88	4	g34194.t1	XP_003631262 PREDICTED: probable nucleoredoxin 1-like [Vitis vinifera].
scaffold_558_1398	45.88	4	g1398.t1	XP_002328587 predicted protein, partial [Populus trichocarpa].
scaffold_43310_811	45.88	4
scaffold_49282_741	46.45	4
scaffold_22849_2855	46.45	4	g22380.t1	XP_002267769 PREDICTED: phosphatidylinositol 3-kinase, root isoform isoform X1 [Vitis vinifera].
scaffold_22807_3751	46.45	4
scaffold_22657_800	46.45	4
scaffold_83153_778	46.74	4
scaffold_41385_1874	46.74	4
scaffold_8390_6599	46.74	4
scaffold_4752_1024	46.85	4	g7574.t1	XP_002967769 hypothetical protein SELMODRAFT_409048 [Selaginella moellendorffii].
scaffold_51054_1974	46.85	4
scaffold_23531_2867	46.85	4
scaffold_23531_2897	46.85	4
scaffold_46948_2420	46.85	4
scaffold_46948_2472	46.85	4
scaffold_46948_2486	46.85	4
scaffold_7174_2893	46.85	4	g10268.t1	XP_003635556 PREDICTED: phosphate transporter PHO1 homolog 3-like [Vitis vinifera].
scaffold_42437_2720	48.03	4
scaffold_20122_2272	48.03	4	g20692.t1	XP_002307978 predicted protein [Populus trichocarpa].
scaffold_42437_2734	48.03	4
scaffold_1015_13487	48.03	4	g2229.t1	XP_002271234 PREDICTED: pyruvate dehydrogenase E1 component subunit alpha, mitochondrial [Vitis vinifera].
scaffold_1015_8686	49.28	4	g2229.t1	XP_002271234 PREDICTED: pyruvate dehydrogenase E1 component subunit alpha, mitochondrial [Vitis vinifera].
scaffold_6529_1808	50.14	4	g9573.t1	XP_003631283 PREDICTED: uncharacterized protein LOC100853229 [Vitis vinifera].
scaffold_60004_1026	50.14	4
scaffold_37520_101	50.14	4
scaffold_60004_1142	50.14	4
scaffold_7174_2882	50.14	4	g10268.t1	XP_003635556 PREDICTED: phosphate transporter PHO1 homolog 3-like [Vitis vinifera].
scaffold_953_14029	50.14	4	g2122.t1	XP_002520213 conserved hypothetical protein [Ricinus communis].
scaffold_36277_2655	50.14	4
scaffold_31313_1900	55.85	4
scaffold_2746_7470	55.85	4	g4940.t1	XP_004235782 PREDICTED: Down syndrome critical region protein 3 isoform X1 [Solanum lycopersicum].
scaffold_17932_2821	55.85	4	g19234.t1	XP_002329728 predicted protein [Populus trichocarpa].
scaffold_31313_1886	56.42	4
scaffold_17932_2804	56.42	4	g19234.t1	XP_002329728 predicted protein [Populus trichocarpa].
SCF16359	56.42	4
scaffold_7894_1547	56.9	4	g10955.t1	No BLAST Hit
SCF96539	56.9	4
scaffold_61487_1055	58.69	4
scaffold_61487_1057	58.69	4
scaffold_61487_1084	58.69	4
scaffold_61487_1101	58.69	4
scaffold_43230_2294	58.69	4
scaffold_43230_2307	58.69	4
scaffold_43230_2312	58.69	4
scaffold_5443_4548	58.69	4	g8402.t1	XP_002317908 predicted protein [Populus trichocarpa].
scaffold_5443_4559	58.69	4	g8402.t1	XP_002317908 predicted protein [Populus trichocarpa].
SCF100820	59.88	4
NA1713	59.88	4
scaffold_12816_2498	62.26	4
SCF79014	62.26	4
scf24k	62.26	4
SCF204979	62.26	4
scaffold_51535	62.26	4
scaffold_3314	62.26	4
scaffold_5180	62.26	4
SCF101064	62.31	4
scaffold_14096_210	63.82	4
scaffold_45116_2562	64.87	4	g31625.t1	XP_002280834 PREDICTED: uncharacterized protein LOC100260312 [Vitis vinifera].
scaffold_23446_3911	64.87	4	g22719.t1	XP_002328642 predicted protein [Populus trichocarpa].
scaffold_23446_3933	64.87	4	g22719.t1	XP_002328642 predicted protein [Populus trichocarpa].
scaffold_824_4565	65.81	4	g1911.t1	XP_002281604 PREDICTED: probable LRR receptor-like serine/threonine-protein kinase At1g74360 [Vitis vinifera].
scaffold_70138_1297	65.83	4
scaffold_14433_4162	65.83	4
scaffold_14433_4163	65.83	4
scaffold_26277_821	65.83	4	g24292.t1	XP_004234315 PREDICTED: 40S ribosomal protein SA-like [Solanum lycopersicum].
scaffold_14433_4250	65.83	4
scaffold_88972_309	68.81	4
scaffold_4386_589	68.81	4	g7131.t1	XP_002511562 conserved hypothetical protein [Ricinus communis].
scaffold_26277_1001	68.81	4	g24292.t1	XP_004234315 PREDICTED: 40S ribosomal protein SA-like [Solanum lycopersicum].
scaffold_70138_1273	68.89	4
scaffold_3197_1821	68.89	4	g5569.t1	XP_002282635 PREDICTED: putative exosome complex component rrp40 [Vitis vinifera].
scaffold_3197_1888	68.89	4	g5569.t1	XP_002282635 PREDICTED: putative exosome complex component rrp40 [Vitis vinifera].
scaffold_4386_6805	68.89	4	g7131.t1	XP_002511562 conserved hypothetical protein [Ricinus communis].
scaffold_3122_7154	69.82	4	g5460.t1	No BLAST Hit
scaffold_14958_5099	69.82	4
scaffold_4550_4483	69.82	4	g7325.t1	XP_002277262 PREDICTED: uncharacterized protein LOC100255272 isoform X1 [Vitis vinifera].
contig600	69.82	4
SCF49598	70.59	4
scaffold_51672_24	71.24	4
scaffold_115_16042	75.26	4	g396.t1	XP_002279380 PREDICTED: 3-oxoacyl-[acyl-carrier-protein] reductase 4 [Vitis vinifera].
scaffold_9084_2870	75.26	4	g12114.t1	XP_002273888 PREDICTED: uncharacterized protein LOC100247465 [Vitis vinifera].
scaffold_126864_232	75.44	4
scaffold_19131_4160	75.44	4
[truncated: 4,080 more rows]

## Sheet: All QTL
Dataset4. The 252 cranberry QTL identified for fruit shape and size descriptors in a three-year period
		Trait	Year	Chromosome	Position (cM)	Nearest marker	Marker variance	Model variance	1.5 LOD interval
		len	14	2	37.37	bin_2@37.37cM_scaffold_5976_6782	2.68844	78.361	13.3
		len	14	2	58.09	bin_2@58.09cM_scaffold_6617_6407	7.75065	78.361	3.9
		len	14	4	4.18	bin_4@4.18cM_scaffold_2971_4766	2.21792	78.361	10.77
		len	14	4	68.81	bin_4@68.81cM_scaffold_88972_309	3.09826	78.361	13
		len	14	6	2.19	bin_6@2.19cM_SCF109269	7.60956	78.361	1.88
		len	14	7	68.54	bin_7@68.54cM_scaffold_49549_2235	2.09297	78.361	27.19
		len	14	9	88.51	bin_9@88.51cM_scaffold_17431_1305	5.02748	78.361	8.97
		len	14	10	14.96	bin_10@14.96cM_scaffold_26452_1178	2.9012	78.361	22.41
		len	14	10	44.43	bin_10@44.43cM_scaffold_46144_2710	6.40355	78.361	8.21
		len	14	11	24.54	bin_11@24.54cM_scaffold_113473_247	2.67617	78.361	15.78
		len	14	11	81.23	bin_11@81.23cM_scaffold_2449_1103	11.2981	78.361	5.4
		len	14	12	49.4	bin_12@49.4cM_scaffold_40948_2457	8.94924	78.361	4.79
		wid	14	1	105.72	bin_1@105.72cM_scaffold_75017_350	16.2837	77.8591	4.37
		wid	14	2	75	bin_2@75cM_scaffold_13401_1927	2.30903	77.8591	45.03
		wid	14	4	3.33	bin_4@3.33cM_scaffold_42523_2226	3.3653	77.8591	10.77
		wid	14	6	0	bin_6@0cM_scaffold_137684_431	5.24141	77.8591	2.19
		wid	14	7	7.62	bin_7@7.62cM_scaffold_12393_6574	4.82717	77.8591	16.77
		wid	14	7	60.62	bin_7@60.62cM_scaffold_94354_1052	8.62069	77.8591	8.31
		wid	14	8	52.93	bin_8@52.93cM_scaffold_7472_6967	5.38983	77.8591	7.67
		wid	14	9	21.17	bin_9@21.17cM_scaffold_34067_2425	4.85948	77.8591	17.09
		wid	14	9	84.22	bin_9@84.22cM_scaffold_30128_1137	8.4736	77.8591	6.2
		wid	14	10	77.28	bin_10@77.28cM_vm38401	4.64675	77.8591	8.75
		wid	14	11	57.63	bin_11@57.63cM_scaffold_1316_996	2.87909	77.8591	4.33
		wid	14	12	57.23	bin_12@57.23cM_scaffold_5160_1395	2.61077	77.8591	16.62
		area	14	1	101.6	bin_1@101.6cM_scaffold_29057_3354	10.7469	78.1916	4.77
		area	14	2	54.47	bin_2@54.47cM_scaffold_5394_8263	9.82695	78.1916	10.32
		area	14	4	4.61	bin_4@4.61cM_scaffold_2053_2139	3.45348	78.1916	8.43
		area	14	4	37.98	bin_4@37.98cM_scaffold_30462_3194	2.56757	78.1916	8.67
		area	14	6	2.19	bin_6@2.19cM_SCF109269	8.20807	78.1916	1.88
		area	14	7	17.48	bin_7@17.48cM_scaffold_50033_1488	3.22935	78.1916	17.39
		area	14	7	60.62	bin_7@60.62cM_scaffold_94354_1052	5.22342	78.1916	8.31
		area	14	9	88.8	bin_9@88.8cM_scaffold_78646_1274	6.17022	78.1916	4.74
		area	14	10	9.55	bin_10@9.55cM_scaffold_6239_3448	3.00746	78.1916	13.68
		area	14	10	44.43	bin_10@44.43cM_scaffold_46144_2710	6.1928	78.1916	3.45
		area	14	11	79.75	bin_11@79.75cM_scaffold_27128_4325	9.58999	78.1916	5.4
		area	14	12	54.11	bin_12@54.11cM_scaffold_47570_2090	3.5486	78.1916	7.85
		ecc	14	1	30.56	bin_1@30.56cM_scaffold_22095_4371	4.58558	84.0146	1.22
		ecc	14	1	106.17	bin_1@106.17cM_scaffold_32417_1191	7.84774	84.0146	10.09
		ecc	14	2	22.53	bin_2@22.53cM_scaffold_28792_1608	6.48694	84.0146	16.96
		ecc	14	2	62.07	bin_2@62.07cM_scaffold_20695_3165	7.10776	84.0146	4.55
		ecc	14	3	5.41	bin_3@5.41cM_scaffold_10802_5013	2.74515	84.0146	14.32
		ecc	14	4	58.69	bin_4@58.69cM_scaffold_61487_1055	2.92349	84.0146	5.36
		ecc	14	5	43.28	bin_5@43.28cM_scaffold_16038_4727	4.77718	84.0146	6.81
		ecc	14	6	45.6	bin_6@45.6cM_scaffold_37239_2606	5.81353	84.0146	5.11
		ecc	14	7	49.58	bin_7@49.58cM_scaffold_11351_6036	2.47499	84.0146	22.87
		ecc	14	11	23.86	bin_11@23.86cM_scaffold_101041_374	3.80335	84.0146	15.6
		ecc	14	11	81.23	bin_11@81.23cM_scaffold_2449_1103	7.46083	84.0146	16.78
		ecc	14	12	40.53	bin_12@40.53cM_scaffold_3092_8217	8.84927	84.0146	10.15
		LW	14	1	30.57	bin_1@30.57cM_SCF43220	4.92864	83.0129	2.29
		LW	14	1	106.17	bin_1@106.17cM_scaffold_32417_1191	9.66723	83.0129	10.09
		LW	14	2	13.06	bin_2@13.06cM_scaffold_59091_93	5.65783	83.0129	8.39
		LW	14	2	59.23	bin_2@59.23cM_scaffold_2711_7365	9.83523	83.0129	3.9
		LW	14	3	11.2	bin_3@11.2cM_scaffold_8209_2932	2.87648	83.0129	7.8
		LW	14	4	58.69	bin_4@58.69cM_scaffold_61487_1055	2.78635	83.0129	7.4
		LW	14	5	45.18	bin_5@45.18cM_scaffold_6777_7504	3.07684	83.0129	9.63
		LW	14	6	45.6	bin_6@45.6cM_scaffold_37239_2606	5.98647	83.0129	5.11
		LW	14	7	38.26	bin_7@38.26cM_scaffold_48675_2016	3.05933	83.0129	19.05
		LW	14	11	23.86	bin_11@23.86cM_scaffold_101041_374	3.29574	83.0129	15.6
		LW	14	11	81.23	bin_11@81.23cM_scaffold_2449_1103	8.53321	83.0129	9.09
		LW	14	12	49.4	bin_12@49.4cM_scaffold_40948_2457	8.02233	83.0129	22.06
		pc1	14	1	18.41	bin_1@18.41cM_scaffold_144559_324	3.54975	82.497	23.62
		pc1	14	1	105.72	bin_1@105.72cM_scaffold_75017_350	16.9513	82.497	4.65
		pc1	14	2	19.17	bin_2@19.17cM_scaffold_4235_7663	7.47876	82.497	11.34
		pc1	14	2	63.49	bin_2@63.49cM_scaffold_209315_135	7.49598	82.497	6
		pc1	14	5	20.63	bin_5@20.63cM_scaffold_47787_264	2.87414	82.497	17.02
		pc1	14	6	45.6	bin_6@45.6cM_scaffold_37239_2606	3.51097	82.497	13.92
		pc1	14	8	5.46	bin_8@5.46cM_scaffold_47892_200	3.05032	82.497	8.4
		pc1	14	9	52.54	bin_9@52.54cM_scaffold_121346_260	3.41535	82.497	7.92
		pc1	14	9	85.12	bin_9@85.12cM_scaffold_52643_2159	5.78762	82.497	4.49
		pc1	14	11	23.86	bin_11@23.86cM_scaffold_101041_374	5.19568	82.497	14.76
		pc1	14	11	75.64	bin_11@75.64cM_scaffold_28041_700	7.36961	82.497	2.67
		pc1	14	12	54.39	bin_12@54.39cM_scaffold_70077_1397	4.97412	82.497	7.26
		pc2	14	1	105.72	bin_1@105.72cM_scaffold_75017_350	7.30805	87.6809	4.18
		pc2	14	2	57.45	bin_2@57.45cM_SCF125667	7.85549	87.6809	1.42
		pc2	14	5	50.92	bin_5@50.92cM_scaffold_39811_2771	3.19737	87.6809	7.42
		pc2	14	6	40.53	bin_6@40.53cM_scaffold_39976_482	4.22105	87.6809	4.64
		pc2	14	8	14.95	bin_8@14.95cM_scaffold_135908_391	3.16407	87.6809	13.95
		pc2	14	8	53.14	bin_8@53.14cM_scaffold_28279_2688	2.83129	87.6809	5.72
		pc2	14	9	56.29	bin_9@56.29cM_scaffold_22252_4623	2.71972	87.6809	7.48
		pc2	14	9	85.12	bin_9@85.12cM_scaffold_52643_2159	6.16099	87.6809	7.55
		pc2	14	10	3.59	bin_10@3.59cM_SCF23210	1.55138	87.6809	6.02
		pc2	14	10	35.42	bin_10@35.42cM_scaffold_2979_9917	8.8702	87.6809	4.17
		pc2	14	11	40.34	bin_11@40.34cM_scaffold_3947_9416	3.66288	87.6809	5.95
		pc2	14	12	54.96	bin_12@54.96cM_scaffold_2841_5173	7.88485	87.6809	6.19
		len	15	2	21.4	bin_2@21.4cM_scaffold_8019_6341	6.30966	79.6412	9.34
		len	15	2	85.97	bin_2@85.97cM_scaffold_10729_6216	3.95527	79.6412	7.75
		len	15	4	64.87	bin_4@64.87cM_scaffold_45116_2562	7.97721	79.6412	16.57
		len	15	5	43.85	bin_5@43.85cM_scaffold_43157_898	3.55409	79.6412	9.63
		len	15	5	60.97	bin_5@60.97cM_scaffold_1210_954	2.12865	79.6412	11.32
		len	15	6	24.59	bin_6@24.59cM_scaffold_1462_6406	3.30435	79.6412	35.29
		len	15	7	56.06	bin_7@56.06cM_scaffold_15867_4759	5.11983	79.6412	6.13
		len	15	8	25.19	bin_8@25.19cM_SCF8850	4.62136	79.6412	11.46
		len	15	8	50.16	bin_8@50.16cM_scaffold_34700_1827	2.56488	79.6412	11.08
		len	15	8	72.97	bin_8@72.97cM_scaffold_37461_3262	2.62355	79.6412	17.46
		len	15	11	14.62	bin_11@14.62cM_scaffold_57381_750	10.3557	79.6412	3.66
		len	15	11	79.33	bin_11@79.33cM_scaffold_56695_1863	18.7328	79.6412	4.11
		wid	15	1	9.43	bin_1@9.43cM_scaffold_9160_2298	2.35688	84.1144	3.06
		wid	15	1	102.73	bin_1@102.73cM_scaffold_15803_354	12.6823	84.1144	5.88
		wid	15	4	64.87	bin_4@64.87cM_scaffold_45116_2562	3.60634	84.1144	11.13
		wid	15	7	16.77	bin_7@16.77cM_SCF36745	1.8287	84.1144	4.54
		wid	15	7	56.06	bin_7@56.06cM_scaffold_15867_4759	5.91837	84.1144	6.13
		wid	15	8	70.35	bin_8@70.35cM_scaffold_9073_7294	7.81508	84.1144	9.76
		wid	15	9	82.31	bin_9@82.31cM_scaffold_11296_2620	3.06412	84.1144	11.95
		wid	15	10	58.43	bin_10@58.43cM_scaffold_36213_544	3.003	84.1144	24.12
		wid	15	11	14.62	bin_11@14.62cM_scaffold_57381_750	10.3551	84.1144	11.64
		wid	15	11	53.59	bin_11@53.59cM_scaffold_55939_484	2.80557	84.1144	9.73
		wid	15	11	81.23	bin_11@81.23cM_scaffold_2449_1103	5.65017	84.1144	5.4
		wid	15	12	38.11	bin_12@38.11cM_scaffold_26512_1632	6.23232	84.1144	14.31
		area	15	1	9.43	bin_1@9.43cM_scaffold_9160_2298	3.22939	81.4233	3.72
		area	15	1	105.72	bin_1@105.72cM_scaffold_75017_350	8.99202	81.4233	10.09
		area	15	2	21.4	bin_2@21.4cM_scaffold_8019_6341	2.83308	81.4233	11.34
		area	15	4	64.87	bin_4@64.87cM_scaffold_45116_2562	4.73272	81.4233	7.12
		area	15	5	52.34	bin_5@52.34cM_scaffold_2015_8532	3.5344	81.4233	51.2
		area	15	5	60.97	bin_5@60.97cM_scaffold_1210_954	3.4581	81.4233	3.41
		area	15	7	56.06	bin_7@56.06cM_scaffold_15867_4759	8.38581	81.4233	6.13
		area	15	8	76.65	bin_8@76.65cM_scaffold_2175_6019	5.19011	81.4233	11.25
		area	15	11	15.29	bin_11@15.29cM_scaffold_24233_376	12.3502	81.4233	3.66
		area	15	11	54.78	bin_11@54.78cM_scaffold_49216_1283	3.24295	81.4233	4.19
		area	15	11	79.75	bin_11@79.75cM_scaffold_27128_4325	7.49881	81.4233	5.4
		area	15	12	54.96	bin_12@54.96cM_scaffold_2841_5173	4.0397	81.4233	5.11
		ecc	15	1	107.52	bin_1@107.52cM_scaffold_3011_100	6.22332	81.1306	7.1
		ecc	15	2	21.4	bin_2@21.4cM_scaffold_8019_6341	13.7957	81.1306	4.45
		ecc	15	2	78.4	bin_2@78.4cM_scaffold_3671_8042	6.84909	81.1306	11.62
		ecc	15	3	60.96	bin_3@60.96cM_scaffold_26817_3858	4.32616	81.1306	12.41
		ecc	15	5	42.43	bin_5@42.43cM_scaffold_4687_1875	2.91926	81.1306	11.05
		ecc	15	6	45.8	bin_6@45.8cM_scaffold_66897_943	6.59585	81.1306	3.13
		ecc	15	6	73.21	bin_6@73.21cM_scaffold_36_10300	2.2384	81.1306	18.03
		ecc	15	9	89.29	bin_9@89.29cM_scaffold_194_6347	2.94979	81.1306	1.35
		ecc	15	10	9.55	bin_10@9.55cM_scaffold_6239_3448	2.4732	81.1306	9.22
		ecc	15	11	14.62	bin_11@14.62cM_scaffold_57381_750	10.1909	81.1306	4.22
		ecc	15	11	75.64	bin_11@75.64cM_scaffold_28041_700	8.82667	81.1306	6.39
		ecc	15	12	50.47	bin_12@50.47cM_scaffold_10505_3485	8.43442	81.1306	4.79
		LW	15	1	107.38	bin_1@107.38cM_scaffold_64976_957	5.26665	80.5147	10.09
		LW	15	2	21.4	bin_2@21.4cM_scaffold_8019_6341	16.9507	80.5147	4.45
		LW	15	2	87.96	bin_2@87.96cM_scaffold_90528_1718	7.25548	80.5147	7.47
		LW	15	3	63.52	bin_3@63.52cM_scaffold_9359_4141	3.75797	80.5147	12.41
		LW	15	5	45.18	bin_5@45.18cM_scaffold_6777_7504	3.71847	80.5147	13.87
		LW	15	6	45.8	bin_6@45.8cM_scaffold_66897_943	6.71986	80.5147	10.07
		LW	15	9	2.53	bin_9@2.53cM_scaffold_210_510	1.63917	80.5147	71.69
		LW	15	9	87.38	bin_9@87.38cM_scaffold_160418_51	2.91069	80.5147	5.9
		LW	15	10	9.55	bin_10@9.55cM_scaffold_6239_3448	3.18869	80.5147	9.22
		LW	15	11	14.62	bin_11@14.62cM_scaffold_57381_750	10.8482	80.5147	11.64
		LW	15	11	75.64	bin_11@75.64cM_scaffold_28041_700	8.59508	80.5147	11.37
		LW	15	12	49.4	bin_12@49.4cM_scaffold_40948_2457	10.184	80.5147	4.79
		pc1	15	1	78.6	bin_1@78.6cM_scaffold_29336_265	8.86251	77.9062	7.11
		pc1	15	2	43.64	bin_2@43.64cM_scaffold_48048_1608	2.31446	77.9062	32.42
		pc1	15	3	62.22	bin_3@62.22cM_scaffold_20885_4545	2.06924	77.9062	34.51
		pc1	15	4	37.98	bin_4@37.98cM_scaffold_30462_3194	4.40394	77.9062	6.39
		pc1	15	6	79.24	bin_6@79.24cM_scaffold_78684_455	2.38678	77.9062	18.24
		pc1	15	7	21.42	bin_7@21.42cM_scaffold_16570_4386	3.90166	77.9062	12.68
		pc1	15	8	66.89	bin_8@66.89cM_scaffold_35515_70	6.97612	77.9062	19.73
		pc1	15	9	47.77	bin_9@47.77cM_scaffold_9114_6439	4.43796	77.9062	12.52
		pc1	15	10	70.47	bin_10@70.47cM_scaffold_3376_7137	6.84097	77.9062	10.13
		pc1	15	11	19.61	bin_11@19.61cM_scaffold_19468_3891	20.8914	77.9062	9.78
		pc1	15	11	77.45	bin_11@77.45cM_scaffold_31501_3799	13.7499	77.9062	4.11
		pc1	15	12	49.4	bin_12@49.4cM_scaffold_40948_2457	4.16963	77.9062	10.79
		pc2	15	1	6.31	bin_1@6.31cM_scaffold_9628_2399	7.96311	87.1137	6.53
		pc2	15	1	68.75	bin_1@68.75cM_scaffold_81148_991	12.0911	87.1137	6.89
		pc2	15	3	38.1	bin_3@38.1cM_scaffold_3243_9609	4.57558	87.1137	10.09
		pc2	15	4	29.33	bin_4@29.33cM_scaffold_90402_452	5.40996	87.1137	12.94
		pc2	15	5	58.41	bin_5@58.41cM_scaffold_20507_5170	7.69811	87.1137	10.33
		pc2	15	6	73.21	bin_6@73.21cM_scaffold_36_10300	3.44107	87.1137	10.08
		pc2	15	7	51.97	bin_7@51.97cM_scaffold_44609_43	2.8592	87.1137	2.73
		pc2	15	8	54.64	bin_8@54.64cM_scaffold_67225_1543	1.67634	87.1137	13.94
		pc2	15	10	72.58	bin_10@72.58cM_scaffold_158708_249	1.38701	87.1137	30.44
		pc2	15	11	23.86	bin_11@23.86cM_scaffold_101041_374	10.1562	87.1137	9.78
		pc2	15	11	84.73	bin_11@84.73cM_scaffold_52145_1927	10.1038	87.1137	6.06
		pc2	15	12	54.96	bin_12@54.96cM_scaffold_2841_5173	15.5693	87.1137	2.27
		len	16	1	15.97	bin_1@15.97cM_scaffold_25619_774	2.3974	82.0221	16.77
		len	16	1	102.54	bin_1@102.54cM_scaffold_13178_3759	6.7207	82.0221	4.77
		len	16	2	4.17	bin_2@4.17cM_scaffold_36026_1605	2.35637	82.0221	25.02
		len	16	4	3.33	bin_4@3.33cM_scaffold_42523_2226	3.34796	82.0221	11.32
		len	16	4	75.26	bin_4@75.26cM_scaffold_115_16042	3.02903	82.0221	22.04
		len	16	5	41.75	bin_5@41.75cM_scaffold_71631_1225	4.62798	82.0221	6.8
		len	16	6	19.74	bin_6@19.74cM_scf207d	6.02733	82.0221	10.3
		len	16	7	54.49	bin_7@54.49cM_scaffold_11311_2457	14.4223	82.0221	3.12
		len	16	9	87.8	bin_9@87.8cM_scaffold_70962_1187	5.13412	82.0221	10.6
		len	16	10	62.45	bin_10@62.45cM_scaffold_21402_3106	2.53207	82.0221	20.2
		len	16	11	23.86	bin_11@23.86cM_scaffold_101041_374	2.04849	82.0221	16.35
		len	16	11	91.56	bin_11@91.56cM_scaffold_79690_744	13.8035	82.0221	5.97
		wid	16	1	101.03	bin_1@101.03cM_scaffold_120913_200	11.8876	87.0243	4.77
		wid	16	2	50.21	bin_2@50.21cM_scaffold_33914_316	6.26365	87.0243	8.27
		wid	16	2	85.97	bin_2@85.97cM_scaffold_10729_6216	2.29108	87.0243	13.26
		wid	16	3	43.05	bin_3@43.05cM_scaffold_40993_3056	1.77082	87.0243	7.73
		wid	16	4	3.33	bin_4@3.33cM_scaffold_42523_2226	3.16075	87.0243	5.12
		wid	16	4	46.74	bin_4@46.74cM_scaffold_83153_778	1.96006	87.0243	17.87
		wid	16	6	11.65	bin_6@11.65cM_scaffold_42330_2535	6.86936	87.0243	11.76
		wid	16	7	54.49	bin_7@54.49cM_scaffold_11311_2457	16.954	87.0243	3.86
		wid	16	8	51.51	bin_8@51.51cM_scaffold_19566_4626	2.36222	87.0243	20.72
		wid	16	9	86.8	bin_9@86.8cM_scaffold_84032_312	6.82876	87.0243	3.39
		wid	16	11	79.75	bin_11@79.75cM_scaffold_27128_4325	2.55247	87.0243	13.93
		wid	16	12	54.39	bin_12@54.39cM_scaffold_70077_1397	4.48602	87.0243	5.11
		area	16	1	102.54	bin_1@102.54cM_scaffold_13178_3759	9.64508	85.6766	4.77
		area	16	2	50.21	bin_2@50.21cM_scaffold_33914_316	2.26878	85.6766	10.51
		area	16	4	3.33	bin_4@3.33cM_scaffold_42523_2226	5.91284	85.6766	5.82
		area	16	4	70.59	bin_4@70.59cM_SCF49598	3.7941	85.6766	14.15
		area	16	5	42.43	bin_5@42.43cM_scaffold_4687_1875	2.28528	85.6766	9.63
		area	16	6	11.65	bin_6@11.65cM_scaffold_42330_2535	6.94725	85.6766	11.76
		area	16	7	54.49	bin_7@54.49cM_scaffold_11311_2457	2.10626	85.6766	10.12
		area	16	7	60.62	bin_7@60.62cM_scaffold_94354_1052	1.89417	85.6766	12.48
		area	16	8	41.09	bin_8@41.09cM_scaffold_9117_954	1.46383	85.6766	46.18
		area	16	9	28.91	bin_9@28.91cM_scaffold_4922_2301	1.12831	85.6766	31.6
		area	16	9	87.8	bin_9@87.8cM_scaffold_70962_1187	6.39066	85.6766	3.39
		area	16	11	87.29	bin_11@87.29cM_scaffold_86259_1061	7.20171	85.6766	9.95
		ecc	16	1	22.22	bin_1@22.22cM_scaffold_40397_985	2.73428	79.7273	21.7
		ecc	16	1	90.93	bin_1@90.93cM_scaffold_10376_3074	3.49487	79.7273	31.43
		ecc	16	2	21.4	bin_2@21.4cM_scaffold_8019_6341	15.5314	79.7273	4.53
		ecc	16	2	78.4	bin_2@78.4cM_scaffold_3671_8042	7.27804	79.7273	12.37
		ecc	16	3	0	bin_3@0cM_scaffold_28740_664	2.55543	79.7273	4.56
		ecc	16	5	41.75	bin_5@41.75cM_scaffold_71631_1225	3.59097	79.7273	6.81
		ecc	16	6	45.52	bin_6@45.52cM_scaffold_51463_1551	7.39789	79.7273	4.09
		ecc	16	9	89.29	bin_9@89.29cM_scaffold_194_6347	5.81252	79.7273	1.06
		ecc	16	10	71.01	bin_10@71.01cM_scaffold_21784_3909	3.24963	79.7273	12.86
		ecc	16	11	23.86	bin_11@23.86cM_scaffold_101041_374	5.82279	79.7273	4.65
		ecc	16	11	91.56	bin_11@91.56cM_scaffold_79690_744	6.25595	79.7273	5.97
		ecc	16	12	43.51	bin_12@43.51cM_scaffold_3221_3047	6.30026	79.7273	14.76
		LW	16	1	21.92	bin_1@21.92cM_scaffold_22637_3414	2.40768	78.3802	21.35
		LW	16	1	106.91	bin_1@106.91cM_scaffold_12748_4086	3.09594	78.3802	11.79
		LW	16	2	22.53	bin_2@22.53cM_scaffold_28792_1608	13.5525	78.3802	4.45
		LW	16	2	78.4	bin_2@78.4cM_scaffold_3671_8042	6.79141	78.3802	11.62
		LW	16	5	42.43	bin_5@42.43cM_scaffold_4687_1875	2.86214	78.3802	31.47
		LW	16	6	45.52	bin_6@45.52cM_scaffold_51463_1551	6.44067	78.3802	3.13
		LW	16	9	89.29	bin_9@89.29cM_scaffold_194_6347	4.89796	78.3802	1.06
		LW	16	10	14.96	bin_10@14.96cM_scaffold_26452_1178	2.55057	78.3802	26.87
		LW	16	10	71.01	bin_10@71.01cM_scaffold_21784_3909	4.29161	78.3802	9.45
		LW	16	11	23.86	bin_11@23.86cM_scaffold_101041_374	7.29632	78.3802	6.92
		LW	16	11	91.56	bin_11@91.56cM_scaffold_79690_744	6.0372	78.3802	19.9
		LW	16	12	43.51	bin_12@43.51cM_scaffold_3221_3047	8.85602	78.3802	3.49
		pc1	16	1	32.27	bin_1@32.27cM_scaffold_8765_4335	9.07673	78.815	2.86
		pc1	16	2	52.96	bin_2@52.96cM_scaffold_58633_892	7.64915	78.815	3.35
		pc1	16	3	4.56	bin_3@4.56cM_scaffold_5310_4095	2.08665	78.815	12.89
		pc1	16	3	30.23	bin_3@30.23cM_scaffold_36500_3209	4.25208	78.815	9.62
		pc1	16	6	53.07	bin_6@53.07cM_scaffold_86629_1261	13.6049	78.815	5.78
		pc1	16	7	94.8	bin_7@94.8cM_scaffold_94520_688	2.64081	78.815	7.73
		pc1	16	8	85.2	bin_8@85.2cM_scaffold_135195_135	3.94272	78.815	16.27
		pc1	16	9	82.31	bin_9@82.31cM_scaffold_11296_2620	8.63911	78.815	4.23
		pc1	16	11	19.61	bin_11@19.61cM_scaffold_19468_3891	3.03013	78.815	19.75
		pc1	16	11	79.75	bin_11@79.75cM_scaffold_27128_4325	7.9885	78.815	7.96
		pc1	16	12	27.1	bin_12@27.1cM_scaffold_23551_1829	6.57821	78.815	5.97
		pc1	16	12	54.39	bin_12@54.39cM_scaffold_70077_1397	2.94492	78.815	5.11
		pc2	16	1	106.91	bin_1@106.91cM_scaffold_12748_4086	5.21577	84.4542	10.09
		pc2	16	2	22.53	bin_2@22.53cM_scaffold_28792_1608	11.6374	84.4542	6.45
		pc2	16	2	78.4	bin_2@78.4cM_scaffold_3671_8042	5.00908	84.4542	11.86
		pc2	16	3	85.84	bin_3@85.84cM_scaffold_4882_5968	4.5996	84.4542	11.85
		pc2	16	4	80.73	bin_4@80.73cM_scaffold_12481_3093	2.16017	84.4542	13.33
		pc2	16	5	20.63	bin_5@20.63cM_scaffold_47787_264	5.1818	84.4542	7.17
		pc2	16	6	46.16	bin_6@46.16cM_scaffold_14_22768	7.41855	84.4542	11.24
		pc2	16	9	88.8	bin_9@88.8cM_scaffold_78646_1274	8.6012	84.4542	1.92
		pc2	16	10	70.47	bin_10@70.47cM_scaffold_3376_7137	1.90831	84.4542	14.83
		pc2	16	11	27.14	bin_11@27.14cM_scaffold_70819_248	7.3629	84.4542	4.52
		pc2	16	11	75.64	bin_11@75.64cM_scaffold_28041_700	6.67916	84.4542	2.67
		pc2	16	12	38.11	bin_12@38.11cM_scaffold_26512_1632	6.311	84.4542	10.15

## Sheet: BLUP (by year)
Dataset5. BLUP by year for fruit size and shape descriptors
		Genotype	Year	len	wid	area	ecc	LW	pc1	pc2
		P67	14	3.0751	0.702443	2.30369	2.83913	3.03995	-3.16293	1.68905
		P392	16	3.04136	0.890935	2.2523	2.0999	2.06768	-1.85521	2.23447
		P150	14	2.87551	1.56208	2.57621	1.73926	1.70516	-1.68025	1.72776
		P281	16	2.78042	1.40349	2.28282	1.49915	1.58679	-0.849182	1.40818
		P175	16	2.52209	1.11353	2.00583	1.66026	1.85914	-1.66018	1.6433
		P150	15	2.5093	1.54446	2.16872	1.94633	2.01728	-2.42474	0.709611
		P103	16	2.46622	1.96126	2.48262	0.743048	0.549019	1.01859	0.504617
		P172	16	2.45397	1.86003	2.36291	1.14025	0.981779	-1.88848	1.49975
		P238	15	2.44187	1.65009	2.09326	1.79547	1.81757	-0.401965	-0.317648
		P152	15	2.43309	1.38312	2.02367	2.29768	2.22881	-0.207075	0.264915
		P387	16	2.42394	0.76615	1.81494	1.54414	1.63876	-0.362409	1.15109
		P394	16	2.415	0.547607	1.65107	1.6299	1.79179	-1.54391	1.45588
		P115	14	2.32507	1.2497	2.02058	1.50672	1.46672	-0.903617	0.297144
		P96	14	2.29175	1.43798	2.12572	1.18588	1.09419	-1.39843	1.43339
		P195	16	2.24447	1.35142	2.02516	1.09136	0.97339	0.296564	0.620304
		P276	15	2.19064	0.196287	1.23322	3.48522	3.64812	-2.9786	0.209599
		P394	14	2.17068	0.597147	1.61949	1.61507	1.64893	-2.16424	1.4405
		P328	14	2.10969	2.57624	2.61881	-0.105227	-0.117514	-0.494151	1.39219
		P172	15	2.10495	1.92063	2.10843	0.887301	1.08223	-1.0239	0.609947
		P67	15	2.09711	0.350184	1.37824	3.11631	3.27884	-3.07724	1.20403
		P452	14	2.09442	-0.621187	1.0426	2.67372	2.87015	-3.16471	0.9037
		P17	16	2.08033	0.484592	1.40691	1.79171	1.69466	-0.940454	1.54644
		P67	16	2.06998	-0.274155	0.95551	2.78374	2.98764	-1.47498	2.58809
		P289	16	2.06896	3.0586	2.92825	-1.38986	-1.22063	1.71913	-1.9225
		P211	16	2.03073	0.230427	1.25946	1.82626	1.95497	-1.68498	1.77075
		P392	14	1.98213	-0.0781822	1.13769	2.13727	2.19168	-2.85855	1.73316
		P103	14	1.93436	1.97686	2.22565	0.487972	0.436157	-0.183432	1.34131
		P218	15	1.91716	1.95037	2.11134	0.713018	0.646177	-1.9614	2.09274
		P422	14	1.91544	2.18741	2.32454	0.0894638	-0.014286	-0.562971	0.610585
		P238	14	1.88372	0.621016	1.3838	1.99978	2.00887	-1.27817	2.31149
		P126	15	1.85736	1.56526	1.7857	0.990747	0.971765	-0.104057	-0.95787
		P92	15	1.84767	0.935736	1.42908	1.91476	1.8622	-1.86817	2.84068
		P207	14	1.8392	1.40025	1.91626	1.10981	0.919529	-1.3731	2.63103
		P110	14	1.83496	2.13805	2.18541	0.302592	0.342795	-0.188444	-0.286064
		P78	14	1.82869	1.14409	1.7479	0.948573	0.882479	-0.53943	0.528844
		P363	14	1.81843	1.16977	1.66928	1.11671	0.92294	-0.546055	0.00350543
		P126	16	1.8138	0.553586	1.30169	1.02712	1.03843	-1.33484	1.22486
		P129	14	1.77946	0.643033	1.42762	1.26348	1.37066	-2.38719	1.59366
		P80	15	1.77582	0.366767	1.13439	2.18153	2.03475	-3.13843	2.46091
		P258	14	1.77529	1.95326	2.06026	-0.136686	-0.0453797	-0.282817	-0.35097
		P308	15	1.76566	0.743132	1.3415	1.55161	1.57133	-0.543259	-0.650405
		P175	15	1.75601	1.42196	1.71964	1.23874	1.24957	-1.23887	0.593298
		P299	15	1.75337	2.09256	2.0245	0.0857433	-0.0267372	-0.0668763	0.753042
		P78	16	1.74643	0.960657	1.48097	1.00923	1.02746	0.313986	0.124751
		P198	15	1.74223	1.53093	1.7919	0.72886	0.763293	-1.32767	0.665939
		P281	15	1.7041	0.78779	1.47855	1.49128	1.63188	-0.271514	-0.116948
		P57	15	1.69551	1.51956	1.64745	0.923022	0.792733	-1.46567	2.28168
		P126	14	1.69124	0.628251	1.37547	1.23626	1.1458	-0.604894	0.432742
		P141	14	1.68853	-0.224679	1.00136	2.02391	2.19675	-2.5359	1.17364
		P415	15	1.68136	1.26712	1.58644	1.05144	0.907436	-0.629972	1.25279
		P78	15	1.67414	1.65548	1.71471	0.392415	0.420875	-0.472284	0.707118
		P233	15	1.67374	1.50672	1.56279	0.844848	0.898072	0.124696	-1.08009
		P63	14	1.67027	0.501393	1.22247	1.33453	1.25279	-0.564463	-0.559417
		P429	14	1.67011	0.00150704	1.01419	1.77596	1.85313	-1.14891	-0.170466
		P20	16	1.66966	2.24652	2.25762	-0.933181	-0.817386	-0.850269	-0.571813
		P308	14	1.65083	0.189129	1.1207	1.76519	1.76096	-0.368216	-0.519415
		P12	14	1.64885	0.906114	1.4005	1.0784	1.03769	-0.534215	0.460072
		P211	14	1.64622	0.744921	1.48394	1.16791	1.13758	-0.76047	0.221286
		P409	16	1.64052	1.55388	1.78403	-0.095036	-0.239236	-0.375475	0.349682
		P276	16	1.6346	-0.833071	0.304147	3.06119	3.35527	-0.936371	1.58301
		P383	15	1.62511	1.19212	1.55983	1.11284	1.05263	-2.16862	2.31539
		P88	14	1.62269	0.329736	1.19961	1.49595	1.53359	-2.25805	1.753
		P148	15	1.60988	2.44091	2.12726	-0.817	-0.848955	0.288269	0.861269
		P141	16	1.5936	-0.0260425	0.813038	1.73974	1.67381	-3.03447	2.24712
		P365	15	1.59183	2.07916	1.93879	-0.168114	0.0169921	-0.941124	0.674104
		P352	14	1.5835	0.342126	1.05379	1.40839	1.35225	-1.74906	1.45123
		P19	16	1.57997	0.723596	1.28021	1.34395	1.2815	-1.2145	0.953417
		P452	15	1.57916	0.0710615	0.944953	2.32306	2.7407	-3.00108	0.226135
		P299	16	1.56544	2.32914	2.14753	-0.790855	-0.80189	0.637419	-0.956343
		P402	14	1.56105	1.03269	1.50964	0.662555	0.600824	-0.984763	1.91745
		P96	16	1.55532	0.571927	1.16405	1.04732	0.863901	-1.42244	0.930762
		P4	15	1.55342	1.81125	1.71258	-0.0618605	-0.0172202	-0.398949	-0.215432
		P18	16	1.5486	0.686906	1.24703	0.97507	1.0939	-2.28889	1.53887
		P157	15	1.54805	1.67711	1.60093	0.287688	0.325462	-0.027468	-0.225986
		P179	16	1.5312	1.11241	1.47325	0.258433	0.196847	0.17698	0.284929
		P139	16	1.53011	0.891003	1.32013	0.754972	0.668275	1.10566	0.620762
		P31	15	1.50915	1.73065	1.83177	-0.139992	-0.0661879	-1.28797	0.505413
		P48	15	1.50722	0.19293	1.01934	2.36564	2.32028	-2.49272	2.63549
		P263	15	1.50363	0.0840448	0.863722	2.34269	2.3405	-1.77898	1.7661
		P95	15	1.48765	0.576068	1.0281	1.12185	1.25124	-1.01624	-0.039429
		P281	14	1.47058	0.737933	1.39786	1.05945	1.01841	-0.283236	0.429889
		P276	14	1.45871	-0.887452	0.356492	2.64056	2.80699	-1.30725	0.662724
		P157	14	1.44911	1.04032	1.44888	0.528562	0.646338	-1.49198	2.38801
		P75	15	1.44682	0.785849	1.28818	1.05201	1.26483	-1.53009	1.08454
		P389	16	1.43471	1.07446	1.47554	0.0539459	0.0662286	0.695109	0.139663
		P339	16	1.43261	1.64888	1.65906	-0.290005	-0.394812	0.47003	-0.0873529
		P347	16	1.43213	0.533419	1.11973	0.88107	0.844901	0.0733828	0.0431245
		P422	15	1.42927	1.53662	1.55589	0.25395	0.256526	-0.267128	0.100535
		P93	14	1.42817	1.15988	1.47484	0.621507	0.517588	-0.272121	0.987639
		P157	16	1.42401	0.829239	1.23359	0.503737	0.474921	-0.999182	0.742501
		P119	14	1.42144	2.04184	1.96691	-0.46614	-0.402656	0.263614	-0.113892
		P266	15	1.4146	2.13942	1.76599	-0.70585	-0.556396	0.584296	-1.12171
		P175	14	1.40748	0.960387	1.39272	0.717089	0.785783	-0.93906	-1.0393
		P268	16	1.39461	0.316993	0.958357	1.60419	1.56637	-0.546878	0.996824
		P302	15	1.39203	2.29073	1.93569	-0.580385	-0.603213	-0.540732	-0.403307
		P153	16	1.39082	1.09906	1.37774	0.46242	0.371095	-1.20817	0.843267
		P180	14	1.37223	0.125858	0.861294	1.34811	1.49855	-1.1544	0.0258917
		P110	16	1.35901	1.71908	1.71807	-0.438754	-0.348553	0.0929818	-0.879864
		P229	15	1.32631	0.123474	0.724012	2.38345	2.39747	-1.30918	-0.126809
		P264	16	1.32328	1.32607	1.50738	-0.0764083	-0.109589	-0.0170705	-0.5947
		P237	15	1.32003	1.64711	1.50478	0.0181042	-0.0335099	0.781715	-0.403979
		P96	15	1.3108	0.934216	1.22566	0.669953	0.599917	1.10246	-0.309487
		P200	15	1.30809	0.948284	1.29108	0.798931	0.619821	-0.669711	1.07116
		P172	14	1.30694	1.18432	1.48484	0.451992	0.506394	-0.692897	0.42016
		P152	16	1.29516	0.517668	0.946449	1.06919	1.01365	-0.445401	1.36248
		P218	16	1.29354	1.28791	1.45885	-0.104145	-0.0336097	0.147766	-0.126417
		P19	14	1.28991	0.842531	1.27025	0.667389	0.677451	-1.10417	1.33213
		P129	16	1.28618	0.945314	1.28276	0.154069	-0.0304913	-2.19292	1.11973
		P94	16	1.24945	1.68436	1.60485	-0.32141	-0.482306	0.545025	-0.417999
		P402	16	1.24859	0.591353	1.03358	0.712248	0.509715	1.47743	0.410233
		P347	15	1.24649	0.9482	1.19383	0.522637	0.454312	-0.463116	0.938265
		P191	16	1.24576	2.49684	2.12268	-1.32977	-1.30459	1.74287	-2.1565
		P452	16	1.24162	-0.729018	0.282836	2.04407	2.17055	-1.30027	1.31639
		P383	14	1.24162	1.24608	1.44604	0.165924	0.1837	-0.0657831	-0.890856
		P20	15	1.2226	1.95317	1.6989	-0.622619	-0.615111	0.0640797	1.19421
		P342	16	1.21759	0.703047	1.04563	0.615227	0.42667	0.0907976	0.583536
		P268	14	1.21759	0.819622	1.11446	0.790412	0.770399	0.075073	-0.0856955
		P4	16	1.21498	0.78099	1.05899	0.802894	0.574056	1.12714	0.727069
		P275	15	1.21474	1.87951	1.62923	-0.669961	-0.485862	-0.250954	-0.262628
		P219	14	1.21332	-0.204297	0.590263	1.49142	1.6002	-1.15672	0.599476
		P258	16	1.2125	1.19033	1.2952	-0.470202	-0.404633	0.145417	-0.232019
		P347	14	1.21115	0.584264	1.02872	0.481256	0.444662	-0.594827	0.746096
		P192	15	1.19237	0.583541	0.900286	0.987581	0.974802	0.0862426	-0.690034
		P429	15	1.19084	0.146256	0.731035	1.88874	2.09311	-2.1449	0.177483
		P207	15	1.1812	0.823078	1.18643	0.895915	0.9386	0.352621	-1.45806
		P342	14	1.18037	1.37263	1.36801	-0.0661733	-0.124348	0.555686	-0.0893284
		P184	14	1.17953	-0.855177	0.180491	2.17032	2.17091	-1.46218	1.14027
		P121	16	1.17472	1.76587	1.74736	-0.86912	-0.870126	0.642835	-0.313452
		P447	16	1.16966	1.3158	1.31116	-0.0345334	-0.0585511	1.06882	-0.64843
		P324	14	1.16423	-0.35159	0.515155	1.54843	1.60241	-0.891546	-1.41127
		P121	15	1.16339	1.74199	1.62551	-0.584746	-0.610232	-0.80583	2.20126
		P238	16	1.15959	-0.251594	0.458351	1.67816	1.75962	-0.721554	1.32966
		P103	15	1.15421	0.949742	1.0801	0.688306	0.649915	-0.783687	1.11666
		P428	14	1.15094	0.625347	0.987984	0.254906	0.230716	-0.309513	1.16252
		P4	14	1.14547	1.33933	1.41835	0.338985	0.283651	0.0614982	0.77504
		P46	14	1.13562	-0.000694663	0.741938	0.90116	0.940586	-1.43566	-0.894102
		P91	14	1.13275	0.591451	1.01478	0.822652	0.836369	-0.279918	-0.109112
		P168	14	1.12671	0.514161	0.928351	0.526027	0.483246	-0.518988	0.730387
		P93	16	1.11967	-0.0922331	0.560732	1.53191	1.44488	-0.749231	0.857503
		P48	14	1.11772	-0.375234	0.49436	1.63126	1.55628	-1.27916	0.198421
		P245	16	1.09803	-0.21407	0.482614	1.80723	1.61811	-1.32823	1.50963
		P198	14	1.06684	0.705378	1.07429	0.673338	0.700976	-1.04472	1.18882
		P436	14	1.06286	1.33194	1.4067	-0.431477	-0.429289	-0.0156718	0.890441
		P106	16	1.06211	0.894305	1.04211	0.250445	0.114675	-0.921159	1.10696
		P63	15	1.06123	0.194248	0.709089	1.14018	1.18202	-1.08114	-0.0646666
		P55	16	1.05859	2.11057	1.78392	-1.23491	-1.17012	0.988396	-1.26857
		P398	14	1.05691	-0.0860049	0.619442	1.08471	0.985086	-1.12356	0.688662
		P339	15	1.05367	1.63572	1.45025	-0.553139	-0.644391	-0.0068808	-0.245999
		P92	16	1.05135	0.193563	0.699574	0.935224	0.937056	-1.08634	0.794546
		P374	15	1.0504	1.82604	1.48109	-0.899261	-0.806235	-0.13252	1.195
		P438	16	1.04963	0.175754	0.622663	0.90169	0.976976	-0.725902	0.768655
		P113	16	1.04951	2.37986	1.9266	-1.23018	-1.47495	1.6757	-1.2611
		P150	16	1.0437	0.0615655	0.573318	1.0918	0.926227	-1.14643	1.77114
		P340	14	1.04266	0.969474	1.18446	0.327069	0.275343	-0.744691	1.31714
		P365	16	1.03907	0.881251	1.02785	0.136273	0.251795	0.309382	-0.321885
		P391	16	1.03606	2.13392	1.78837	-1.51713	-1.34776	0.701966	-1.04901
		P106	15	1.03363	1.16388	1.10958	0.479063	0.239599	0.0754179	0.484402
		P91	16	1.02827	0.310052	0.733991	0.792329	0.855916	-0.864754	-0.0675498
		P373	15	1.02481	0.098152	0.568202	1.27813	1.46049	0.363669	-2.71479
		P223	16	1.02047	1.8743	1.63961	-1.04554	-1.12153	1.22093	-1.00576
		P383	16	1.01954	0.294493	0.671661	1.12468	1.0783	-0.693476	0.950749
		P10	14	1.01393	0.316845	0.761044	0.641158	0.60516	-0.373385	0.190628
		P127	15	1.00852	0.830768	0.930328	0.590514	0.40906	0.788138	-0.253781
		P233	14	0.999484	0.603708	0.924167	0.686819	0.860065	-0.286542	-1.49205
		P413	16	0.999117	0.861091	1.05048	-0.148556	-0.204234	-1.44002	0.696536
		P289	14	0.995579	2.69428	2.0672	-1.50952	-1.44803	1.37567	-1.26459
		P115	15	0.992021	0.103719	0.667696	1.16125	1.2222	-1.33805	-0.209884
		P258	15	0.986922	0.583657	0.771203	0.446134	0.499116	-0.733838	0.976671
		P389	14	0.981198	1.59365	1.44464	-0.821819	-0.648423	-0.048957	0.199348
		P415	16	0.977345	0.849297	1.01185	0.10209	0.0834474	0.833777	-0.204844
		P409	14	0.97134	1.34319	1.34724	-0.434861	-0.348219	-0.258724	0.159925
		P209	15	0.969221	0.777591	1.01854	0.242627	0.208065	-0.265912	0.43097
		P355	16	0.968698	0.813356	0.988521	0.350106	0.261621	-1.01104	0.967656
		P380	14	0.966719	-0.22429	0.512277	1.15714	1.20764	-0.658371	-0.587349
		P253	15	0.964793	1.54919	1.32502	-0.406924	-0.541977	0.110259	1.13409
		P31	14	0.964307	1.60277	1.43361	-0.332028	-0.459718	0.444144	0.336274
		P19	15	0.957442	1.02129	1.02835	0.34085	0.338612	-0.98236	1.91716
		P197	15	0.951572	0.307485	0.627132	0.890206	0.969537	-0.780499	-0.349619
		P17	14	0.94932	-0.186358	0.464204	1.36883	1.32798	-1.3075	1.63353
		P299	14	0.94097	1.76651	1.43963	-0.241971	-0.301845	0.524315	0.886682
		P455	16	0.936745	1.00534	1.11434	-0.100211	-0.0885199	0.959166	-0.619389
		P324	15	0.932729	-0.0257005	0.438974	1.32621	1.59113	-1.8974	0.788427
		P373	14	0.924424	-0.809553	0.0846406	1.74295	1.63219	-1.44766	0.995923
		P275	14	0.918618	1.5188	1.37699	-0.425251	-0.410966	0.639023	-0.917338
		P282	14	0.913325	-0.0694974	0.553345	1.37264	1.32862	-0.625741	-1.28549
		P326	15	0.912632	0.570635	0.776676	0.85736	0.591884	-0.555965	2.34512
		P245	14	0.909835	-0.557821	0.16137	1.91149	2.00561	-1.63449	1.25177
		P275	16	0.909047	1.22052	1.23725	-0.57244	-0.464568	0.540635	-0.69929
		P133	15	0.904234	1.21562	1.24941	-0.282631	-0.389554	1.9428	-0.472154
		P200	14	0.899119	0.20467	0.646359	0.875354	0.787739	0.556714	-1.62756
		P219	16	0.898628	-0.244801	0.377795	1.54019	1.31297	-0.314636	0.927075
		P224	14	0.896947	0.200445	0.545446	0.565043	0.537789	-0.640174	0.0490532
		P367	14	0.89154	0.718889	0.990265	0.235855	0.146141	0.214694	1.30625
		P253	16	0.877666	1.11832	1.12147	-0.2197	-0.31801	-0.553697	0.118319
		P302	16	0.873357	1.35769	1.27901	-0.0299064	-0.129985	-0.0223981	-0.492819
		P184	16	0.869393	-1.01698	-0.119795	1.84403	1.92484	-1.35097	1.61501
		P219	15	0.862886	-0.357841	0.282304	1.95282	1.85979	-2.50807	1.88853
		P80	14	0.857703	-0.967916	-0.0523606	1.83744	1.74867	-1.07621	-0.483221
		P427	16	0.85155	1.22096	1.17964	-0.891794	-0.801718	-0.196252	-1.02248
		P9	14	0.846157	2.06764	1.56845	-1.18642	-1.17995	1.25564	-1.03904
		P356	15	0.844706	1.33779	1.07674	-0.393519	-0.481309	0.128305	0.359018
		P199	16	0.844598	1.65583	1.41829	-1.05892	-1.02902	0.891293	-1.27428
		P243	16	0.842716	1.05822	1.05722	-0.246305	-0.25073	0.85961	-0.46005
		P340	16	0.841921	0.276307	0.591766	0.875034	0.80538	-0.609068	0.502951
		P363	16	0.838159	0.657251	0.819417	0.198349	0.0951851	0.361587	0.528111
		P118	15	0.837811	1.20667	0.977548	-0.602441	-0.591635	0.607874	-0.255226
		P360	14	0.827386	0.769595	0.848085	-0.0870761	-0.0373748	-0.47249	0.541962
		P409	15	0.825583	0.917919	1.08683	-0.0697046	-0.0254085	-0.919122	-0.0371335
		P185	14	0.824388	0.243245	0.662608	0.447427	0.310994	0.429837	-0.419673
		P49	15	0.822655	0.714479	0.878845	0.559695	0.554739	1.14754	-0.149485
		P10	16	0.821385	-0.623584	0.119321	1.3935	1.42066	0.244395	1.08889
		P159	15	0.820282	0.768107	0.758969	0.347908	0.323843	0.530121	-0.667078
		P353	15	0.818947	0.773679	0.935186	0.709008	0.51543	-0.883335	2.52046
		P380	16	0.810656	0.163484	0.593009	0.624021	0.603307	-1.01453	0.868764
		P406	16	0.805032	1.06408	1.0564	-0.381673	-0.521721	0.518087	-0.894455
		P88	15	0.804989	-0.0705793	0.431769	1.48021	1.66717	-2.25075	0.251721
		P125	14	0.80059	0.705753	0.792824	0.11852	0.0279499	0.103184	0.603991
		P338	16	0.800183	0.959672	1.0238	-0.265701	-0.219249	-0.118707	-0.506295
		P48	16	0.798648	-0.646247	0.121012	1.62046	1.56858	0.346181	1.39461
		P94	15	0.796632	1.14746	0.965414	0.164308	0.0644564	0.829802	0.631128
		P191	14	0.795915	2.79752	1.99446	-1.79534	-1.69866	1.56718	-0.109446
		P20	14	0.783748	1.22013	1.1787	-0.261208	-0.328131	0.500214	-1.79167
		P240	16	0.781008	1.49485	1.30755	-0.823461	-0.670889	0.43828	-0.209528
		P129	15	0.780366	0.157321	0.453827	1.07216	1.01234	-1.08791	0.986245
		P119	15	0.774592	1.0349	0.960442	-0.395954	-0.360065	0.629271	-0.0615159
		P205	15	0.773308	0.246235	0.425774	1.09597	0.943079	-0.607487	1.6294
		P28	14	0.771124	-1.11458	-0.218786	2.10055	2.14135	-1.04596	-0.58899
		P133	16	0.770027	1.67669	1.32079	-1.17027	-1.09372	0.693747	-1.14304
		P260	16	0.767259	-1.48093	-0.416409	2.6165	2.66732	-0.979325	2.32446
		P212	16	0.765542	-0.0661808	0.374931	1.25018	1.2344	-2.8465	2.00646
		P225	14	0.765542	0.823824	0.938556	-0.0395765	-0.106432	0.633109	-0.544095
		P28	15	0.765161	-0.379502	0.192089	1.62218	1.51044	0.419019	-0.373107
		P263	16	0.762633	-1.02121	-0.120013	2.17283	2.10119	-0.269988	2.40805
		P365	14	0.749119	0.888847	0.976549	0.326449	0.120299	1.08045	-0.62049
		P195	14	0.747454	0.687016	0.727212	0.175413	0.122052	0.383417	0.494824
		P245	15	0.746955	-0.50492	0.0485274	2.06805	2.04183	-0.557456	0.22126
		P59	14	0.74222	0.277275	0.652114	0.498465	0.541478	-0.373554	0.59992
		P200	16	0.736972	-0.511599	0.150343	1.40909	1.33672	-1.18269	1.2907
		P115	16	0.731333	-0.638468	-0.0198263	1.5233	1.56256	-0.188689	0.847733
		P77	14	0.726378	-0.556111	0.118141	1.20612	1.22676	-0.484549	-1.10173
		P436	16	0.723443	0.253488	0.553112	-0.130773	0.12195	-1.30252	0.418704
		P18	15	0.719334	0.28149	0.499815	1.11063	1.11894	-1.07998	0.790707
		P450	16	0.717437	0.474736	0.69766	0.203411	0.0560361	-0.898893	0.664538
		P100	15	0.713617	1.11459	0.905372	0.112894	-0.0862446	0.220587	1.05858
		P328	15	0.713326	1.23096	0.979906	-0.43715	-0.4262	-0.131226	-0.579291
		P413	14	0.711578	0.655789	0.747062	0.0211702	-0.0307364	0.335439	0.761204
		P95	14	0.710534	-0.865278	0.0339273	1.44064	1.51381	-0.419504	-1.46103
		P104	14	0.705023	-0.144331	0.295063	0.917684	1.1097	-1.37277	1.07053
		P277	14	0.704627	0.0627925	0.494567	0.600992	0.627455	-1.44518	1.34728
		P109	14	0.699446	-0.14955	0.291268	0.927277	1.1193	-1.38322	1.1091
		P218	14	0.697061	0.752462	0.884007	0.253634	0.248338	-0.629418	2.23556
		P429	16	0.68821	-0.994153	-0.177405	1.92848	1.89075	-1.01073	2.11966
		P309	14	0.688097	1.10489	0.993341	-0.83141	-0.720904	0.119777	-0.331305
		P239	14	0.684917	1.04524	0.972792	-0.394807	-0.446858	-0.00727308	1.38586
		P448	15	0.683145	-0.0398962	0.419072	1.25488	1.18459	0.133141	-0.468641
		P352	15	0.682784	0.256209	0.500581	0.702868	0.619651	-0.135763	-0.218551
		P428	16	0.681638	0.460571	0.626858	-0.259245	-0.320134	-0.648241	0.370418
		P324	16	0.677438	-1.38779	-0.436424	2.40177	2.67051	-1.57445	1.65695
		P407	14	0.6732	-0.495469	0.111486	1.27244	1.25924	-1.4208	-0.380957
		P415	14	0.671888	-0.250442	0.317224	0.935452	0.954255	-1.0533	-0.985493
		P185	16	0.670376	-0.290076	0.212935	0.362694	0.558862	0.433662	-0.363083
		P179	15	0.663766	0.528367	0.637438	0.068936	0.0929278	-0.309139	0.833483
		P438	14	0.66166	0.408784	0.692834	0.275842	0.187307	0.343716	-1.17802
		P241	15	0.655631	0.878564	0.727068	0.334172	0.346151	-0.158618	-1.12144
		P363	15	0.654921	0.61066	0.670173	0.335007	0.208862	0.231735	-0.0465316
		P79	14	0.650943	1.20152	1.04347	-0.212003	-0.243353	0.532346	0.404779
		P268	15	0.646679	0.810426	0.686042	0.0926595	-0.0758881	0.650692	-0.242775
		P284	14	0.643446	1.4797	1.15399	-0.68247	-0.912735	0.872769	0.276685
		P360	16	0.643439	0.121252	0.440819	0.272281	0.32326	0.178036	0.222146
		P345	16	0.641303	0.498225	0.679267	0.223432	0.217069	-0.513109	0.160349
		P212	14	0.632404	0.132681	0.492435	0.896997	0.862289	-0.599591	0.381532
		P259	14	0.608768	0.0254929	0.41191	0.719515	0.748838	-0.0306374	0.684916
		P16	15	0.600092	0.587059	0.674521	0.370586	0.335116	-0.390916	1.42367
		P270	14	0.599169	-0.253274	0.169148	1.11984	1.16654	-0.581593	-0.9413
		P125	15	0.594746	0.330729	0.457875	0.231315	0.150293	-0.228981	1.14495
		P180	16	0.594529	-0.810803	-0.14192	1.37255	1.50466	-1.78381	1.49985
		P95	16	0.58882	-0.687441	-0.129213	1.32746	1.38832	-2.2162	1.41673
		P421	14	0.586062	0.0299149	0.345982	0.95716	0.956799	-0.449414	0.673361
		P195	15	0.585836	0.683291	0.658943	-0.122465	-0.0247201	0.691533	-1.74084
		P314	15	0.583894	-0.259103	0.14963	1.06186	1.20934	-0.264676	-0.0557889
		P367	15	0.581056	1.00396	0.827782	-0.423473	-0.412101	0.235844	-0.0993377
		P106	14	0.576931	1.30266	0.981904	-0.652855	-0.467144	0.871286	-0.579461
		P153	15	0.569878	0.798935	0.715865	0.0991283	-0.111319	-0.608497	1.27708
		P49	14	0.567948	0.761939	0.800329	-0.296215	-0.295707	0.232727	-0.0108378
		P18	14	0.565122	-0.330659	0.133018	1.23135	1.26475	-0.837584	-0.485411
		P152	14	0.564731	-0.266399	0.16395	1.11319	1.06686	-0.850103	1.33312
		P263	14	0.555439	-1.66774	-0.471816	2.05099	2.14821	-2.66136	1.97466
		P91	15	0.554214	0.178229	0.41928	0.729502	0.703079	-0.741527	0.301585
		P311	15	0.549318	1.18346	0.833607	-0.933429	-0.789058	1.15586	-0.911511
		P135	14	0.543768	1.47684	1.18208	-0.67607	-0.768	0.114239	-0.637174
		P387	15	0.537241	-0.258914	0.236786	1.3195	1.29404	-2.14264	0.478241
		P237	16	0.536664	0.314402	0.440739	0.395046	0.326751	-0.184012	0.227992
		P379	16	0.536061	1.33366	1.0541	-0.913718	-0.773598	0.0690874	-1.2995
		P326	14	0.530065	0.33948	0.514897	0.189743	0.227688	-0.407525	-0.0685189
		P450	14	0.529521	0.280628	0.557974	0.0597285	0.0433487	-0.840792	0.46285
		P135	15	0.528675	1.22899	0.897699	-0.534394	-0.591557	-0.631321	0.948099
		P75	16	0.528056	0.0521273	0.362018	0.822597	0.746772	1.21602	-0.0525386
		P257	15	0.525473	0.539815	0.604544	0.229173	0.250439	0.20789	0.959474
		P395	16	0.521533	0.820626	0.772359	0.359292	0.285714	-0.42877	-0.193333
		P148	16	0.520068	1.58171	1.2258	-1.07573	-1.1324	0.268954	-0.470888
		P248	15	0.519225	0.00840839	0.221519	0.482271	0.586693	0.653619	0.00119909
		P427	14	0.512698	0.454347	0.594515	-0.188481	-0.0915462	-0.37137	-0.190441
		P168	15	0.508752	0.0687934	0.239792	0.616222	0.490522	0.495283	-0.628031
		P289	15	0.508077	1.74845	1.19218	-1.72564	-1.50139	1.05056	-0.806266
		P14	16	0.506843	1.24982	1.00991	-0.695525	-0.657152	0.659651	-0.783436
		P221	15	0.506512	-0.355292	0.153278	1.71013	1.49305	-0.799375	1.33821
		P393	14	0.502033	-0.140153	0.279137	0.629804	0.550179	-0.687771	0.074148
		P12	16	0.498558	-0.500224	0.0488748	0.922336	0.9743	-0.827282	0.936061
		P139	14	0.496474	-0.296613	0.114653	1.13757	1.07205	-0.797644	0.946349
		P425	14	0.492803	-0.553064	-0.032462	0.905142	0.880812	-1.12823	-0.68244
		P118	14	0.492554	1.24449	0.96185	-0.68367	-0.683184	1.01119	-0.558808
		P182	15	0.492163	0.850043	0.699721	-0.627178	-0.610459	-0.978227	2.10074
		P449	15	0.482483	0.526201	0.585796	0.0227989	0.083205	-0.334191	0.316042
		P60	16	0.482106	0.893213	0.795679	-0.450717	-0.4108	0.887919	-0.783782
		P57	14	0.48008	0.487106	0.500555	0.0121121	0.00440064	0.00827173	0.62704
		P433	14	0.470443	0.0728566	0.302353	0.193715	0.14974	-0.448464	0.809426
		P208	14	0.470202	0.395734	0.473999	0.0971527	0.00843259	-0.0291	0.089845
		P246	16	0.465912	0.365975	0.465899	0.183424	0.166756	0.320741	0.255931
		P178	14	0.460005	-0.973388	-0.290867	1.43946	1.56435	-2.37058	0.891719
		P282	15	0.449069	-0.300396	0.112521	1.10673	1.07333	1.01304	-1.10902
		P234	15	0.440603	0.18748	0.29706	0.634929	0.601811	-0.0116004	-0.290598
		P135	16	0.439661	0.962674	0.818852	-0.286932	-0.495739	-0.0376276	-0.710074
		P387	14	0.434275	-1.34269	-0.390537	1.56736	1.6959	-1.30397	-0.414108
		P223	15	0.430667	1.3406	1.03521	-1.66597	-1.48185	0.704575	-1.14805
		P202	15	0.425452	0.800564	0.629807	-0.357759	-0.409236	0.336708	-0.423728
		P183	15	0.418457	0.874192	0.669946	-0.448251	-0.280378	-0.800971	-0.629375
		P59	15	0.409816	-0.31555	0.125729	1.02015	1.08742	-0.608291	-0.237821
		P104	15	0.407798	0.15513	0.252436	0.748749	0.644221	-1.00652	0.799882
		P73	14	0.405001	0.662698	0.686542	0.0380274	-0.116886	-0.0372014	1.39808
		P353	14	0.403988	0.755271	0.759042	0.0322139	-0.0920547	1.27241	-0.696831
		P109	15	0.401644	0.149742	0.248527	0.751199	0.646086	-1.02935	0.810003
		P248	14	0.398589	-0.567356	-0.0844239	0.9862	0.877287	-1.01468	0.935528
		P442	16	0.398374	0.0226338	0.234841	0.317609	0.328633	-0.303651	0.512148
		P241	14	0.396294	0.991335	0.707845	-0.202311	-0.204138	0.408754	-0.0287967
		P22	15	0.395892	0.629237	0.594207	-0.255413	-0.250676	-0.772381	2.17616
		P342	15	0.39226	0.492647	0.384457	-0.0567838	-0.350269	0.52388	-0.31731
		P270	15	0.390896	-0.540201	-0.0733024	1.48468	1.49401	-2.60641	2.31325
		P243	15	0.381623	0.380559	0.375469	0.370136	0.308202	-0.454853	0.429379
		P180	15	0.378795	-0.492929	0.00782669	1.29592	1.18473	-0.905204	0.870346
		P74	14	0.375392	0.557453	0.43462	-0.319962	-0.231867	-0.416708	-0.441379
		P98	16	0.372	-0.859556	-0.289854	1.84025	1.72227	-0.820755	1.41342
		P232	14	0.369353	-0.680814	-0.190151	1.33333	1.31547	-0.545217	0.334386
		P196	14	0.369288	-0.684173	-0.102875	1.27661	1.14173	0.360341	-1.10951
		P127	16	0.364692	-0.095634	0.0509237	0.54655	0.628781	-1.48796	0.856722
		P7	16	0.363959	0.646714	0.59511	-0.0835206	-0.252662	-0.538343	0.0427807
		P339	14	0.360876	0.705012	0.682942	-0.26676	-0.201072	0.132324	0.761669
		P226	16	0.355369	1.30511	0.910335	-0.874604	-0.926432	1.8795	-1.04432
		P201	16	0.35462	0.450772	0.460033	-0.00904765	0.0540982	0.636801	-0.609482
		P64	16	0.354461	-1.00472	-0.325817	1.66181	1.6419	-2.6327	2.04124
		P294	15	0.351662	0.508227	0.345145	-0.257707	-0.27939	0.480197	0.338386
		P341	14	0.351658	0.104342	0.284059	0.0975517	0.22234	-0.671686	-0.802141
		P302	14	0.351505	1.53609	1.00365	-0.620418	-0.644038	0.41151	0.526034
		P344	15	0.350664	1.33497	0.915152	-1.12707	-1.09688	-0.197309	-0.189364
		P118	16	0.348388	0.70105	0.545807	-0.540087	-0.3892	-0.158609	-0.438084
		P359	16	0.34735	0.957818	0.764391	-0.824867	-0.752327	0.790543	-0.319357
		P154	15	0.346982	0.779734	0.536693	-0.463155	-0.487764	0.208767	0.194838
		P55	14	0.335485	1.75292	1.07952	-1.24075	-1.24781	1.47771	-0.723928
		P15	14	0.334731	-0.011501	0.185017	0.348763	0.301013	0.335733	-1.27291
		P73	16	0.332324	0.461827	0.474141	-0.187668	-0.295818	0.333681	-0.208853
		P43	15	0.332322	0.768722	0.518296	-0.61735	-0.435277	1.3283	-1.34289
		P253	14	0.331429	1.1561	0.733552	-0.658618	-0.733623	1.29824	-0.282019
		P22	14	0.327341	0.848153	0.75903	-0.752615	-0.776991	1.40763	-1.77343
		P398	16	0.326828	-0.983186	-0.353458	1.37534	1.24731	0.196717	0.955434
		P223	14	0.32631	2.09656	1.36239	-1.66229	-1.70723	1.63992	-0.0680458
		P217	14	0.324745	-0.679771	-0.193126	1.10535	1.2054	-0.972517	0.135851
		P334	15	0.319606	1.26314	0.867132	-1.046	-0.983578	-0.227894	-0.279172
		P112	16	0.318833	1.66512	1.1086	-1.47021	-1.4115	0.588951	-1.50671
		P119	16	0.317599	0.688081	0.630151	-0.974532	-0.89417	1.85889	-0.988008
		P183	16	0.311685	0.991684	0.749712	-0.908396	-0.870191	-0.400914	-0.476341
		P295	15	0.308373	0.70102	0.494831	-0.411663	-0.345991	0.712624	0.281169
		P353	16	0.306205	0.491138	0.466001	0.115681	0.0328974	-0.044237	0.0736917
		P447	15	0.304071	0.604099	0.552416	-0.206013	-0.12571	-0.310802	-0.543809
		P301	16	0.303384	1.04846	0.755391	-0.82931	-0.925781	0.707812	-0.59688
		P233	16	0.302907	-0.0845231	0.0356401	0.625464	0.616044	-0.21892	0.42609
		P422	16	0.298881	0.171991	0.266707	0.126689	-0.0321026	0.46901	-0.312007
		P241	16	0.294153	0.439656	0.392205	0.260864	0.20304	0.536876	-0.446789
		P256	15	0.293283	0.170802	0.307777	0.0144753	0.127254	1.41885	-0.629391
		P306	16	0.288774	-1.01382	-0.432524	1.7942	1.60103	0.302371	1.61573
		P92	14	0.288255	-0.982149	-0.380207	1.27784	1.48769	-1.84853	-0.415485
		P74	16	0.287323	0.391392	0.40771	-0.349268	-0.183114	-0.874859	-0.0416765
		P246	15	0.287263	-0.0704933	0.084364	0.954653	0.543003	-0.331677	0.871311
		P80	16	0.286448	-1.19096	-0.559597	1.34309	1.40189	-0.26848	1.11391
		P369	14	0.284699	0.781751	0.504999	-0.422575	-0.393185	0.260495	-0.0170527
		P45	15	0.280264	0.692967	0.466291	-0.487665	-0.459208	0.562922	-0.647858
		P184	15	0.28011	-1.00941	-0.268259	1.94411	1.8427	-1.18717	0.870787
		P30	15	0.278301	0.285919	0.337122	-0.100914	0.108716	-0.0745864	-0.821249
		P207	16	0.272666	-0.478812	-0.0733824	0.995257	0.987173	0.481694	0.438787
		P68	14	0.269049	-0.232218	0.0114052	0.374087	0.370564	-0.116684	-0.281782
		P264	15	0.268787	0.385012	0.397624	-0.0382847	-0.180713	-0.253096	0.560247
		P55	15	0.267749	1.0847	0.691635	-1.02082	-1.08858	0.735205	0.845178
		P84	15	0.263742	0.545042	0.41229	-0.53326	-0.414351	-0.0289466	0.584575
		P197	16	0.263521	-0.689957	-0.282765	1.12898	1.20273	0.144949	0.574074
		P435	14	0.260074	-0.482055	-0.0454032	0.505001	0.493246	-1.06275	1.7616
		P68	15	0.258663	-0.0795025	0.0906422	0.331393	0.432795	0.0702018	-0.595459
		P155	16	0.256115	0.850696	0.62995	-0.557292	-0.562852	0.739501	-0.253213
		P296	14	0.254121	0.153985	0.239831	0.261766	0.246913	-0.45254	-0.245826
		P221	14	0.248439	-0.466422	-0.136309	0.956089	0.911341	-0.730531	0.359334
		P354	16	0.246643	1.37452	0.900048	-1.23074	-1.30622	0.501648	-0.843205
		P356	14	0.242275	1.20604	0.686841	-0.868336	-0.85519	0.952762	-1.379
		P310	14	0.240585	0.14897	0.229748	0.240173	0.225731	-0.442151	-0.25147
		P155	15	0.235931	1.06449	0.663404	-0.946867	-0.864846	0.669204	-0.63183
		P434	14	0.232384	-0.968914	-0.411807	1.71782	1.50152	-0.190016	-1.14931
		P77	15	0.229223	-0.580303	-0.156611	0.829509	0.841807	0.138721	0.361421
		P61	16	0.228077	-0.170878	0.0437612	0.273529	0.234758	-0.670756	0.135668
		P279	15	0.216449	-0.276709	-0.00480743	0.262506	0.340089	-0.320153	-1.11106
		P224	16	0.216366	-0.152547	-0.0140138	-0.00276166	0.0295315	-0.969525	0.381833
		P344	16	0.214016	1.01899	0.720409	-0.757828	-0.960441	0.108525	-0.292855
		P380	15	0.212573	-0.357389	-0.00834999	0.760934	0.852159	-1.60777	1.58757
		P344	14	0.209948	1.0095	0.701564	-0.905371	-0.832761	0.0999307	1.14453
		P122	15	0.207145	-0.66865	-0.253312	1.38779	1.31549	-0.00131636	-0.365841
		P354	15	0.202434	0.784958	0.504898	-0.800325	-0.945879	0.226833	0.0498269
		P43	16	0.200104	0.863486	0.559798	-0.560768	-0.441722	1.31742	-1.25491
		P85	14	0.198565	0.62696	0.328204	-0.0745482	-0.173763	0.680505	-0.548324
		P17	15	0.196707	-0.797148	-0.22064	1.37475	1.22256	-0.390591	0.359871
		P325	16	0.196324	-0.746452	-0.295229	0.647968	0.735954	0.0313774	0.991397
		P121	14	0.19461	1.0046	0.72638	-0.9807	-0.999126	0.980824	-0.246644
		P257	14	0.194539	1.06157	0.634539	-0.709201	-0.690345	0.367641	0.694134
		P334	16	0.193969	0.945748	0.667458	-0.652551	-0.859458	0.230899	-0.266187
		P259	15	0.191451	-0.161529	-0.0622526	0.605439	0.595385	0.82235	-1.45755
		P334	14	0.190142	0.952845	0.663823	-0.865068	-0.771417	0.00424398	1.29514
		P183	14	0.186277	0.704275	0.531077	-0.285719	-0.266534	-0.193035	0.93793
		P291	15	0.184845	0.666611	0.499451	-0.74472	-0.568638	-0.376274	-0.159671
		P120	15	0.183055	0.434836	0.346185	-0.0851916	0.0627234	1.21879	-1.18023
		P314	14	0.180355	-0.94861	-0.478704	1.12577	0.990792	-0.877678	1.5005
		P196	16	0.179328	-0.513273	-0.196335	0.777496	0.72528	-0.738949	0.419958
		P54	15	0.174026	-1.0846	-0.529752	1.596	1.66687	-0.136714	-1.21948
		P159	16	0.171753	-0.501582	-0.223848	0.760155	0.985995	-0.649288	1.00283
		P229	16	0.168621	-1.00894	-0.514914	1.88877	1.95892	-1.1022	1.11248
		P81	14	0.167876	0.80087	0.473275	-0.610288	-0.669973	0.561058	-0.305238
		P5	14	0.163882	-0.873708	-0.425567	1.50124	1.31631	-0.504931	-0.58212
		P399	14	0.159779	1.86334	1.14905	-1.87164	-1.84994	1.59774	-1.29925
		P426	14	0.156601	1.04527	0.60386	-0.930771	-0.940758	0.573024	-0.0134073
		P198	16	0.148292	-0.375418	-0.120825	0.659384	0.695852	0.357014	1.07874
		P73	15	0.148185	0.282424	0.219329	-0.0204927	-0.00285962	0.649402	-1.10534
		P450	15	0.146544	0.0955793	0.16166	0.0454742	0.12392	-0.544437	0.46476
		P212	15	0.145729	0.343612	0.2039	0.117709	0.0496405	0.851954	-1.18892
		P280	14	0.142602	-2.10908	-0.956532	2.26639	2.43493	-3.38808	1.24354
		P355	15	0.139446	0.0643316	0.104726	0.262375	0.326289	-0.0403834	0.132911
		P243	14	0.137388	0.603548	0.391388	-0.616518	-0.460987	-0.00852224	0.577264
		P257	16	0.137268	0.63459	0.448158	-0.5183	-0.541045	-0.0451577	0.00763177
		P389	15	0.136179	0.453928	0.414799	-0.74136	-0.544156	-0.244331	-1.34679
		P216	16	0.134414	0.755355	0.443604	-0.718625	-0.884925	0.72571	-0.391803
		P179	14	0.133039	-0.0146893	0.0731248	-0.220133	-0.146782	-0.48073	0.101884
		P176	15	0.132752	0.222353	0.172148	-0.0728302	-0.17804	0.274588	-0.197321
		P51	15	0.129167	0.952364	0.516955	-0.893569	-0.911494	0.702502	-0.053184
		P45	14	0.128841	0.824947	0.54673	-0.33926	-0.438949	0.905335	-0.0296174
		P454	15	0.127622	0.88585	0.584894	-1.05722	-0.921871	0.238708	-0.98538
		P193	14	0.127128	1.89043	1.04487	-1.6594	-1.71188	1.54157	0.308479
		P51	14	0.126715	1.76979	0.976215	-1.32464	-1.33913	1.74137	-1.59481
		P448	14	0.124837	-0.729163	-0.310722	0.93141	0.766437	-1.16664	2.71335
		P145	14	0.124135	-0.905521	-0.407544	1.37554	1.2611	-1.62633	1.58362
		P139	15	0.120363	-0.456443	-0.1748	0.927264	0.887624	-1.79119	1.55629
		P355	14	0.113038	0.0677365	0.0907545	0.139761	0.182026	-0.648382	1.16092
		P309	16	0.108582	0.596758	0.450047	-0.811996	-0.896246	0.128449	-0.592211
		P326	16	0.107321	0.105133	0.0888377	-0.0928804	-0.15435	0.705744	-0.120194
		P329	14	0.105679	-0.0959727	0.125294	-0.207148	-0.113474	-0.106844	-0.626201
		P161	16	0.103711	0.350729	0.201455	-0.501774	-0.423057	0.84273	0.208208
		P153	14	0.102383	0.270046	0.199081	0.0605089	0.107355	-0.2017	0.410948
		P15	15	0.0970955	0.255634	0.095742	-0.24256	-0.36212	1.22102	0.359572
		P428	15	0.095619	0.379999	0.147906	-0.521385	-0.55618	0.537714	-1.15208
		P412	16	0.0894704	0.717921	0.420207	-1.2273	-1.05531	0.933634	-0.911328
		P61	15	0.0862749	-0.449641	-0.175391	0.782292	0.727459	-0.283287	0.566341
		P453	15	0.0831388	0.487683	0.23423	-0.950329	-0.715939	1.46118	-1.78527
		P100	14	0.0830083	0.680752	0.393399	-0.089086	-0.126499	1.23973	-1.20833
		P151	15	0.0825334	-0.0950749	-0.0202097	0.383483	0.120987	-0.798467	2.49296
		P228	16	0.0799966	0.545865	0.355539	-0.525541	-0.576352	1.36141	-0.0636102
		P46	15	0.0797788	-1.00481	-0.44123	1.22227	1.33186	-1.7978	1.20864
		P379	15	0.0772917	0.619961	0.349032	-0.591536	-0.736274	-0.519204	2.46919
		P63	16	0.0758074	-1.0614	-0.54806	0.973275	1.05421	-1.17812	0.554256
		P83	14	0.0730017	0.913719	0.610813	-0.862937	-0.844135	0.676942	-1.14039
		P45	16	0.0717824	0.499602	0.285576	-0.326921	-0.227582	1.22833	-0.793259
		P161	15	0.0697166	0.409499	0.223203	-0.437545	-0.516969	-0.162083	1.02127
		P9	15	0.0680616	0.754813	0.432668	-1.11741	-1.21347	0.702135	-0.642826
		P84	16	0.0673379	0.160129	0.126494	0.0128603	-0.0511775	-0.045749	0.247975
		P237	14	0.0671699	0.0374515	0.0779178	0.0379809	-0.0355048	0.103993	0.87026
		P410	14	0.0668204	0.712922	0.318454	-0.923145	-0.805533	0.0768889	-0.242385
		P250	14	0.0648252	-1.19388	-0.569046	1.05457	1.16619	-0.513777	-0.618462
		P141	15	0.0646886	-1.0043	-0.428919	1.26682	1.36181	0.64077	-0.321776
		P190	14	0.0640481	-0.79557	-0.384628	0.859201	0.907385	-1.39304	1.33141
		P76	15	0.0517638	0.27179	0.0896704	-0.703696	-0.495483	-0.0385888	0.369083
		P296	16	0.0477733	-0.301094	-0.127246	0.522954	0.382437	0.423548	0.164962
		P325	15	0.0468844	-1.41288	-0.591301	2.05601	2.08961	-2.39085	0.654211
		P345	14	0.0463431	0.182616	0.109427	-0.118692	-0.197554	0.529684	-1.3818
		P340	15	0.0393923	-0.13215	-0.0820069	0.591532	0.558759	0.673458	-0.273807
		P291	16	0.0372958	0.750682	0.449987	-0.799899	-0.833915	0.444218	-0.347431
		P291	14	0.0371519	0.825757	0.557622	-0.610596	-0.661607	0.551791	0.495197
		P196	15	0.031481	-0.12867	-0.0127221	0.302005	0.0712519	-0.641722	0.17542
		P110	15	0.0302215	0.212395	0.222367	-0.446923	-0.428276	0.734231	0.0206825
		P310	16	0.0262784	-0.313953	-0.145399	0.508873	0.36682	0.440071	0.152865
		P123	15	0.0244467	0.50763	0.231541	-0.628553	-0.534084	1.17787	-1.85828
		P311	16	0.0244238	0.648755	0.375975	-0.89979	-0.806102	2.02106	-0.5378
		P303	14	0.0224444	0.218495	0.0615971	-0.414967	-0.248838	-0.395953	0.11736
		P159	14	0.0204025	-0.343891	-0.236761	0.442674	0.470428	-0.929817	-0.428625
		P85	15	0.00816907	0.138004	0.0161367	0.147406	-0.088638	0.4552	1.10497
		P315	16	0.00560545	0.304599	0.180407	-0.283861	-0.339684	-0.253303	0.280616
		P259	16	0.00411916	-0.694895	-0.446815	0.508192	0.608046	-0.244032	0.358499
		P53	15	0.00345299	0.774866	0.513144	-1.7113	-1.14424	-0.18379	-1.14519
		P79	15	0.00166443	0.505272	0.22085	-0.51719	-0.644757	1.14842	0.638534
		P433	16	0.00108368	0.152967	0.077128	-0.330619	-0.452343	0.0441259	0.237211
		P215	15	-0.00112885	-0.208771	-0.156358	0.3611	0.373942	-1.10115	-0.0973714
		P151	14	-0.00782769	-0.216953	-0.137688	-0.0998277	-0.175094	-0.278617	-0.45158
		P270	16	-0.00917637	-0.482106	-0.289131	0.757666	0.831657	-0.297404	0.339979
		P391	14	-0.0196966	1.24917	0.66951	-1.31742	-1.34077	0.829585	-0.482115
		P194	16	-0.020382	-0.141493	-0.100758	0.345547	0.291247	-0.999465	1.03632
		P254	16	-0.0232002	0.994432	0.558785	-1.09756	-1.18263	0.507363	-1.06486
		P147	16	-0.0234649	0.666876	0.331603	-0.556579	-0.620611	-0.119663	-0.636586
		P449	14	-0.0243521	0.0652461	0.117159	-0.194775	-0.247682	0.422229	-1.4396
		P271	16	-0.0320469	0.660259	0.385444	-0.61472	-0.633631	-1.44534	0.329972
		P158	16	-0.0355319	-0.963551	-0.492849	0.914534	0.880151	-0.60935	1.39089
		P30	14	-0.0465116	0.0541103	-0.039126	-0.0919273	-0.14678	0.0987167	0.0866101
		P36	15	-0.0555262	0.698982	0.344823	-1.08347	-0.958469	0.279537	0.730029
		P37	14	-0.0564032	-0.236909	-0.161351	0.216522	0.143292	0.162587	-0.604092
		P458	14	-0.0578236	0.374314	0.0586834	-0.527673	-0.373296	-0.0865331	-0.287986
		P114	15	-0.0614578	0.365633	0.167648	-0.429769	-0.571177	0.89904	-0.903962
		P406	15	-0.0627758	0.412493	0.177411	-0.565567	-0.591105	0.066975	0.160477
		P9	16	-0.0634561	0.30793	0.154724	-0.445637	-0.509068	-0.208481	-0.327875
		P271	14	-0.0636928	0.320219	0.0232971	-0.257207	-0.270769	0.510331	-0.945377
		P182	16	-0.0642778	0.572376	0.335301	-0.565353	-0.847171	-0.955494	-0.407461
		P252	15	-0.0670419	0.00486001	-0.0676736	0.173102	0.234326	-0.543315	1.03605
		P22	16	-0.0716624	0.265737	0.1296	-0.591678	-0.628397	-0.394135	0.0394852
		P221	16	-0.0724304	-0.785009	-0.486943	0.616623	0.740748	-1.93071	1.00918
		P413	15	-0.0785031	-0.0412162	-0.0181584	-0.0688674	-0.183115	-2.02299	0.971786
		P185	15	-0.078923	-0.197707	-0.125992	-0.132817	-0.00991524	0.262994	-0.519587
		P406	14	-0.0794922	0.584529	0.37822	-0.942258	-1.05381	1.13598	-0.914019
		P306	14	-0.0815096	-1.02111	-0.555719	0.934794	0.890559	-1.07003	2.38974
		P65	16	-0.0815695	0.251071	0.0890673	-0.493098	-0.382873	-0.879496	0.112037
		P328	16	-0.0845764	-0.0629165	-0.0779881	0.0480906	-0.0562186	-0.0259943	-0.276223
		P99	15	-0.0848711	-0.505915	-0.297163	0.437058	0.586815	0.627115	-0.962491
		P308	16	-0.0882736	-1.46801	-0.914435	1.57594	1.69601	-1.47181	1.05005
		P373	16	-0.0940318	-1.25797	-0.799992	0.826198	0.955887	-0.683017	1.27123
		P447	14	-0.0941395	0.593779	0.379035	-0.576266	-0.624803	1.12414	-1.32602
		P199	14	-0.0962788	1.00069	0.477646	-0.899709	-0.929278	1.07375	-1.23068
		P10	15	-0.0987302	-0.954087	-0.525121	1.2452	1.18421	-1.02342	0.181366
		P315	15	-0.104702	0.218249	-0.0787763	-0.726359	-0.615426	1.13457	-0.963571
		P124	14	-0.105376	0.233469	0.063273	-0.174	-0.238765	0.977708	-1.27059
		P425	16	-0.108037	-1.0856	-0.617438	0.836625	0.858027	-1.10978	0.907758
		P354	14	-0.109988	0.87766	0.312947	-0.909929	-0.864942	0.915788	-1.15392
		P214	15	-0.110927	0.282601	0.102298	-0.410824	-0.483691	0.259229	0.282897
		P216	14	-0.112646	0.0400303	-0.102671	-0.308028	-0.297166	-0.232647	0.99302
		P23	16	-0.112706	1.54914	0.908073	-1.88014	-1.73477	0.527228	-1.42871
		P301	14	-0.114436	0.808884	0.367778	-0.677168	-0.771448	1.11686	-0.342215
		P206	14	-0.123317	-0.772733	-0.507173	0.47457	0.421674	-0.376807	0.810032
		P71	15	-0.123395	-0.2803	-0.253668	0.0779516	0.230878	1.76765	-2.37999
		P37	15	-0.12393	-0.310992	-0.265409	0.277741	0.236339	-1.11391	0.729661
		P441	14	-0.126506	-1.84804	-1.025	1.49714	1.3761	-0.815595	0.501721
		P235	15	-0.12801	-0.588949	-0.478309	0.386998	0.439804	-0.181865	-0.0463772
		P113	14	-0.129947	1.60293	0.680933	-1.59293	-1.72031	1.75398	-0.137499
		P247	15	-0.137193	0.74153	0.335811	-1.13273	-1.18885	1.1101	-0.0912342
		P32	15	-0.139758	0.582535	0.216648	-0.994795	-1.11772	0.479337	0.726274
		P228	15	-0.139872	0.594382	0.214742	-1.10896	-1.08348	0.826452	-1.35316
		P46	16	-0.14059	-1.11637	-0.734074	0.858532	0.832703	-0.14748	0.778472
		P123	16	-0.140902	0.0103427	-0.113436	-0.24136	-0.12024	-0.31486	-0.504435
		P360	15	-0.141305	0.111085	-0.0313078	-0.355558	-0.460687	0.618276	-1.16185
		P8	14	-0.142101	-0.533319	-0.301292	0.347564	0.321127	0.00498332	-1.3983
		P432	16	-0.148274	1.60086	0.816382	-1.48549	-1.58878	1.46992	-1.84996
		P216	15	-0.150987	0.114595	-0.0172383	-0.552033	-0.668694	0.116662	-0.189532
		P421	16	-0.151287	-0.697349	-0.503633	0.676304	0.787208	-1.17273	0.22997
		P74	15	-0.152123	0.249461	0.0284774	-0.68853	-0.498428	0.561129	-0.678416
		P410	15	-0.153227	0.125949	-0.034354	-0.46597	-0.561419	-0.440688	1.72491
		P8	16	-0.153329	-0.0673871	-0.0697185	0.0394482	-0.0645529	0.535888	-0.238791
		P203	15	-0.156699	0.00448352	-0.124291	-0.0714724	-0.386875	0.577259	-0.0969959
		P133	14	-0.156928	0.631272	0.230851	-0.958982	-0.877721	0.714014	-0.418138
		P83	16	-0.157614	0.759125	0.305987	-0.989207	-0.866596	-0.262526	-1.09459
		P264	14	-0.161204	-0.190793	-0.183798	-0.105526	-0.0999224	0.0972999	-0.460496
		P412	15	-0.170428	-0.00991513	-0.0806214	-0.651965	-0.722234	0.148937	-0.718065
		P65	15	-0.171632	-0.0460417	-0.116318	-0.163837	-0.138528	-1.22662	0.632375
		P251	14	-0.173588	-0.723661	-0.545284	0.340363	0.409091	-0.186031	0.207797
		P81	15	-0.174147	0.35249	0.0795511	-0.665486	-0.797055	1.57808	-1.1664
		P455	15	-0.175092	-0.257184	-0.157957	-0.0870682	0.0637454	-0.0521351	0.640502
		P229	14	-0.182003	-1.77689	-1.13644	1.8965	2.05448	-2.37173	0.519853
		P442	14	-0.183913	-0.436723	-0.356383	0.0327208	0.0710995	-0.107399	0.545828
		P190	16	-0.186314	-0.592491	-0.417168	0.415709	0.245122	0.0798896	1.07191
		P240	15	-0.188854	0.30681	0.0970008	-0.393661	-0.40606	0.205417	-0.61287
		P188	16	-0.194031	-0.514392	-0.410944	0.565039	0.593645	-2.3164	0.765035
		P252	16	-0.198935	0.745378	0.388088	-1.02223	-1.09766	-0.00252567	-0.390684
		P293	16	-0.199753	0.26566	0.00707615	-0.456495	-0.575777	0.0438566	-0.140046
		P100	16	-0.208837	0.240389	-0.0261886	-0.12655	-0.146685	-0.464974	-0.730897
		P293	15	-0.210021	-0.0170986	-0.117221	-0.647493	-0.674242	-0.664854	-0.39753
		P209	16	-0.210301	0.366165	0.0553494	-0.954751	-0.874593	1.56354	-1.3632
		P277	16	-0.210776	-0.788179	-0.523607	0.811792	0.761508	-0.482435	0.878567
		P277	15	-0.211211	-1.06415	-0.648893	1.23337	1.41485	-1.27692	-0.419575
		P248	16	-0.211957	-0.755567	-0.567365	0.241286	0.255847	0.186991	0.329541
		P127	14	-0.213334	-1.23985	-0.816729	1.13618	1.14696	-0.879577	0.495453
		P192	14	-0.217218	-1.34119	-0.839412	0.835903	0.857891	-0.909844	0.173404
		P71	16	-0.220485	-0.123376	-0.238325	0.248964	0.301125	1.42384	-0.195795
		P176	14	-0.22132	-0.8507	-0.521057	0.234312	0.293375	-0.687941	1.4271
		P386	16	-0.221965	0.0247776	-0.15419	-0.221479	-0.290443	0.613533	-0.415374
		P16	14	-0.222723	-0.615804	-0.428052	0.214568	0.238056	-0.496931	-0.0382131
		P197	14	-0.232695	-2.148	-1.1661	1.88476	1.98279	-1.63449	-0.278856
		P395	14	-0.237099	0.0896601	-0.134433	-0.170006	-0.187329	0.657961	-1.38112
		P249	16	-0.242369	0.661437	0.285418	-0.969937	-1.04422	1.44775	-0.672774
		P120	14	-0.244556	0.330817	0.0443002	-0.439123	-0.479289	0.324353	-0.233132
		P5	15	-0.245913	-1.02679	-0.547394	1.04433	1.04318	-1.62461	1.09104
		P192	16	-0.250033	-0.683613	-0.568188	-0.190191	0.0881024	-0.461277	0.400006
		P381	16	-0.251642	0.017663	-0.12689	-0.470573	-0.387909	-1.24394	-0.102757
		P390	14	-0.252635	-1.30825	-0.882041	0.84249	0.797298	-1.17003	1.00067
		P6	16	-0.256741	0.868831	0.291055	-1.14257	-1.12186	0.696539	-1.33089
		P145	15	-0.259683	-1.17256	-0.680655	1.24119	1.09611	-0.144847	0.122304
		P286	14	-0.26114	0.246805	-0.0624819	-0.676446	-0.487387	0.316434	-0.0688839
		P182	14	-0.2618	0.451965	0.0536344	-0.637425	-0.722221	0.596573	-1.32148
		P367	16	-0.271677	-0.254444	-0.337941	-0.0978468	-0.268977	0.315157	0.0875455
		P66	15	-0.278663	0.0353891	-0.0751432	-0.423617	-0.524883	0.621271	-0.0669669
		P163	14	-0.282817	-0.195995	-0.310746	-0.317372	-0.30868	0.337735	0.883374
		P194	14	-0.285731	-0.934935	-0.698946	0.6266	0.649503	-0.663989	0.155909
		P61	14	-0.286234	-0.891459	-0.686402	0.68117	0.590452	-0.701728	-0.372133
		P239	16	-0.290611	-0.178261	-0.250417	-0.0928594	-0.35259	0.399988	0.315495
		P5	16	-0.294797	-0.783349	-0.637365	0.67616	0.751425	0.0612963	0.129047
		P341	15	-0.295215	-0.723599	-0.578886	0.397799	0.32751	0.0111753	-0.741537
		P265	16	-0.298935	0.851012	0.281263	-1.42053	-1.37187	0.370941	-1.42833
		P84	14	-0.300538	0.222242	-0.0373973	-0.476336	-0.595372	0.545338	0.348429
		P193	16	-0.302214	0.963437	0.334879	-1.36691	-1.37997	-0.353862	-1.1523
		P120	16	-0.304414	0.28085	-0.0382064	-0.393508	-0.502491	0.0105222	-0.51853
		P16	16	-0.312276	-0.234608	-0.296618	-0.0847662	-0.149339	0.344412	0.129597
		P384	15	-0.313462	-0.536258	-0.434595	0.316822	0.503358	-0.692241	-1.73104
		P122	14	-0.316044	-1.02197	-0.782847	0.865197	0.824502	-0.463893	1.38208
		P94	14	-0.316599	-0.0663235	-0.203579	-0.248315	-0.108913	-0.00160254	0.657805
		P385	14	-0.321836	-0.630344	-0.501986	0.288676	0.193246	-0.505924	1.70251
		P385	16	-0.324675	-0.665707	-0.606898	0.462388	0.450219	-0.74202	1.02485
		P240	14	-0.328633	0.478514	0.13126	-0.605915	-0.651145	0.807545	0.110904
		P412	14	-0.332824	0.339919	-0.033135	-1.03529	-1.07536	0.565316	-0.454873
		P215	14	-0.334661	-0.54648	-0.45909	0.010248	-0.0388237	0.331892	-0.523693
		P265	14	-0.336933	0.381724	-0.0396085	-1.00143	-0.914026	0.907126	-1.24932
		P99	14	-0.341028	-0.787985	-0.670492	0.221841	0.0996861	0.210389	-0.923533
		P285	14	-0.347931	0.316794	-0.0377992	-0.932811	-0.8341	0.0112055	0.407047
		P285	16	-0.350131	0.156882	-0.0964402	-0.715366	-0.622125	-1.05398	0.38556
		P60	14	-0.354343	0.261701	-0.0408057	-0.777756	-0.833627	1.52534	-0.922558
		P194	15	-0.360202	-0.599646	-0.631669	0.31951	0.390498	1.87288	-0.489017
		P305	15	-0.362342	-0.526706	-0.581491	0.070952	0.0964518	0.234387	-0.880615
		P12	15	-0.366639	-0.999187	-0.609216	0.850757	0.756732	0.887285	-0.752462
		P136	16	-0.370881	1.08368	0.372272	-1.16195	-1.47782	1.21099	-1.23438
		P225	15	-0.372961	-0.100874	-0.207843	-0.66137	-0.608658	0.22102	-1.70938
		P87	15	-0.373281	-0.210472	-0.255469	-0.544944	-0.456561	1.23554	-1.19843
		P125	16	-0.376275	-0.651789	-0.634048	0.339557	0.257763	-0.231407	0.551671
		P64	14	-0.382874	-1.44784	-0.962333	0.946403	0.815951	-0.742425	0.387677
		P379	14	-0.383524	0.51267	0.0518682	-0.993044	-0.827773	1.36623	-1.92143
		P214	16	-0.383874	-0.0528856	-0.200889	-0.683857	-0.582242	-0.654956	-0.198912
		P14	15	-0.3853	0.639921	0.198113	-1.08431	-1.13422	0.938661	0.212578
		P147	14	-0.390828	-0.0811675	-0.303409	-0.116429	-0.117936	0.0742796	0.0849481
		P278	15	-0.394094	0.460043	-0.052366	-1.40752	-1.3974	0.449777	0.0710843
		P7	14	-0.3989	-0.284032	-0.308129	-0.180223	-0.140052	-0.759818	1.68273
		P421	15	-0.402447	-0.881892	-0.672897	0.576458	0.48619	1.01604	-1.26175
		P123	14	-0.403607	0.0869793	-0.209585	-0.342459	-0.385958	1.06729	-0.785976
		P384	14	-0.403693	-0.750207	-0.656091	0.0888291	0.162864	0.0107027	-0.880735
		P137	14	-0.404109	-0.620944	-0.681038	-0.122164	-0.0728105	0.265064	-1.06473
		P114	14	-0.406528	0.0978427	-0.223042	-0.521086	-0.472596	0.641984	-0.378887
		P97	15	-0.416431	-0.133145	-0.266481	-0.26627	-0.374949	0.17515	0.720409
		P191	15	-0.418969	0.549804	0.075344	-1.50311	-1.39298	0.807447	-0.052964
		P401	16	-0.424852	1.41981	0.577937	-1.97263	-1.98231	0.778709	-1.6488
		P224	15	-0.426143	-0.461168	-0.490742	-0.384873	-0.324353	1.15002	-1.19994
		P427	15	-0.42773	-0.184304	-0.251255	-0.484185	-0.405259	0.14578	0.12815
		P293	14	-0.429269	-0.339745	-0.539391	-0.238401	-0.251275	-0.162884	0.412631
		P244	15	-0.429848	-1.35967	-0.979233	0.934314	1.01036	-1.65291	0.229843
		P76	16	-0.431236	0.0953006	-0.148755	-1.00787	-0.794954	0.920172	-0.79292
		P306	15	-0.432194	-0.8088	-0.687963	0.503362	0.417144	0.606489	-1.49722
		P86	14	-0.435784	2.03771	0.829983	-2.18274	-2.22677	3.4788	-1.75698
		P210	15	-0.440615	0.0188268	-0.20916	-0.712619	-0.679289	0.101734	0.0766936
		P338	14	-0.442223	-0.287494	-0.454135	-0.326187	-0.275963	0.378406	-1.40861
		P205	16	-0.44329	-1.03825	-0.820683	0.747467	0.82599	0.147032	0.699153
		P356	16	-0.443415	-0.00784007	-0.257894	-0.19346	-0.330645	0.0389545	-0.288815
		P386	15	-0.443725	-0.140641	-0.319982	-0.315419	-0.397883	0.327799	-0.123346
		P251	15	-0.445631	-0.639331	-0.596127	-0.0776479	-0.0455461	0.491902	-0.15903
		P164	16	-0.445903	0.628375	0.125256	-0.86451	-0.963155	0.603812	-0.833841
		P75	14	-0.452334	-0.831958	-0.71818	0.416141	0.340458	-0.331859	-0.219292
		P283	14	-0.452336	-0.849632	-0.741453	0.312354	0.300737	-0.626939	-0.0678962
		P267	16	-0.46113	0.912421	0.287276	-1.48719	-1.46064	1.08412	-1.4365
		P304	14	-0.461777	-0.816095	-0.834429	0.00546038	-0.0335832	-0.823086	2.14241
		P76	14	-0.467236	-0.0751886	-0.222783	-0.925481	-0.762999	0.230372	-1.80707
		P338	15	-0.467506	0.131314	-0.179273	-1.09233	-1.03576	1.06246	-0.304843
		P266	16	-0.467734	0.0710908	-0.223814	-0.58954	-0.604516	0.531776	-0.0935978
		P296	15	-0.469236	-0.509869	-0.582408	0.0438608	-0.0118501	0.802283	-0.557381
		P117	16	-0.470908	-0.808379	-0.624046	0.0608222	0.1339	-0.697583	1.09792
		P279	16	-0.471752	-1.05754	-0.94129	0.800104	0.698057	-0.988776	1.02313
		P407	16	-0.475092	-1.40198	-0.993029	1.04322	0.993873	-0.177254	1.32707
		P230	16	-0.477431	0.53628	0.0519816	-1.20788	-1.16933	1.17013	-1.41175
		P99	16	-0.479712	-1.06852	-0.872414	0.827787	0.891355	1.12286	0.315579
		P143	14	-0.481241	0.818537	0.0294887	-1.16852	-1.17549	1.05273	-0.603158
		P329	16	-0.481922	-1.08874	-0.831144	0.55311	0.637981	0.293359	-0.0859262
		P226	15	-0.487232	0.871008	0.140467	-2.09497	-2.02234	2.17979	-2.63731
		P286	16	-0.489342	0.265135	-0.165608	-1.04605	-1.00926	-0.767007	-0.825854
		P399	16	-0.493157	1.15759	0.406836	-2.1364	-1.93528	1.00627	-0.681755
		P97	16	-0.493865	0.378921	-0.0636241	-1.03681	-0.923873	1.54738	-1.39131
		P310	15	-0.495886	-0.528999	-0.607117	0.024814	-0.0302412	0.805671	-0.54549
		P82	16	-0.496805	-0.0701858	-0.316758	-0.332693	-0.385338	0.80385	-0.185083
		P250	16	-0.497127	-0.618303	-0.643469	-0.136559	0.145576	-0.0308476	-0.357361
		P246	14	-0.497931	-0.220469	-0.482387	-0.041421	-0.158543	0.0122137	1.3364
		P81	16	-0.498025	0.137936	-0.219767	-0.841333	-0.774495	-0.743638	-0.365922
		P93	15	-0.499691	-0.735499	-0.592969	0.190618	0.149261	-0.0570997	-0.176711
		P98	14	-0.50017	-1.40117	-1.06019	1.08463	0.994022	-0.421055	-0.251102
		P158	15	-0.505406	-0.909316	-0.697616	0.24876	0.401119	-1.85708	0.509544
		P234	14	-0.50605	-0.683448	-0.75521	0.541966	0.437778	0.0443307	0.398081
		P136	15	-0.50793	0.53458	-0.0011759	-1.29328	-1.42561	0.763308	0.647742
		P64	15	-0.525771	-0.842329	-0.624752	0.524421	0.543866	-2.43469	1.50683
		P206	16	-0.527189	-1.2429	-1.01254	0.818481	0.782088	-0.376986	0.285809
		P312	15	-0.527306	-0.193929	-0.389336	-0.690728	-0.679057	-0.210657	0.162173
		P33	16	-0.536426	-0.470122	-0.580017	-0.136486	-0.00369617	0.99752	-0.72458
		P3	15	-0.537511	-0.684029	-0.618694	0.357616	0.253074	0.194569	0.0669686
		P279	14	-0.539457	-0.898992	-0.860569	-0.0204299	-0.0131504	-0.305716	1.33488
		P107	16	-0.542	-0.816994	-0.711771	0.548607	0.405079	0.820525	-0.267626
		P309	15	-0.544865	0.228929	-0.217265	-1.5316	-1.36442	-0.0739276	0.898443
		P168	16	-0.549957	-1.25852	-1.0232	0.473878	0.39097	0.0343595	0.963612
		P136	14	-0.550565	1.03793	0.200857	-1.34256	-1.41641	1.4253	0.319288
		P60	15	-0.556239	-0.0451555	-0.297849	-0.891832	-0.95282	0.158946	0.638341
		P138	15	-0.556267	-0.654327	-0.643929	-0.0444303	-0.0605645	0.958751	0.730185
		P165	15	-0.556528	0.263115	-0.202865	-1.51364	-1.35733	1.90079	-2.5146
		P295	16	-0.563594	-0.115697	-0.383955	-0.108608	-0.112092	2.14976	-1.11997
		P181	15	-0.565328	-0.800383	-0.793916	-0.0476775	0.00689202	0.206546	-2.10499
		P217	16	-0.570217	-1.31131	-1.08178	0.732672	0.748338	-1.55609	0.559445
		P166	15	-0.572563	-1.46701	-1.11194	0.858711	0.914525	-1.59767	0.208022
		P385	15	-0.579168	-0.465191	-0.575733	-0.13656	-0.120445	-0.180481	-0.0975777
		P87	14	-0.579369	0.0508469	-0.390272	-0.240612	-0.322224	0.776938	0.538717
		P256	16	-0.58346	-0.505983	-0.605718	-0.354341	-0.317417	0.696933	0.23345
		P260	15	-0.58509	-2.24158	-1.44664	2.06289	2.14944	-1.3453	-0.0377072
		P225	16	-0.585738	-0.676949	-0.741965	-0.29223	-0.216376	-0.0234889	0.111512
		P280	16	-0.587417	-2.00759	-1.4406	1.88449	1.94546	-1.85493	1.60102
		P256	14	-0.587901	0.193477	-0.21888	-1.0903	-1.03064	0.420738	-0.0783703
		P220	14	-0.59315	0.531014	-0.0908206	-0.943863	-0.947399	1.00346	0.718941
		P7	15	-0.596747	-0.447895	-0.485166	-0.431883	-0.318579	1.08476	-1.41765
		P132	16	-0.606466	-0.31738	-0.465376	-0.644179	-0.546615	1.66015	-0.367728
		P403	16	-0.608388	-2.92305	-1.95017	2.92184	3.27223	-2.35664	2.23032
		P208	16	-0.608732	-0.40147	-0.571665	-0.431538	-0.271131	0.842455	-1.35066
		P202	16	-0.611192	-0.904684	-0.884779	0.307242	0.37847	0.585885	0.429234
		P267	15	-0.613976	0.220651	-0.186639	-1.35463	-1.33888	0.0479249	0.457773
		P161	14	-0.618548	-0.615578	-0.693437	0.0304465	-0.0575005	-0.0182819	1.07736
		P453	14	-0.620357	-0.363497	-0.471491	-0.576579	-0.552069	0.41769	0.344492
		P454	16	-0.626944	0.667131	-0.00696445	-1.12296	-1.24139	0.0716624	-0.897105
		P199	15	-0.629407	-0.0890204	-0.383674	-0.849179	-0.852546	1.12762	0.123392
		P6	14	-0.629778	0.763325	-0.0180944	-1.31062	-1.28017	1.69309	0.72826
		P217	15	-0.635009	-1.33179	-1.01819	1.01353	0.940795	-0.213259	0.040773
		P305	14	-0.639324	-0.584562	-0.774854	-0.299169	-0.28658	0.0666363	1.54818
		P250	15	-0.641669	-0.83808	-0.827824	-0.0430925	0.0368425	-0.000728632	0.64843
		P66	14	-0.64286	-0.268923	-0.49803	-0.508082	-0.644287	0.30825	0.338353
		P138	16	-0.648189	-0.167565	-0.454396	-0.268785	-0.25896	1.23134	-0.881189
		P52	15	-0.65121	-0.617682	-0.770078	-0.377917	-0.320502	0.232791	-0.522867
		P148	14	-0.652934	0.516659	-0.154661	-0.987446	-1.04237	1.3234	-0.953072
		P134	14	-0.65296	0.450425	-0.133668	-1.03358	-1.01093	0.456592	0.242972
		P154	16	-0.654131	-0.231165	-0.533842	-0.328491	-0.45083	0.732392	-0.755998
		P400	15	-0.657932	0.0972052	-0.324628	-1.14396	-1.14509	1.57478	-0.759815
		P435	16	-0.65991	-1.36164	-1.09959	0.638073	0.527571	-1.12055	0.56816
		P187	16	-0.662372	0.490335	-0.100684	-1.26241	-1.05302	1.64883	-2.2667
		P393	16	-0.666389	-1.52442	-1.20524	1.22139	1.24215	0.162517	0.411037
		P213	14	-0.666569	-0.0352199	-0.465555	-0.773899	-0.682173	0.566044	-0.525648
		P210	14	-0.671	-0.0991817	-0.430839	-0.297049	-0.3858	0.796072	-1.31281
		P54	16	-0.676312	-1.4974	-1.23397	0.904682	1.07554	-0.031811	0.402606
		P247	16	-0.676563	0.252947	-0.221977	-0.916884	-1.02101	-0.6324	-0.579746
		P82	15	-0.684731	-0.412013	-0.599386	-0.25917	-0.478978	0.537989	-0.532129
		P345	15	-0.688311	-0.522281	-0.457569	-0.565714	-0.489359	0.3813	-1.10673
		P193	15	-0.689534	0.372274	-0.16276	-1.69213	-1.68904	1.11069	-0.633999
		P209	14	-0.694036	-0.615858	-0.739152	-0.245401	-0.210273	0.0334391	-0.131066
		P411	14	-0.6969	-0.266606	-0.580302	-0.538563	-0.513015	-0.536067	1.12962
		P124	16	-0.697824	-0.42836	-0.606468	0.115247	0.150676	0.652151	-0.318145
		P235	16	-0.699136	-1.09823	-1.01297	0.00567951	0.120052	-1.79092	0.765486
		P370	14	-0.704532	-0.0774568	-0.436715	-0.861376	-0.795061	0.115772	-0.54854
		P151	16	-0.715263	-0.954303	-0.933046	0.0303023	0.117167	-0.600091	-0.0904425
		P314	16	-0.715912	-1.45815	-1.20048	0.712574	0.650113	-0.104141	0.851123
		P208	15	-0.721817	-1.07885	-0.93175	-0.0121253	0.0308396	0.245234	-0.892841
		P54	14	-0.73411	-1.86246	-1.59801	0.959697	1.06541	-0.780509	-0.0236446
		P325	14	-0.737222	-1.76509	-1.42002	0.679973	0.758397	-1.08913	0.238543
		P280	15	-0.738221	-2.25159	-1.46504	1.63515	1.94392	-0.434161	-1.08641
		P8	15	-0.742062	-0.34918	-0.573572	-0.794505	-0.741887	0.341721	-0.741394
		P124	15	-0.744097	-0.62132	-0.706091	-0.368206	-0.169126	0.122882	-0.120006
		P424	15	-0.744946	0.159833	-0.304383	-1.39869	-1.35986	0.320444	0.853885
		P371	16	-0.74752	-0.478402	-0.631129	-0.551442	-0.54171	-0.700298	0.645731
		P374	14	-0.747617	0.289778	-0.319628	-0.991338	-0.956918	0.389868	0.0709074
		P341	16	-0.747657	-1.19211	-1.09297	0.289635	0.278756	-1.40106	0.665057
		P15	16	-0.748611	-0.89865	-0.888353	-0.0611685	-0.104792	-1.18634	0.926157
		P77	16	-0.753358	-1.14288	-1.06886	0.0531631	0.201526	0.400967	-0.664331
		P359	15	-0.757088	-0.185978	-0.444519	-1.01398	-0.859496	0.596437	-0.778284
		P51	16	-0.766389	0.753099	-0.0410084	-1.3839	-1.33797	0.00750474	-1.94459
		P97	14	-0.766982	0.284607	-0.335211	-1.05771	-1.06649	1.36547	-0.271146
		P220	15	-0.768491	0.207594	-0.364722	-0.977771	-1.07342	0.660541	-0.660167
		P424	16	-0.768958	0.726813	-0.0150839	-1.68346	-1.59426	0.701	-1.49648
		P294	16	-0.770355	-0.346055	-0.571898	-0.655145	-0.604453	1.67613	-1.41914
		P83	15	-0.773565	0.195118	-0.367127	-1.58751	-1.45147	0.864269	-0.770047
		P294	14	-0.774618	-0.690245	-0.872384	-0.258973	-0.328011	0.494093	0.294032
		P401	14	-0.77493	0.917836	0.039916	-1.68912	-1.65773	1.685	-0.584244
		P400	14	-0.776376	0.564043	-0.245734	-1.27742	-1.25118	1.1363	-0.617105
		P407	15	-0.776865	-1.65796	-1.28192	1.30528	1.16521	-0.668427	1.73429
		P210	16	-0.780184	-0.408789	-0.604279	-0.386559	-0.312488	1.78764	-0.818551
		P114	16	-0.784251	-0.208699	-0.550858	-0.441311	-0.571555	-0.996571	0.096503
		P349	14	-0.785461	-0.0513859	-0.499328	-0.910003	-0.818188	0.900521	-0.599237
		P368	14	-0.785874	-1.41802	-1.1899	0.396762	0.377416	-0.89755	1.19763
		P349	16	-0.786235	0.116227	-0.378177	-0.893093	-0.850242	-1.02998	-0.752873
		P90	14	-0.787543	-0.806448	-0.932011	-0.209698	-0.187786	-0.315867	-0.143525
		P6	15	-0.787799	-0.102546	-0.558948	-0.94084	-0.993993	1.76758	-1.60131
		P228	14	-0.788985	-0.189474	-0.575785	-0.706071	-0.724789	0.410549	-0.28612
		P370	15	-0.789398	-0.926669	-0.900761	0.0586085	0.297834	0.28727	0.165153
		P414	14	-0.789925	-0.0751065	-0.473457	-0.889202	-0.86767	1.14652	-2.15039
		P369	16	-0.790863	-0.531502	-0.747837	-0.617726	-0.497828	0.914231	-0.681497
		P134	16	-0.792316	0.231574	-0.27082	-0.944511	-1.03422	0.350715	-0.789141
		P331	15	-0.806067	0.00277396	-0.378069	-0.968745	-0.967991	0.95812	-0.0603639
		P52	16	-0.815388	-0.597377	-0.787448	-0.160894	-0.224113	0.0207962	-0.371011
		P251	16	-0.816657	-0.678205	-0.845893	-0.455476	-0.468176	-0.583379	-0.548859
		P202	14	-0.820124	-0.550976	-0.756296	-0.452186	-0.509114	0.992707	-0.318551
		P301	15	-0.820268	-0.135624	-0.512781	-1.45899	-1.28839	1.36807	-0.523493
		P455	14	-0.823366	-0.447835	-0.661716	-0.507651	-0.521891	0.941943	-0.745735
		P162	15	-0.824339	-1.07801	-1.07207	0.47081	0.40891	0.515932	-0.16417
		P382	14	-0.825808	-1.45082	-1.39375	0.518516	0.4538	-0.818635	0.501169
		P284	16	-0.826909	-0.285451	-0.570292	-0.736742	-0.745413	-0.363844	-0.534558
		P43	14	-0.827081	0.168322	-0.376788	-1.02098	-1.02726	0.958957	-0.414212
		P14	14	-0.830467	0.0894077	-0.376932	-0.723389	-0.85159	0.814036	-0.11355
		P232	15	-0.830998	-1.91518	-1.45558	1.92344	1.72134	0.40313	0.0208899
		P162	14	-0.832693	0.384837	-0.393607	-0.903923	-0.803555	1.1435	-1.22344
		P266	14	-0.835136	-0.211301	-0.585989	-0.734233	-0.823156	0.131491	1.51403
		P448	16	-0.835909	-1.76998	-1.44527	1.10125	0.978099	-0.728048	1.337
		P98	15	-0.839148	-1.42756	-1.24455	0.528078	0.373757	0.251812	-0.109662
		P33	15	-0.839759	-0.956263	-0.964957	-0.321837	-0.332176	1.19197	-1.86022
		P283	15	-0.841312	-1.69114	-1.20191	0.816944	0.854968	-1.47058	1.51803
		P33	14	-0.841594	-0.861674	-0.949441	-0.176984	-0.135115	0.189576	0.729516
		P132	15	-0.850623	-0.649058	-0.695879	-0.707111	-0.706563	1.33139	-0.468465
		P214	14	-0.853381	-0.596722	-0.812711	-0.484567	-0.41669	0.360322	0.401985
		P143	16	-0.85349	0.0649875	-0.408758	-0.828696	-0.925876	-0.290472	-0.407802
		P158	14	-0.85557	-2.1186	-1.56839	0.909602	0.899064	-0.741255	-0.379251
		P144	15	-0.857677	0.302129	-0.364278	-1.64558	-1.66451	0.9147	-0.577613
		P397	16	-0.858501	-0.435523	-0.66728	-0.686056	-0.671687	1.13405	-0.58291
		P111	14	-0.858524	-0.32048	-0.686631	-0.726814	-0.715789	0.269304	-1.23084
		P230	14	-0.86041	0.353249	-0.244903	-1.33893	-1.39706	1.42568	-0.0475648
		P244	14	-0.870978	-1.78637	-1.54213	0.60742	0.740107	-0.585643	0.0653397
		P215	16	-0.872675	-1.01496	-1.05301	-0.0415942	0.0727251	0.0415985	-0.32676
		P181	14	-0.875994	-1.49051	-1.35561	0.0266155	0.0561763	-0.93569	0.901397
		P86	16	-0.878062	1.08352	0.133115	-1.61738	-1.78146	1.80957	-1.81191
		P27	15	-0.879514	-0.380774	-0.730759	-1.43797	-1.16971	0.870408	-1.53952
		P260	14	-0.882694	-2.6477	-1.92524	1.80208	1.85177	-2.03499	2.23438
		P239	15	-0.883513	-0.638272	-0.907498	-0.440364	-0.49385	1.21801	-1.13882
		P278	14	-0.88539	0.0247592	-0.586358	-1.32759	-1.2924	0.765502	-1.51221
		P30	16	-0.886543	-0.536919	-0.768712	-0.570875	-0.387491	1.10915	-0.573762
		P414	16	-0.887549	0.0192767	-0.506944	-1.13067	-1.03401	1.08912	-1.53749
		P313	16	-0.888113	0.377546	-0.254277	-1.17165	-1.05464	2.2068	-2.05286
		P381	14	-0.890674	-1.23409	-1.24434	-0.0649225	0.0688295	-0.533915	-1.20052
		P166	14	-0.898289	-1.77815	-1.55741	0.564259	0.686896	-0.602343	0.129943
		P23	15	-0.898311	-0.14903	-0.429888	-1.09471	-1.06683	-0.0611999	1.90209
		P432	14	-0.899833	1.33709	0.209529	-2.11558	-2.13655	2.33468	-1.7791
		P390	16	-0.899927	-1.40619	-1.32713	0.487256	0.461902	-0.809202	0.596519
		P188	15	-0.912904	-1.04424	-1.06944	-0.0708411	0.0198929	0.168746	-0.765023
		P397	14	-0.918733	0.186204	-0.378112	-1.65663	-1.59425	0.92705	-0.896356
		P311	14	-0.920917	0.357535	-0.38336	-1.32844	-1.24187	0.798475	1.21607
		P128	15	-0.927196	-0.941741	-1.05183	0.0351613	-0.113077	0.0581389	-0.547324
		P295	14	-0.939726	-0.868995	-0.974089	-0.106835	-0.129321	0.931437	-1.578
		P154	14	-0.940035	-0.400637	-0.799994	-0.473524	-0.522982	1.13933	-0.34918
		P155	14	-0.943978	-0.381031	-0.712281	-0.634931	-0.698698	0.402214	-0.233545
		P226	14	-0.947757	-0.0440846	-0.491728	-0.978595	-0.943425	1.61357	-0.680629
		P283	16	-0.95245	-1.37225	-1.28492	0.467219	0.407643	0.0452557	0.406344
		P176	16	-0.956606	-0.628657	-0.893734	-0.809469	-0.736035	-1.78567	-0.116694
		P381	15	-0.958548	-0.690741	-0.88253	-0.60538	-0.632087	0.460743	0.155976
		P82	14	-0.960148	-0.568025	-0.862947	-0.606618	-0.642386	0.031044	0.642417
		P178	15	-0.960747	-2.10215	-1.64844	1.48715	1.53732	-1.51592	0.775507
		P458	16	-0.964606	-0.517684	-0.871767	-0.374711	-0.368707	0.565739	0.286015
		P230	15	-0.973667	-0.26023	-0.643403	-1.34173	-1.29067	2.15603	-1.42202
		P201	15	-0.987062	-0.897931	-0.913608	-0.245195	-0.377558	0.180573	0.980868
		P49	16	-0.99593	-0.793	-0.980237	-0.208014	-0.163786	0.863506	-0.4418
		P206	15	-0.998217	-1.22813	-1.19881	-0.223252	-0.121791	-0.610702	-0.066329
		P249	15	-1.01029	-0.413094	-0.768004	-0.944719	-0.825601	-0.503501	0.495525
		P90	16	-1.01057	-0.868539	-1.03598	-0.503553	-0.433778	-0.119722	-0.102557
		P458	15	-1.01488	-0.748342	-1.00573	-0.668858	-0.686012	0.00737478	0.281014
		P242	15	-1.01602	0.295991	-0.432462	-1.86936	-1.92419	1.30418	-0.223595
		P312	16	-1.02479	-0.297565	-0.742907	-1.04731	-0.845522	0.474276	-1.17032
		P254	14	-1.04108	-0.308729	-0.743703	-0.86877	-0.819859	0.778945	-0.584036
		P411	15	-1.04373	-0.740769	-0.933498	-0.277126	-0.397232	-0.168207	-0.11174
		P313	15	-1.04672	-0.222975	-0.662189	-1.13249	-1.06078	-0.138915	-0.0218753
		P164	14	-1.04848	0.0687095	-0.575921	-1.03294	-1.0113	0.835817	-0.184135
		P371	15	-1.04877	-1.02262	-1.10668	-0.372468	-0.310588	-0.37883	-0.0988464
		P65	14	-1.05085	-0.935949	-1.00612	-0.533972	-0.455284	-0.190541	0.375258
		P453	16	-1.06055	-0.765669	-1.00891	-0.47827	-0.392576	0.92765	-0.382388
		P165	16	-1.06105	0.537363	-0.304533	-1.84973	-1.6567	0.961083	-2.0694
		P368	16	-1.07433	-1.59744	-1.43752	0.863291	0.729422	-0.133198	1.24139
		P26	14	-1.07489	0.425391	-0.495394	-1.35976	-1.3858	0.967209	-1.19994
		P405	16	-1.08021	-1.44288	-1.40887	0.825452	0.73832	-0.919799	0.823812
		P201	14	-1.09372	-0.894	-1.13638	-0.0140532	-0.142242	0.494788	-0.572425
		P420	15	-1.09385	-0.912686	-1.14456	-0.895888	-0.917519	1.40611	-2.00176
		P144	16	-1.10551	0.764176	-0.210389	-2.25013	-1.95413	2.04908	-2.53352
		P112	14	-1.10575	0.393379	-0.471532	-1.41437	-1.42968	1.18179	-1.45659
		P424	14	-1.11987	0.193733	-0.55877	-1.77038	-1.59142	1.29858	-1.51639
		P370	16	-1.12144	-0.12503	-0.667025	-1.15653	-1.10014	0.474171	-0.248818
		P52	14	-1.12305	-0.811894	-1.16516	-0.551125	-0.546461	0.571835	-0.551304
		P170	14	-1.12313	-0.197371	-0.838728	-0.850288	-0.876018	0.726462	-0.200751
		P403	14	-1.12664	-3.04915	-2.32325	1.7671	1.68323	-0.937684	-0.32937
		P441	16	-1.12716	-2.41472	-1.9389	1.27945	1.2113	-1.61729	1.98489
		P267	14	-1.1358	0.177951	-0.625814	-1.54608	-1.48242	0.871502	-0.358593
		P414	15	-1.14409	-0.834489	-1.001	-0.922653	-0.872593	0.497887	0.0729693
		P411	16	-1.14767	-0.717234	-0.975056	-0.498983	-0.485932	-0.330594	0.143381
		P107	14	-1.16204	-1.38651	-1.47758	0.350177	0.199132	0.0580641	0.787976
		P396	14	-1.16841	0.648541	-0.351146	-1.89058	-1.77049	1.39734	-0.966085
		P68	16	-1.17062	-1.37777	-1.47188	0.0314756	0.127695	-0.333819	0.0853506
		P405	14	-1.17864	-1.31436	-1.45144	-0.0918897	-0.145357	0.999684	-2.04398
		P147	15	-1.18002	-1.02138	-1.20902	-0.415534	-0.445214	0.171784	-1.31613
		P425	15	-1.18065	-1.91194	-1.57126	0.634895	0.600128	-0.50083	0.877704
		P271	15	-1.18351	-0.797411	-1.05943	-0.955884	-0.971279	-0.202089	1.32067
		P254	15	-1.18992	-0.535788	-0.893956	-1.0404	-1.07278	0.486761	-0.619956
		P137	15	-1.20165	-1.43911	-1.41005	-0.237202	-0.29326	0.756083	-0.502334
		P181	16	-1.20264	-1.56871	-1.55273	0.0208206	0.132429	0.789268	0.320513
		P47	16	-1.20388	0.527681	-0.337149	-1.88299	-2.00985	0.720694	-1.48038
		P213	15	-1.20554	-0.945539	-1.27057	-0.761856	-0.761915	0.325601	-0.444821
		P331	16	-1.21571	0.313361	-0.458767	-1.38678	-1.38628	1.58216	-1.81136
		P86	15	-1.21702	0.733214	-0.366137	-3.04079	-2.99523	1.73609	-0.733139
		P128	16	-1.22189	-1.38334	-1.49107	0.740062	0.685608	-0.38211	0.0437931
		P203	14	-1.22574	-0.489714	-1.10867	-0.654623	-0.826463	1.1092	-0.14485
		P165	14	-1.23479	0.210849	-0.70035	-1.55036	-1.48233	1.67569	-1.31579
		P234	16	-1.23914	-1.02745	-1.28338	0.317219	0.220702	1.42417	-0.109684
		P171	14	-1.23995	-1.20439	-1.45969	-0.148061	-0.268828	0.724817	0.175518
		P235	14	-1.24016	-1.88114	-1.69644	0.0707359	0.114488	0.139303	-1.43583
		P3	14	-1.2405	-1.28002	-1.32358	-0.185422	-0.158062	0.0488104	0.259399
		P13	15	-1.24071	-0.899928	-1.20075	-0.473153	-0.509211	0.774707	-0.553819
		P71	14	-1.24219	-1.22742	-1.3659	-0.012922	0.0160316	0.292733	-1.0218
		P111	15	-1.25438	-0.771078	-1.13841	-0.924297	-0.811836	0.103528	-0.376506
		P426	16	-1.25994	-0.554895	-1.03192	-1.01714	-0.9891	1.37399	-1.47317
		P107	15	-1.26059	-1.03917	-1.20238	-0.579122	-0.696441	0.81418	-0.5383
		P285	15	-1.26085	-0.827511	-1.15534	-0.989233	-0.927232	0.972429	0.0901581
		P284	15	-1.26268	-0.871593	-1.07811	-0.941754	-1.02187	0.60907	1.3044
		P138	14	-1.26668	-0.930544	-1.25095	-0.261341	-0.374184	0.811324	-1.31684
		P87	16	-1.27291	-0.163715	-0.842468	-1.02899	-0.9501	0.315593	-0.670256
		P303	16	-1.27856	-0.809622	-1.1103	-0.762103	-0.86995	0.70339	-0.812454
		P32	16	-1.27868	-0.101137	-0.753688	-0.969586	-0.993965	0.521435	-1.10342
		P170	15	-1.28048	-0.705239	-1.10789	-0.932117	-1.01102	1.56441	-0.905821
		P430	14	-1.2833	-1.79565	-1.70832	-0.00620291	0.0178153	-0.156675	-0.60311
		P396	16	-1.29713	0.675904	-0.299759	-1.87865	-1.85489	1.94852	-2.17333
		P262	15	-1.30367	-0.871087	-1.23829	-1.16246	-1.25242	0.757277	-0.644256
		P315	14	-1.3058	-1.17084	-1.35407	-0.415731	-0.42851	-0.811124	1.71999
		P400	16	-1.31097	0.113692	-0.684963	-1.36823	-1.33567	0.424535	-1.90074
		P23	14	-1.31673	0.222615	-0.713993	-1.66596	-1.68991	1.63399	-2.77769
		P307	14	-1.31927	-0.706509	-1.211	-0.565134	-0.667743	0.671538	1.1177
		P171	16	-1.32509	-1.23882	-1.43659	-0.203972	-0.240192	-0.450989	0.131179
		P244	16	-1.32985	-1.40068	-1.54974	0.139315	0.252949	0.00596371	0.0293426
		P171	15	-1.33991	-1.28972	-1.38377	-0.501073	-0.595612	0.734417	-2.25816
		P278	16	-1.34005	-0.483357	-0.99072	-1.02437	-1.0671	0.657532	-0.531852
		P410	16	-1.35219	-0.304534	-0.884636	-1.50068	-1.39649	0.132905	-1.08569
		P36	16	-1.35597	0.337145	-0.535758	-1.70038	-1.69738	0.218613	-1.26198
		P420	14	-1.3639	-0.860479	-1.36923	-0.851156	-0.766879	0.20136	-0.617972
		P242	16	-1.36967	1.26515	-0.0969878	-2.61615	-2.45954	1.39125	-2.99301
		P32	14	-1.37068	-0.094229	-0.936098	-1.19255	-1.21577	1.35008	-1.52063
		P112	15	-1.37909	-0.59943	-0.969927	-1.35316	-1.55201	1.23845	0.922826
		P163	16	-1.37952	-1.31818	-1.51979	-0.377555	-0.297643	-0.350255	0.182389
		P203	16	-1.38304	-0.574245	-1.12296	-0.83475	-0.879767	0.524863	-0.421122
		P143	15	-1.38825	-0.489994	-1.0464	-1.30349	-1.50126	0.261447	0.261449
		P104	16	-1.39607	-1.69792	-1.68751	0.462069	0.405052	-0.242636	0.418492
		P408	14	-1.4056	-0.860749	-1.34748	-0.826543	-0.827131	0.0709436	0.981321
		P430	16	-1.40834	-0.866942	-1.24245	-0.590473	-0.688481	0.507864	-0.222247
		P305	16	-1.41471	-1.00536	-1.35966	-0.433999	-0.341871	1.73783	-1.0834
		P109	16	-1.41765	-1.72104	-1.7105	0.474191	0.413833	-0.193214	0.414805
		P249	14	-1.42709	-1.09601	-1.27952	-0.392703	-0.522007	0.00792793	1.39062
		P386	14	-1.43199	-0.827426	-1.28146	-0.88827	-0.918875	0.759397	-0.061407
		P85	16	-1.43433	-0.755407	-1.20285	-0.606688	-0.62345	-0.0639322	-0.650261
		P163	15	-1.43438	-1.76989	-1.78552	-0.493282	-0.407722	1.02048	-1.25406
		P166	16	-1.44331	-1.46025	-1.6391	0.0430088	0.153474	0.0777716	-0.0868853
		P313	14	-1.44789	0.0643807	-0.885194	-1.67714	-1.57646	1.4691	-2.03858
		P111	16	-1.44858	-0.190853	-0.881587	-1.4899	-1.42563	0.296455	-1.41194
		P117	14	-1.46143	-1.5677	-1.47605	-0.142369	-0.343792	0.0774253	0.840973
		P247	14	-1.46565	-0.385414	-1.06442	-1.13986	-1.20567	0.895635	0.458802
		P66	16	-1.46717	-0.95459	-1.33429	-0.377786	-0.533407	0.919566	-0.217573
		P162	16	-1.47012	-0.380545	-1.09558	-0.875071	-0.815992	1.88871	-1.93706
		P359	14	-1.47038	-0.465836	-1.05942	-1.22144	-1.23222	0.848368	-0.45643
		P122	16	-1.47312	-1.7661	-1.87114	0.714444	0.595866	0.569966	0.466588
		P252	14	-1.47468	-1.24297	-1.53653	-0.614071	-0.460239	0.0588097	-0.621188
		P132	14	-1.47842	-0.659888	-1.24207	-1.02657	-1.11971	0.5544	0.978267
		P368	15	-1.49052	-2.42212	-1.90311	1.1912	1.30831	-2.07981	1.3822
		P242	14	-1.49932	0.419642	-0.689896	-2.08792	-1.90632	2.31498	-3.09649
		P134	15	-1.50515	-0.925698	-1.24583	-1.09817	-1.17048	-0.331164	-0.318478
		P128	14	-1.51818	-1.4301	-1.71998	0.0484276	0.104415	0.758109	-1.11834
		P108	14	-1.53165	-1.93366	-1.94147	0.302612	0.208685	-0.761623	1.01186
		P90	15	-1.54465	-1.62874	-1.69996	-0.575171	-0.500555	0.706006	0.0962579
		P145	16	-1.54885	-2.08905	-2.06488	0.916351	0.765069	-1.05615	1.16701
		P137	16	-1.55729	-1.19108	-1.51278	-0.623026	-0.649109	1.05255	-0.629435
		P349	15	-1.56667	-1.02961	-1.36823	-1.37909	-1.32166	0.946686	-0.81775
		P108	16	-1.56702	-1.66019	-1.78413	0.0233004	-0.0422485	-1.16232	1.09453
		P144	14	-1.60041	-0.20063	-1.01711	-1.76304	-1.7113	1.05477	-0.387388
		P142	14	-1.60726	-2.10804	-2.17212	0.428029	0.388007	0.221543	-1.53926
		P213	16	-1.61356	-0.660417	-1.23578	-1.06369	-1.04022	0.193425	-0.954884
		P408	16	-1.62155	-1.08124	-1.48225	-0.505291	-0.736766	0.822802	-0.504673
		P329	15	-1.68986	-1.63253	-1.71203	-0.889486	-0.794473	-0.383948	-0.426158
		P307	16	-1.69989	-0.867624	-1.46144	-0.615767	-0.851496	0.474561	-0.337269
		P205	14	-1.71072	-2.5	-2.3118	0.414994	0.382546	-0.443561	-0.338977
		P304	15	-1.75382	-2.07362	-1.99692	-0.176558	-0.125407	-0.396891	-0.330072
		P232	16	-1.79644	-2.19886	-2.25108	0.865187	0.727004	-1.30716	0.457758
		P187	15	-1.80276	-1.4318	-1.66826	-0.975314	-1.06059	1.14134	-0.307668
		P382	16	-1.81122	-2.10114	-2.16222	0.593659	0.596706	-0.161898	0.383105
		P187	14	-1.84314	-0.886197	-1.47856	-1.16566	-1.09692	1.0991	-0.786444
		P27	14	-1.84966	-1.49057	-1.96897	-1.16104	-1.05078	0.559266	-0.942813
		P188	14	-1.87154	-2.72242	-2.39972	0.622169	0.772139	-0.880073	0.255561
		P36	14	-1.87414	-0.213371	-1.25639	-1.92134	-1.87632	1.15357	-0.373262
		P3	16	-1.87604	-1.33236	-1.75635	-0.5416	-0.440685	-0.164942	0.200607
		P116	14	-1.87988	-0.0403551	-1.22433	-1.95193	-1.96869	2.44635	-1.5001
		P190	15	-1.88535	-2.41413	-2.23972	0.34505	0.105368	0.206525	0.343282
		P142	15	-1.91351	-2.55677	-2.35907	0.341209	0.398911	0.777611	-0.671977
		P47	15	-1.91472	-0.929662	-1.55618	-1.77943	-1.75877	1.76547	0.0814991
		P408	15	-1.95537	-1.74458	-1.94123	-0.888981	-1.16173	0.766876	0.402395
		P13	14	-1.95719	-1.14859	-1.79084	-0.889298	-0.923829	1.13602	-0.337074
		P303	15	-1.97229	-1.87729	-1.99279	-0.886285	-0.835071	0.237024	-0.508779
		P369	15	-2.06114	-2.36232	-2.24891	-0.0780123	-0.138347	0.972554	-0.272777
		P371	14	-2.07254	-1.68943	-2.10132	-1.0844	-0.9798	0.397085	0.0514169
		P262	14	-2.07255	-1.45057	-2.1842	-1.1642	-1.15217	1.05788	-0.569402
		P117	15	-2.09518	-2.10751	-1.97825	-0.660936	-0.529835	0.0480797	-1.39673
		P304	16	-2.0988	-2.30168	-2.39763	-0.00444269	-0.059643	0.118421	0.429284
		P420	16	-2.1216	-1.18513	-1.83213	-1.25199	-1.17661	2.65785	-2.13428
		P454	14	-2.14319	-0.760278	-1.67293	-1.60206	-1.64875	1.85069	-0.774487
		P142	16	-2.15064	-2.42339	-2.62354	0.681198	0.733992	-2.16913	1.19321
		P331	14	-2.16496	-0.517689	-1.51722	-1.99879	-1.81428	1.30481	-1.14533
		P164	15	-2.16774	-1.2151	-1.85364	-1.49101	-1.67423	0.638325	0.062697
		P262	16	-2.17465	-1.232	-1.88654	-1.23353	-1.20075	1.31769	-0.934384
		P426	15	-2.18403	-1.7043	-1.94633	-1.35283	-1.33303	1.94835	-0.74987
		P47	14	-2.24429	-0.692862	-1.69532	-1.8774	-1.8375	1.41157	-0.598299
		P116	15	-2.28408	-1.03568	-1.78888	-2.19105	-2.29529	1.32857	-1.59861
		P287	14	-2.31636	-2.2516	-2.10678	-1.01576	-0.933374	0.479601	-0.690493
		P116	16	-2.35576	-0.340216	-1.44073	-2.17506	-2.16187	1.9141	-2.44178
		P382	15	-2.37018	-3.06119	-2.8726	0.344327	0.332672	-0.338975	0.686603
		P405	15	-2.41969	-2.32545	-2.51814	-0.838848	-0.87911	0.987557	-0.770948
		P108	15	-2.4283	-2.19527	-2.53982	-0.697829	-0.959467	0.773596	0.695385
		P312	14	-2.50965	-2.13443	-2.63923	-1.09298	-1.00866	0.606319	-1.02648
		P26	15	-2.57176	-1.5836	-2.06649	-1.74128	-1.74493	1.24306	-0.917464
		P307	15	-2.74121	-2.20187	-2.68577	-1.58355	-1.61219	1.0457	-1.67724
